# Supplementary material
Source: HighWire-hosted journal article supplement (https://www.life-science-alliance.org/content/1/2/e201800061/F3)

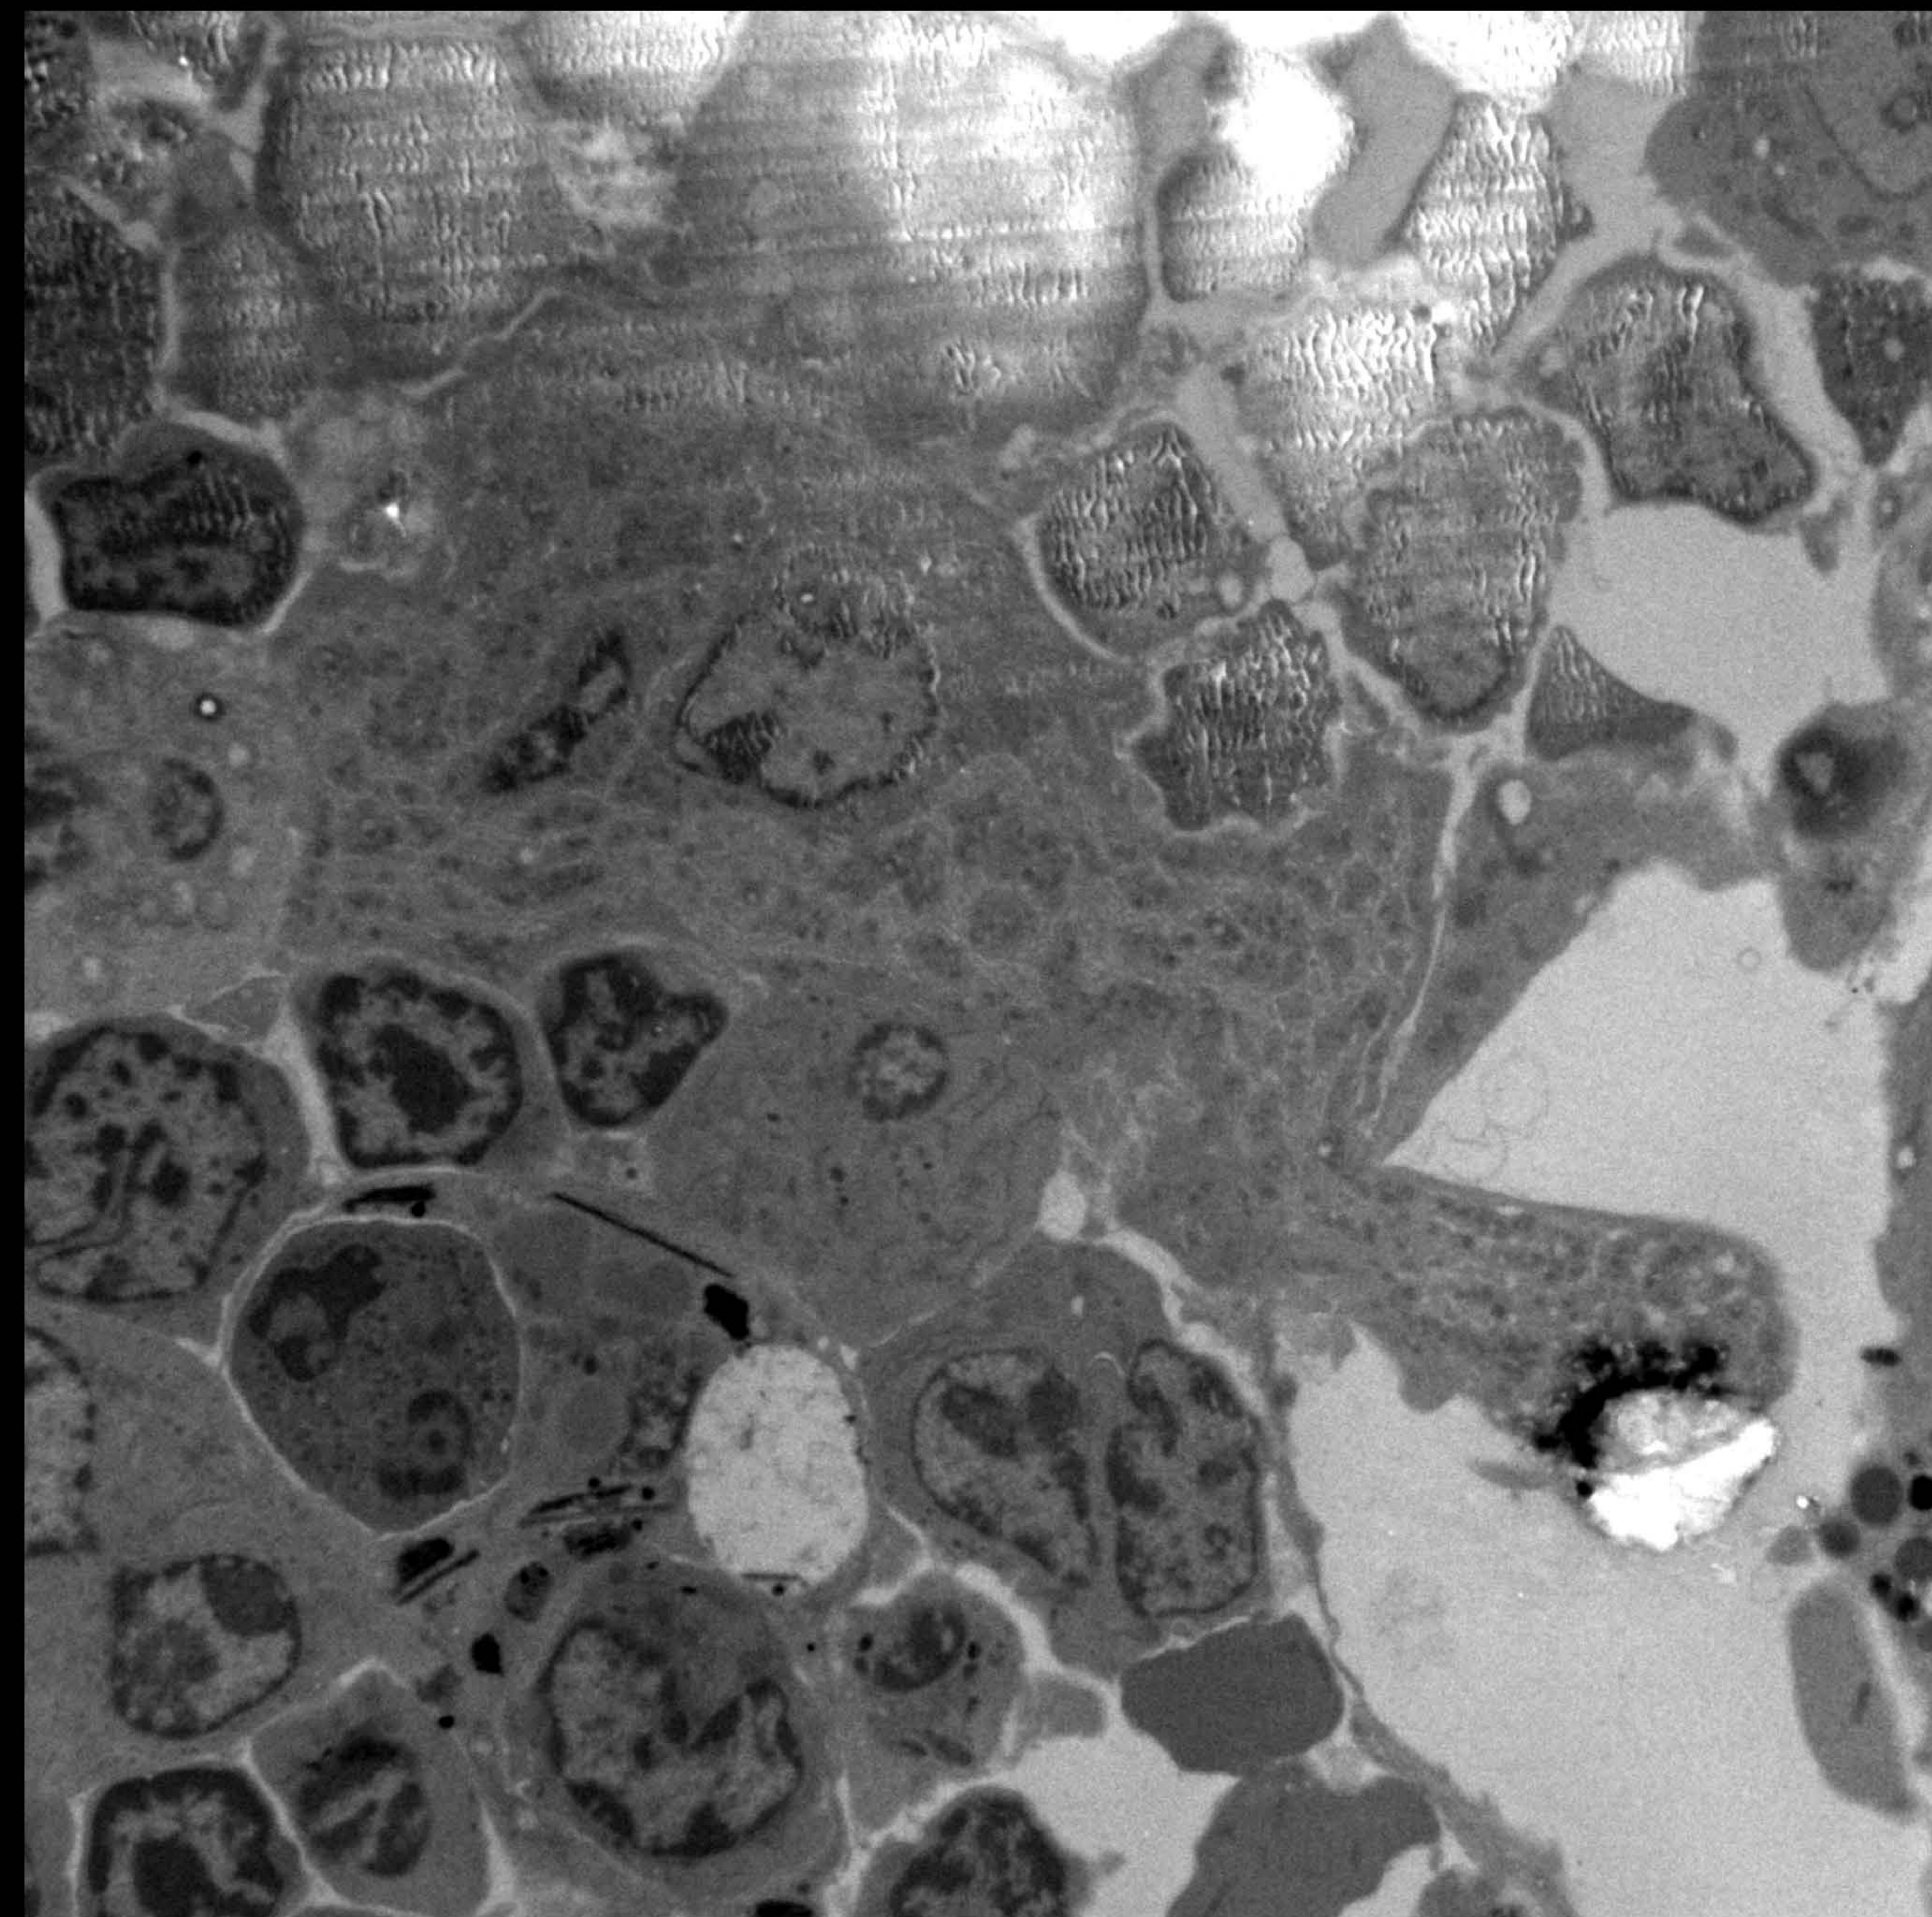



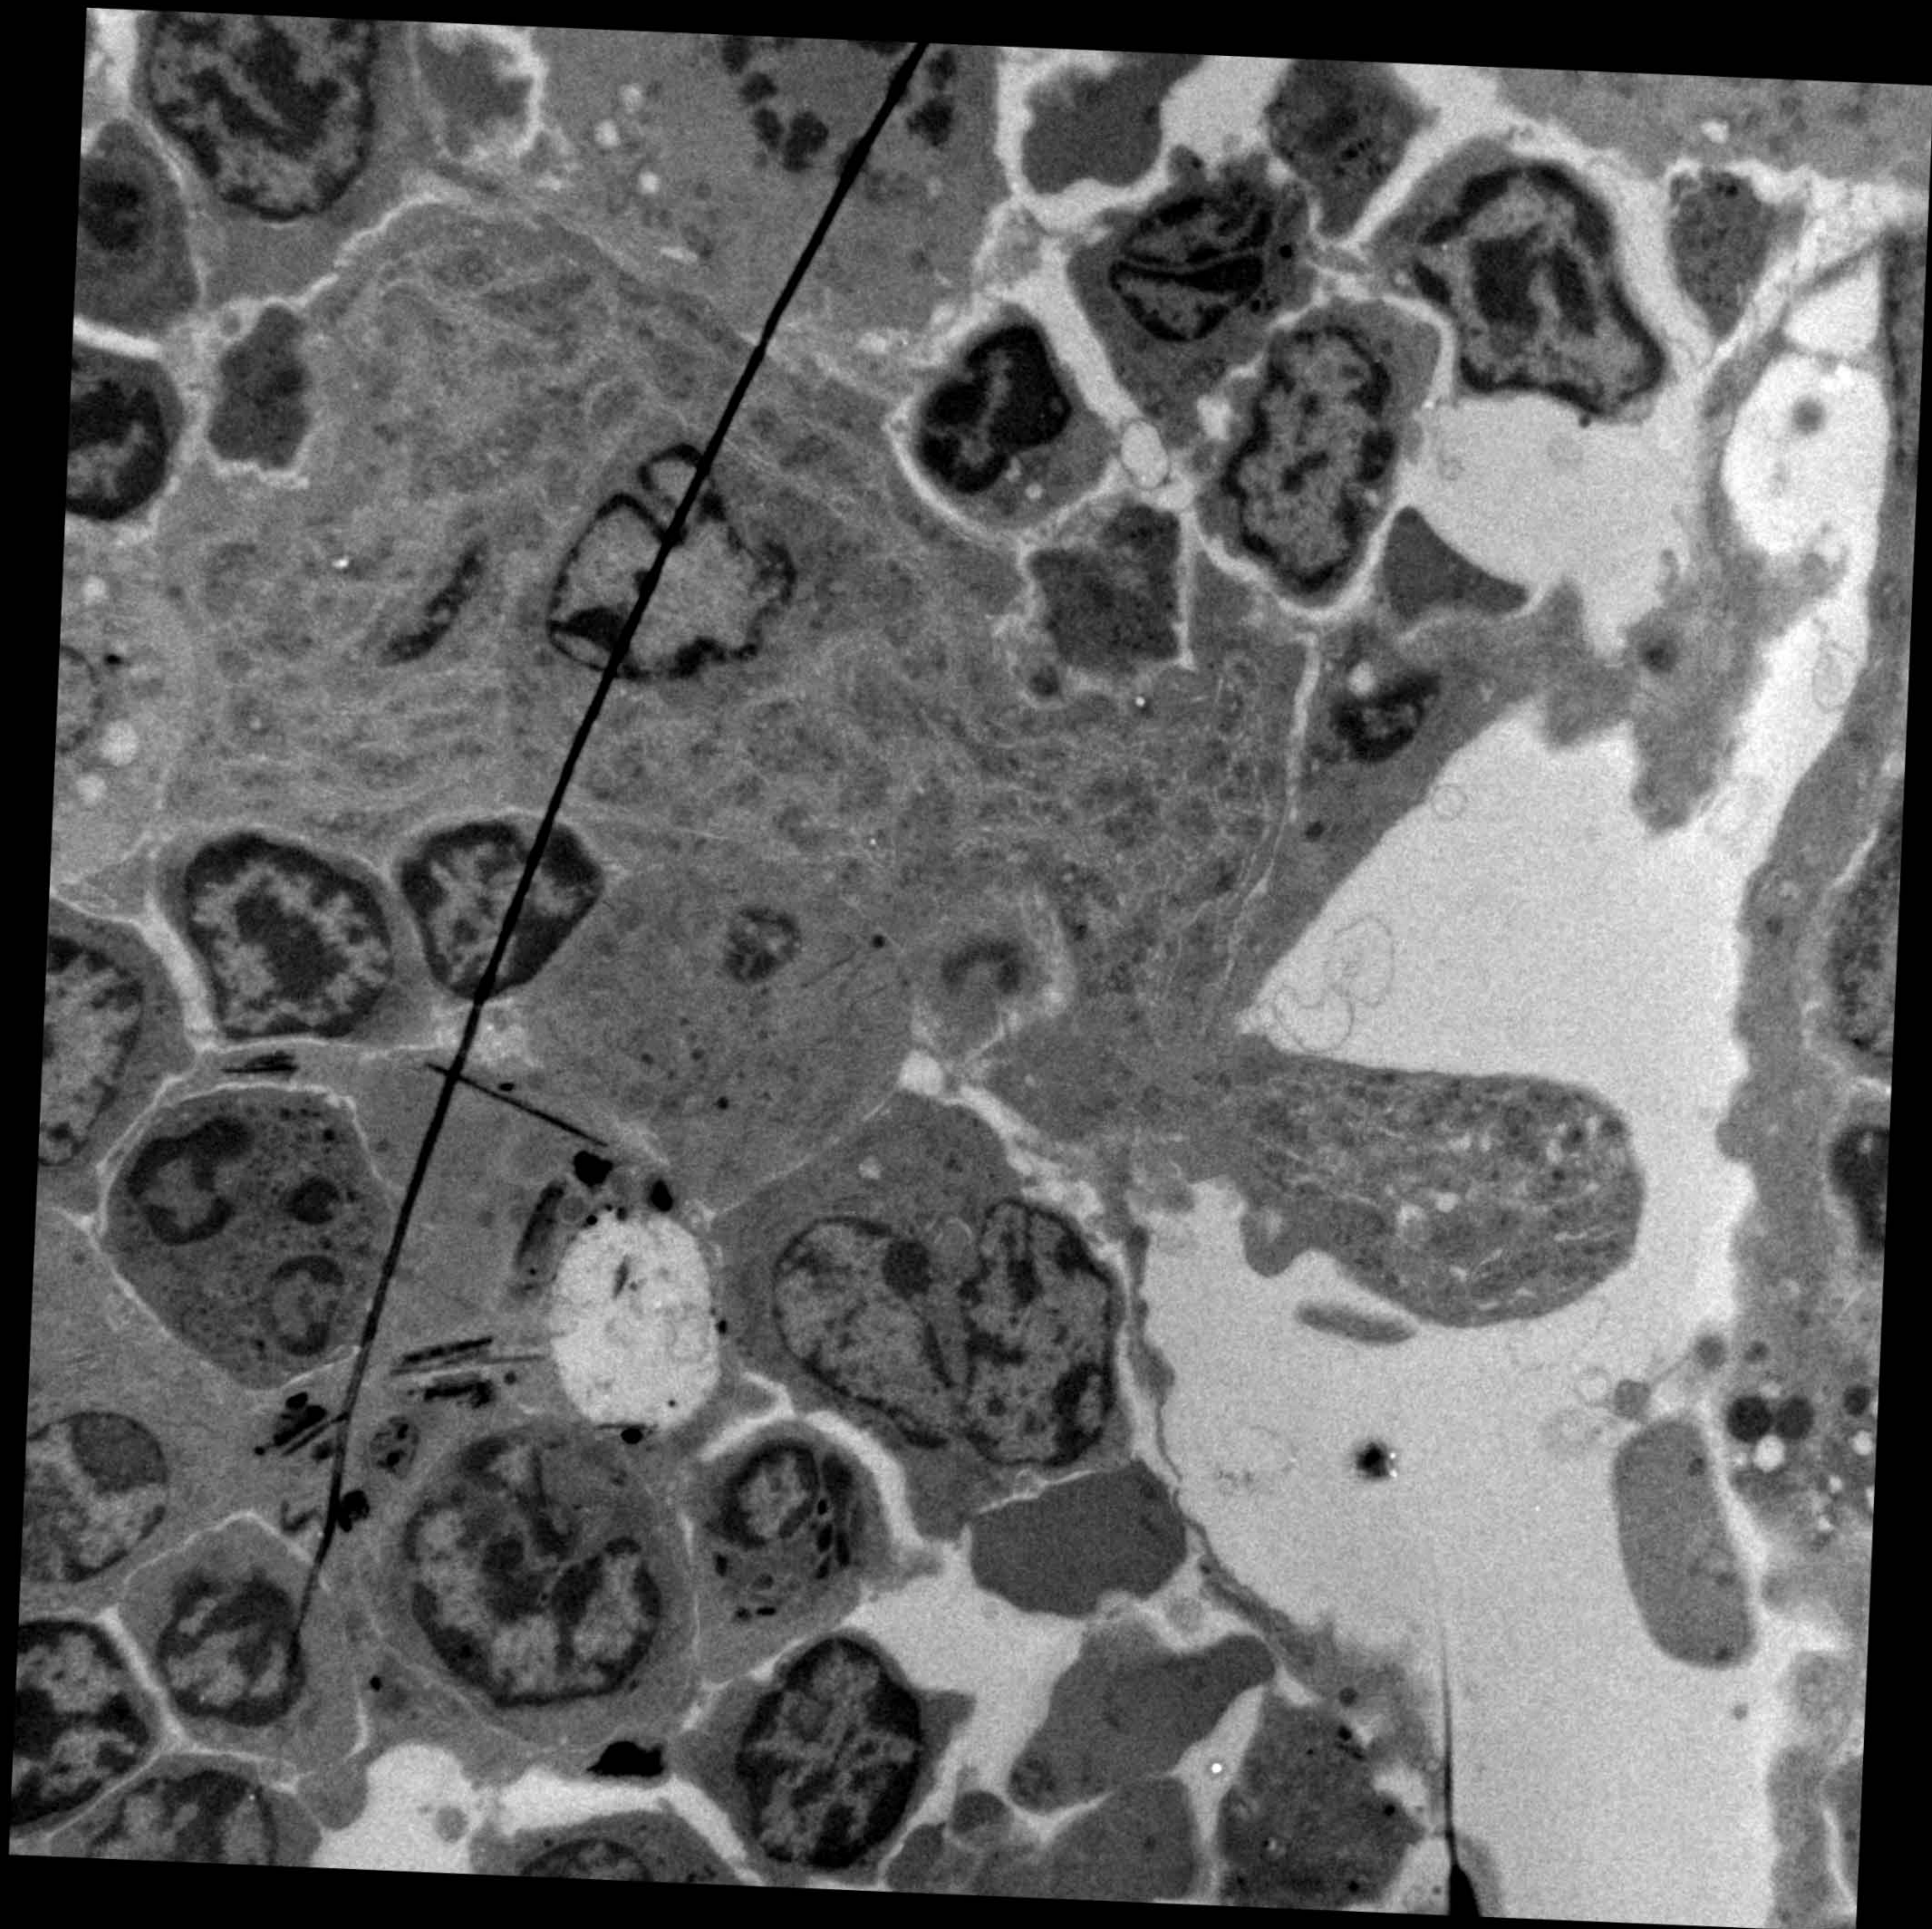



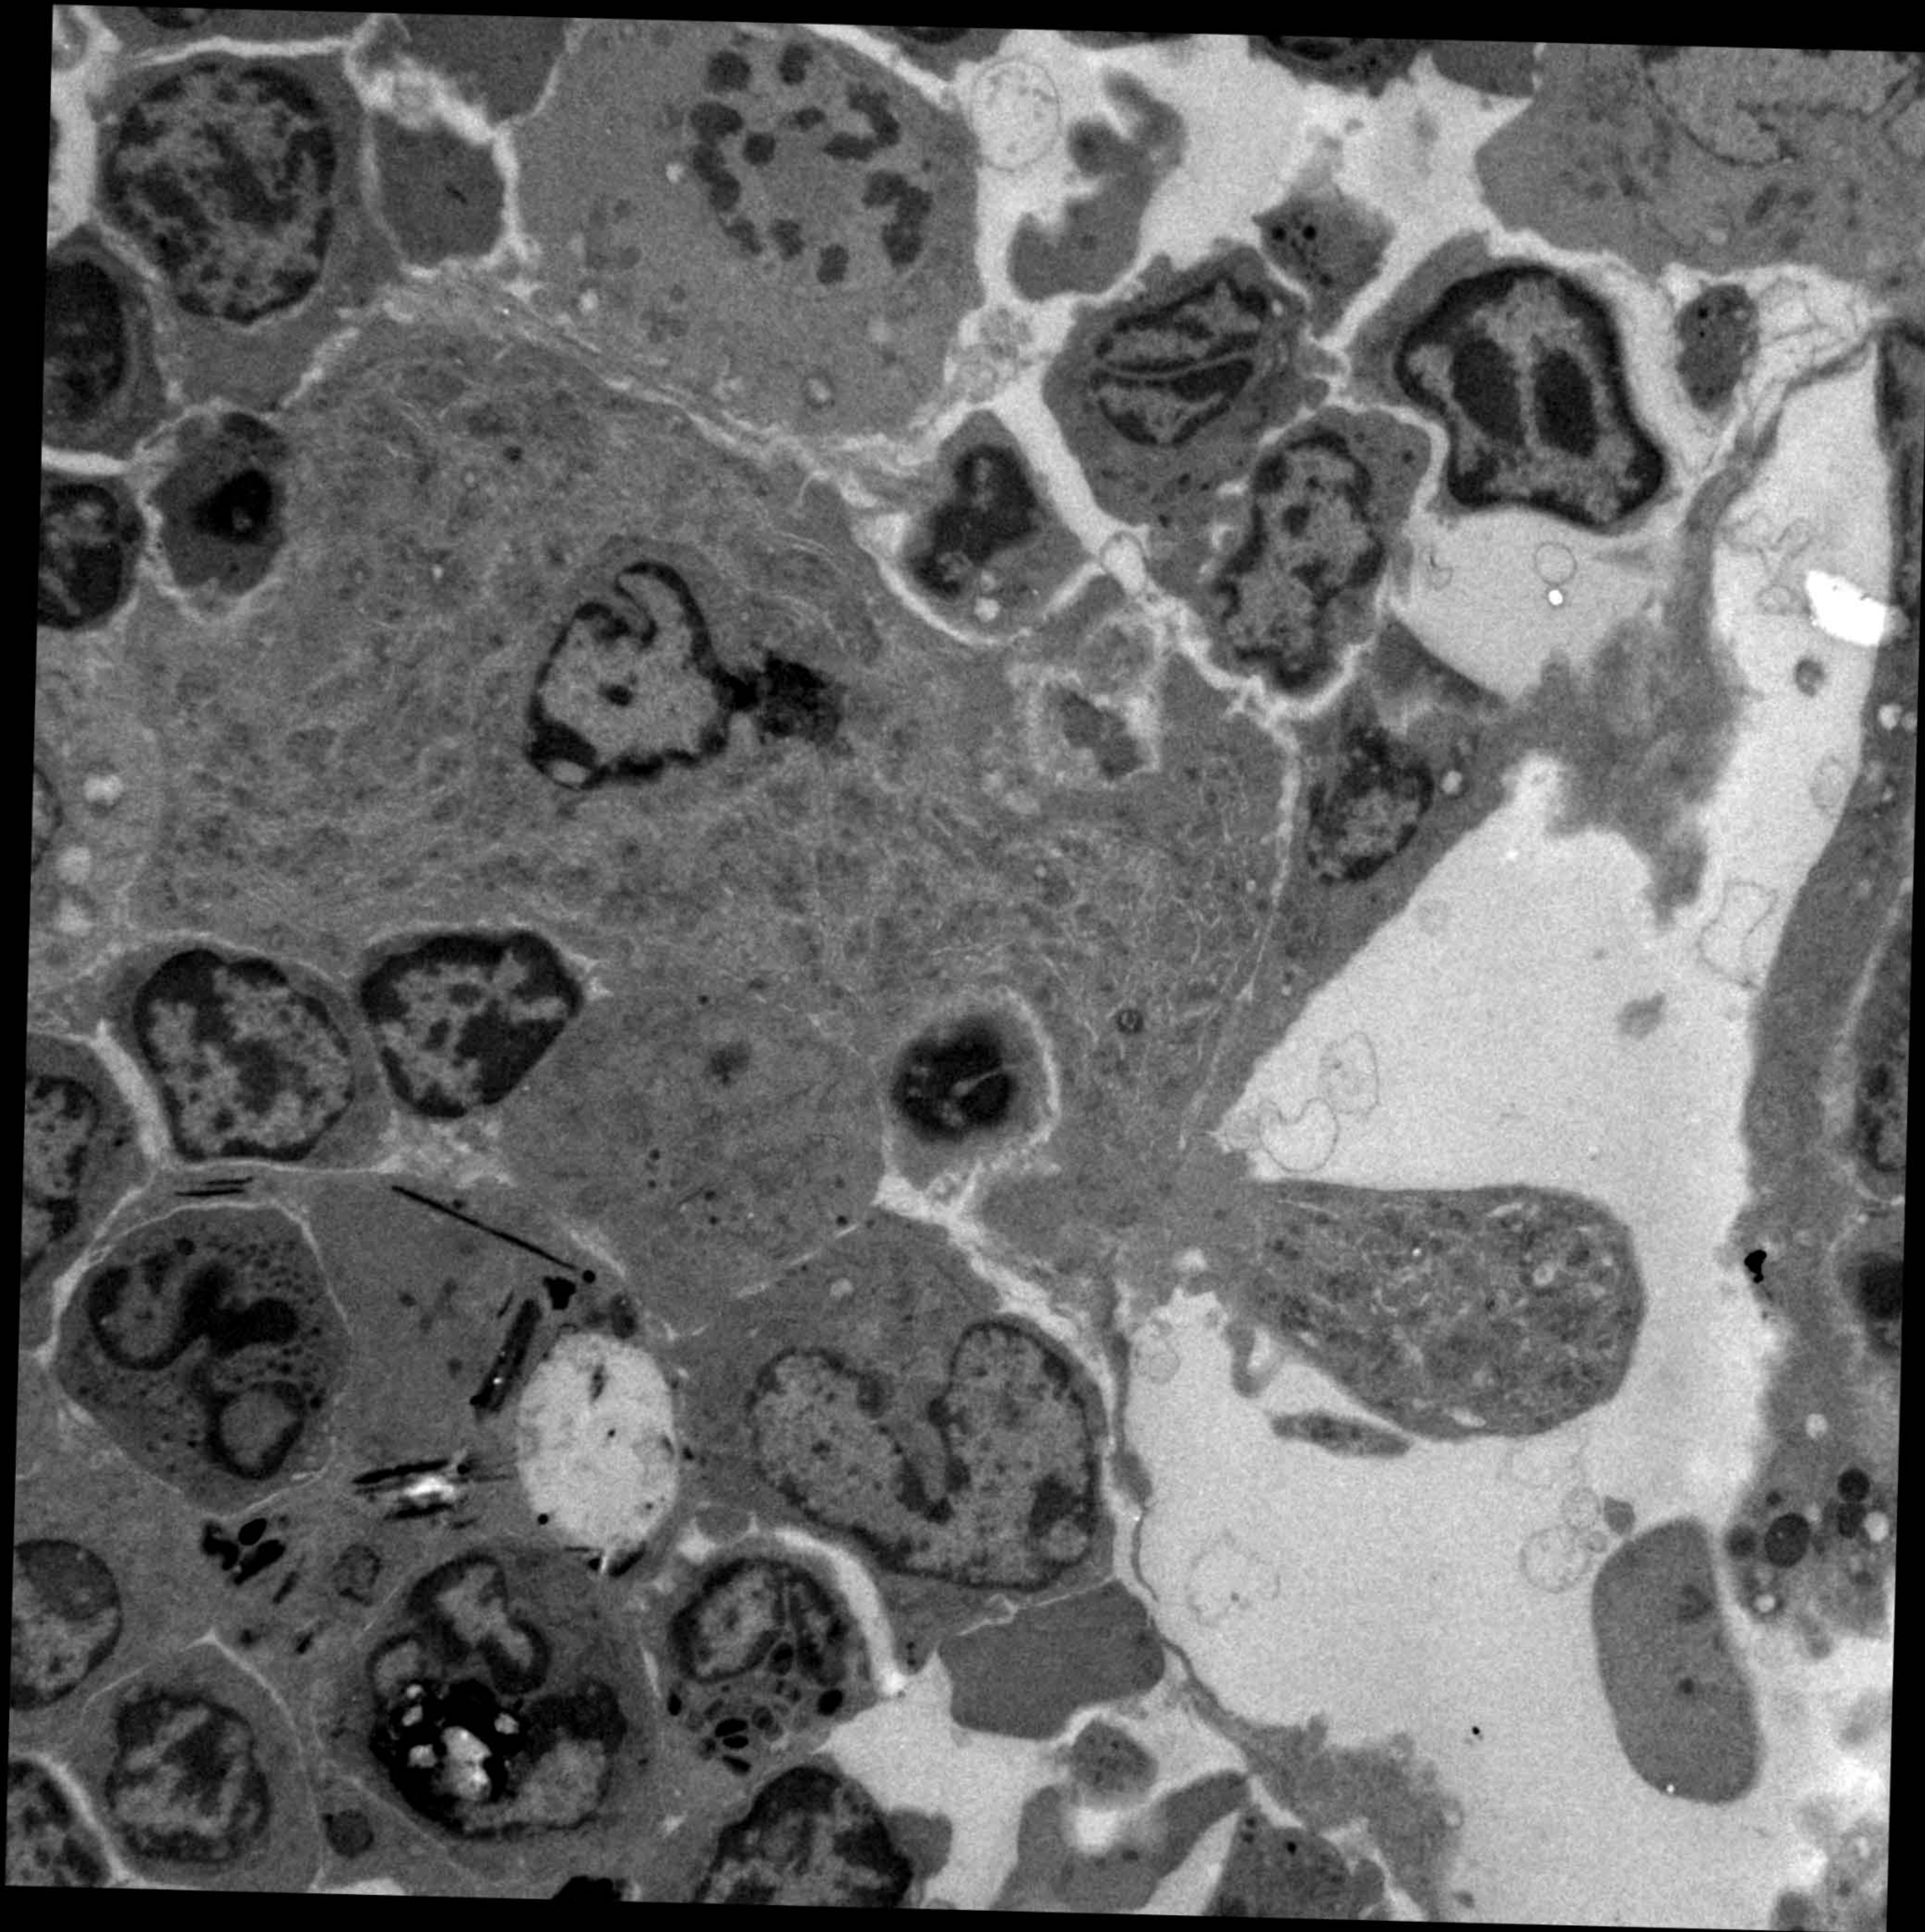



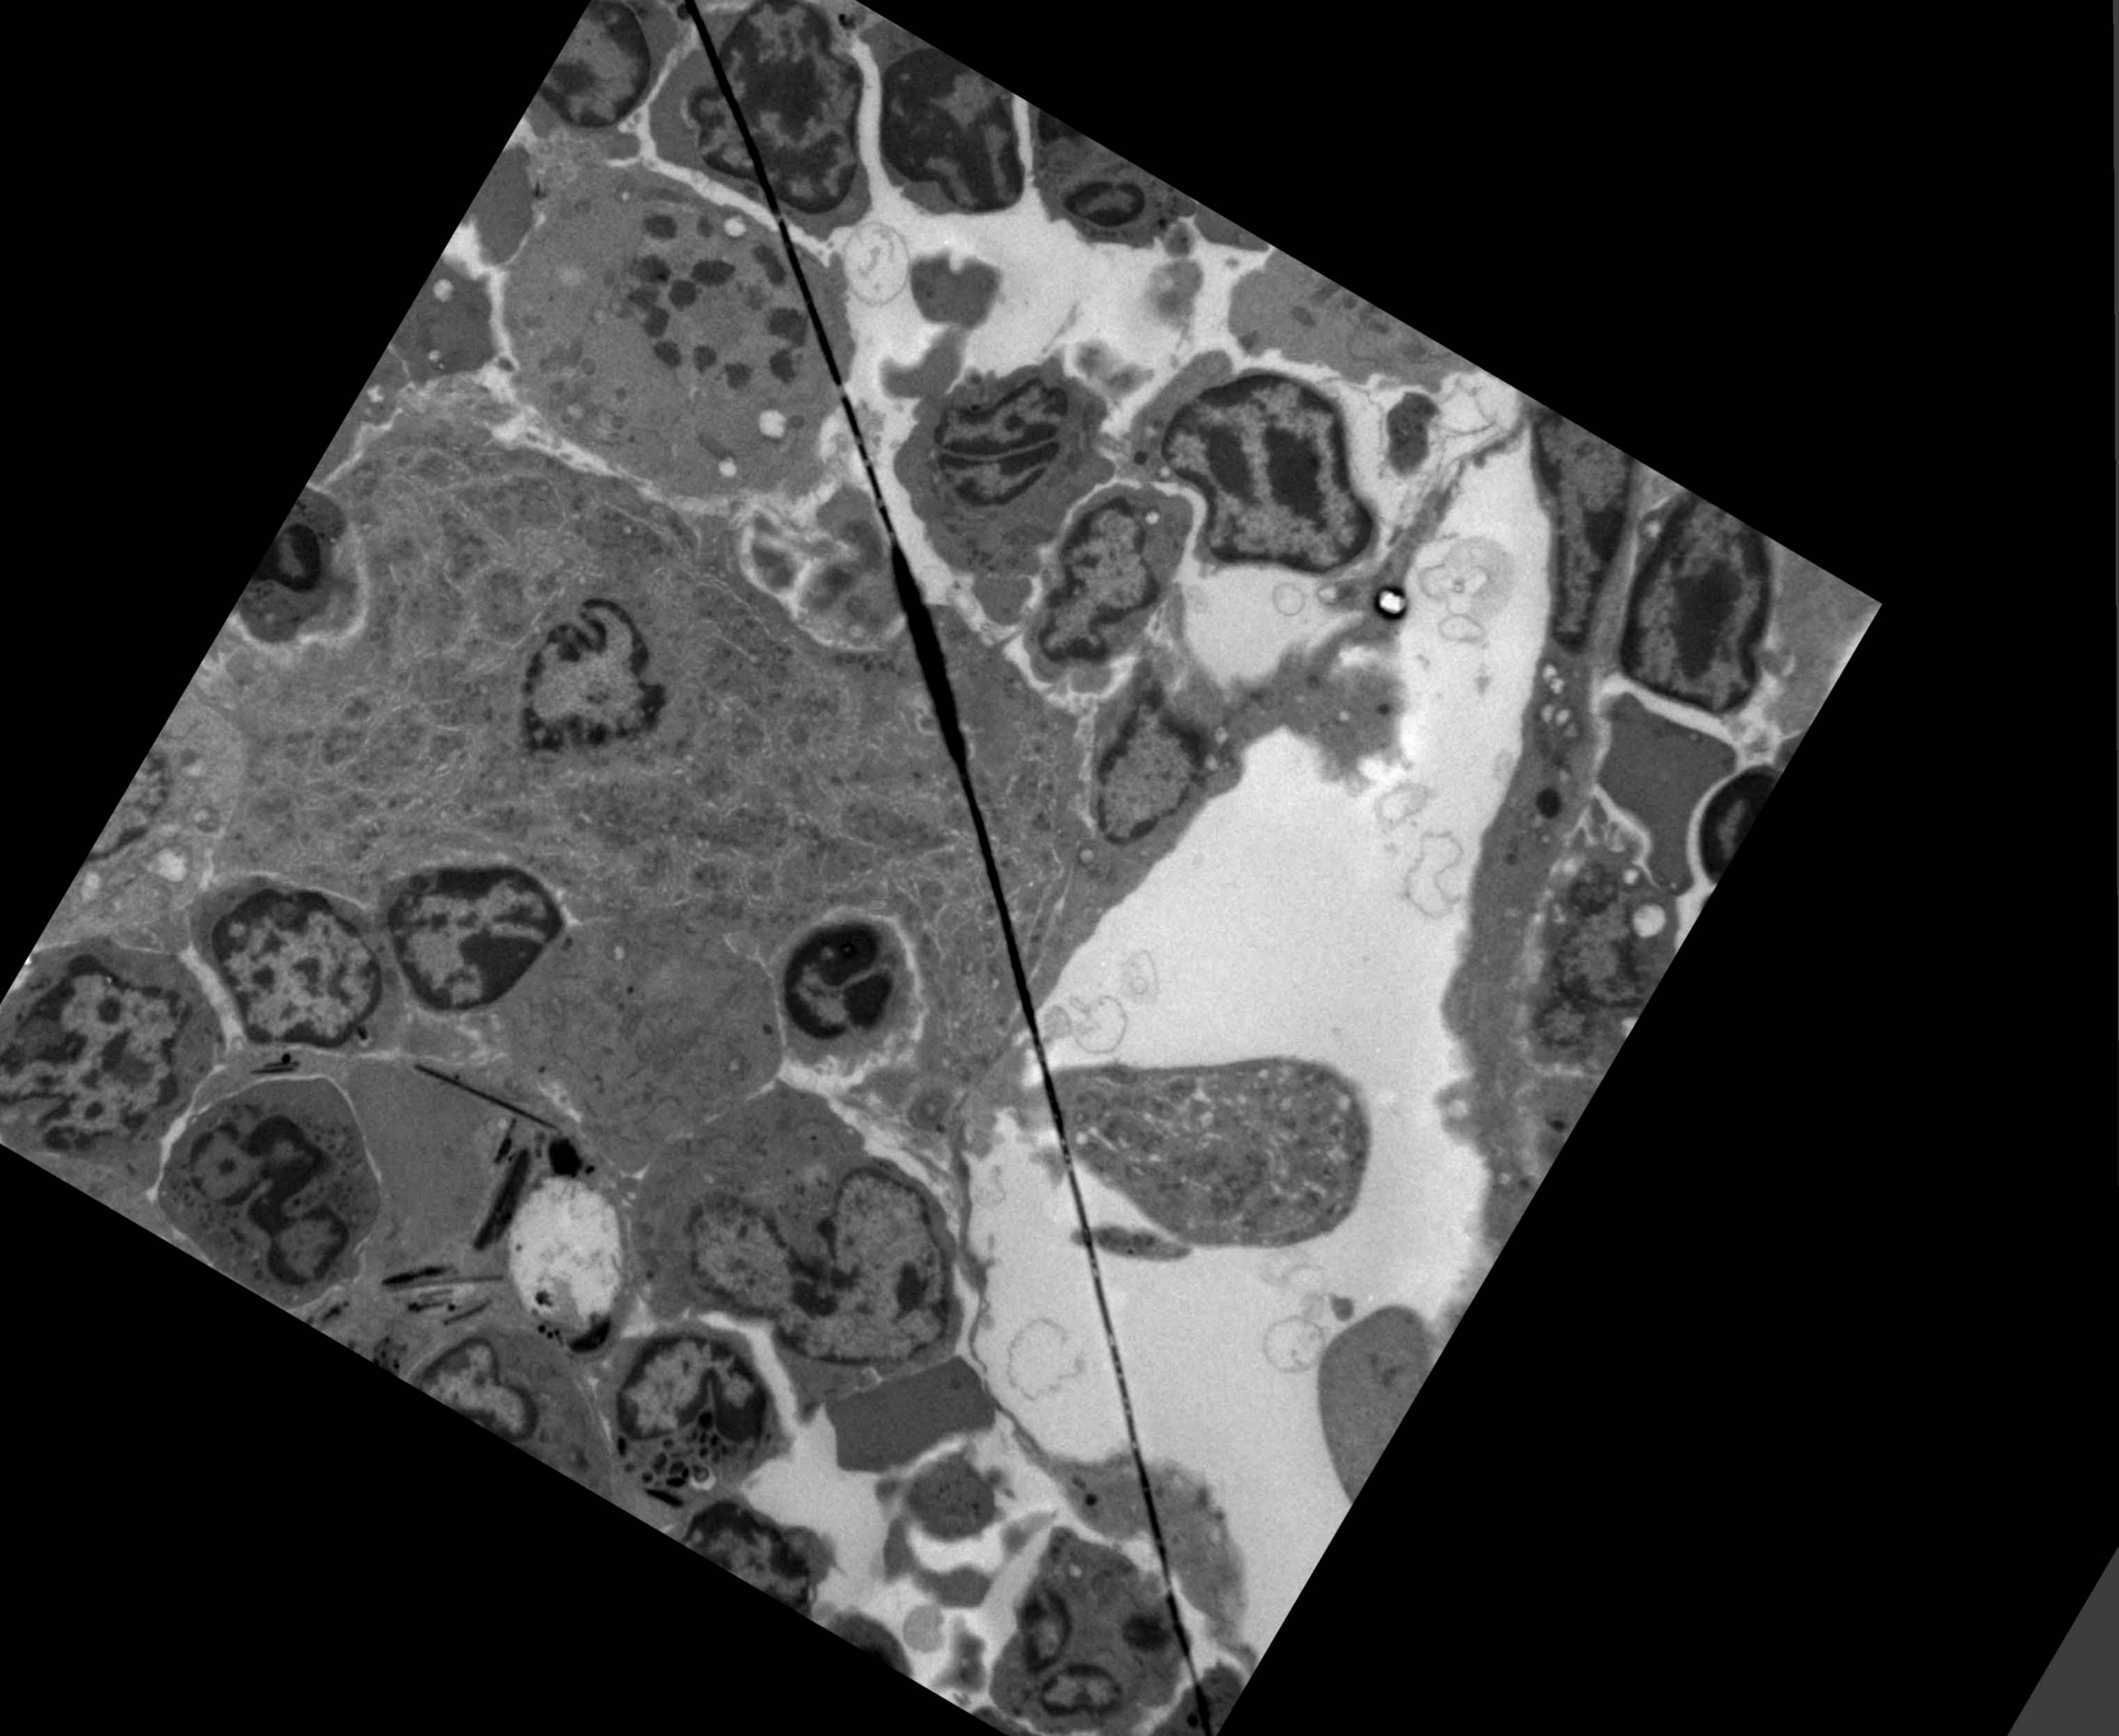



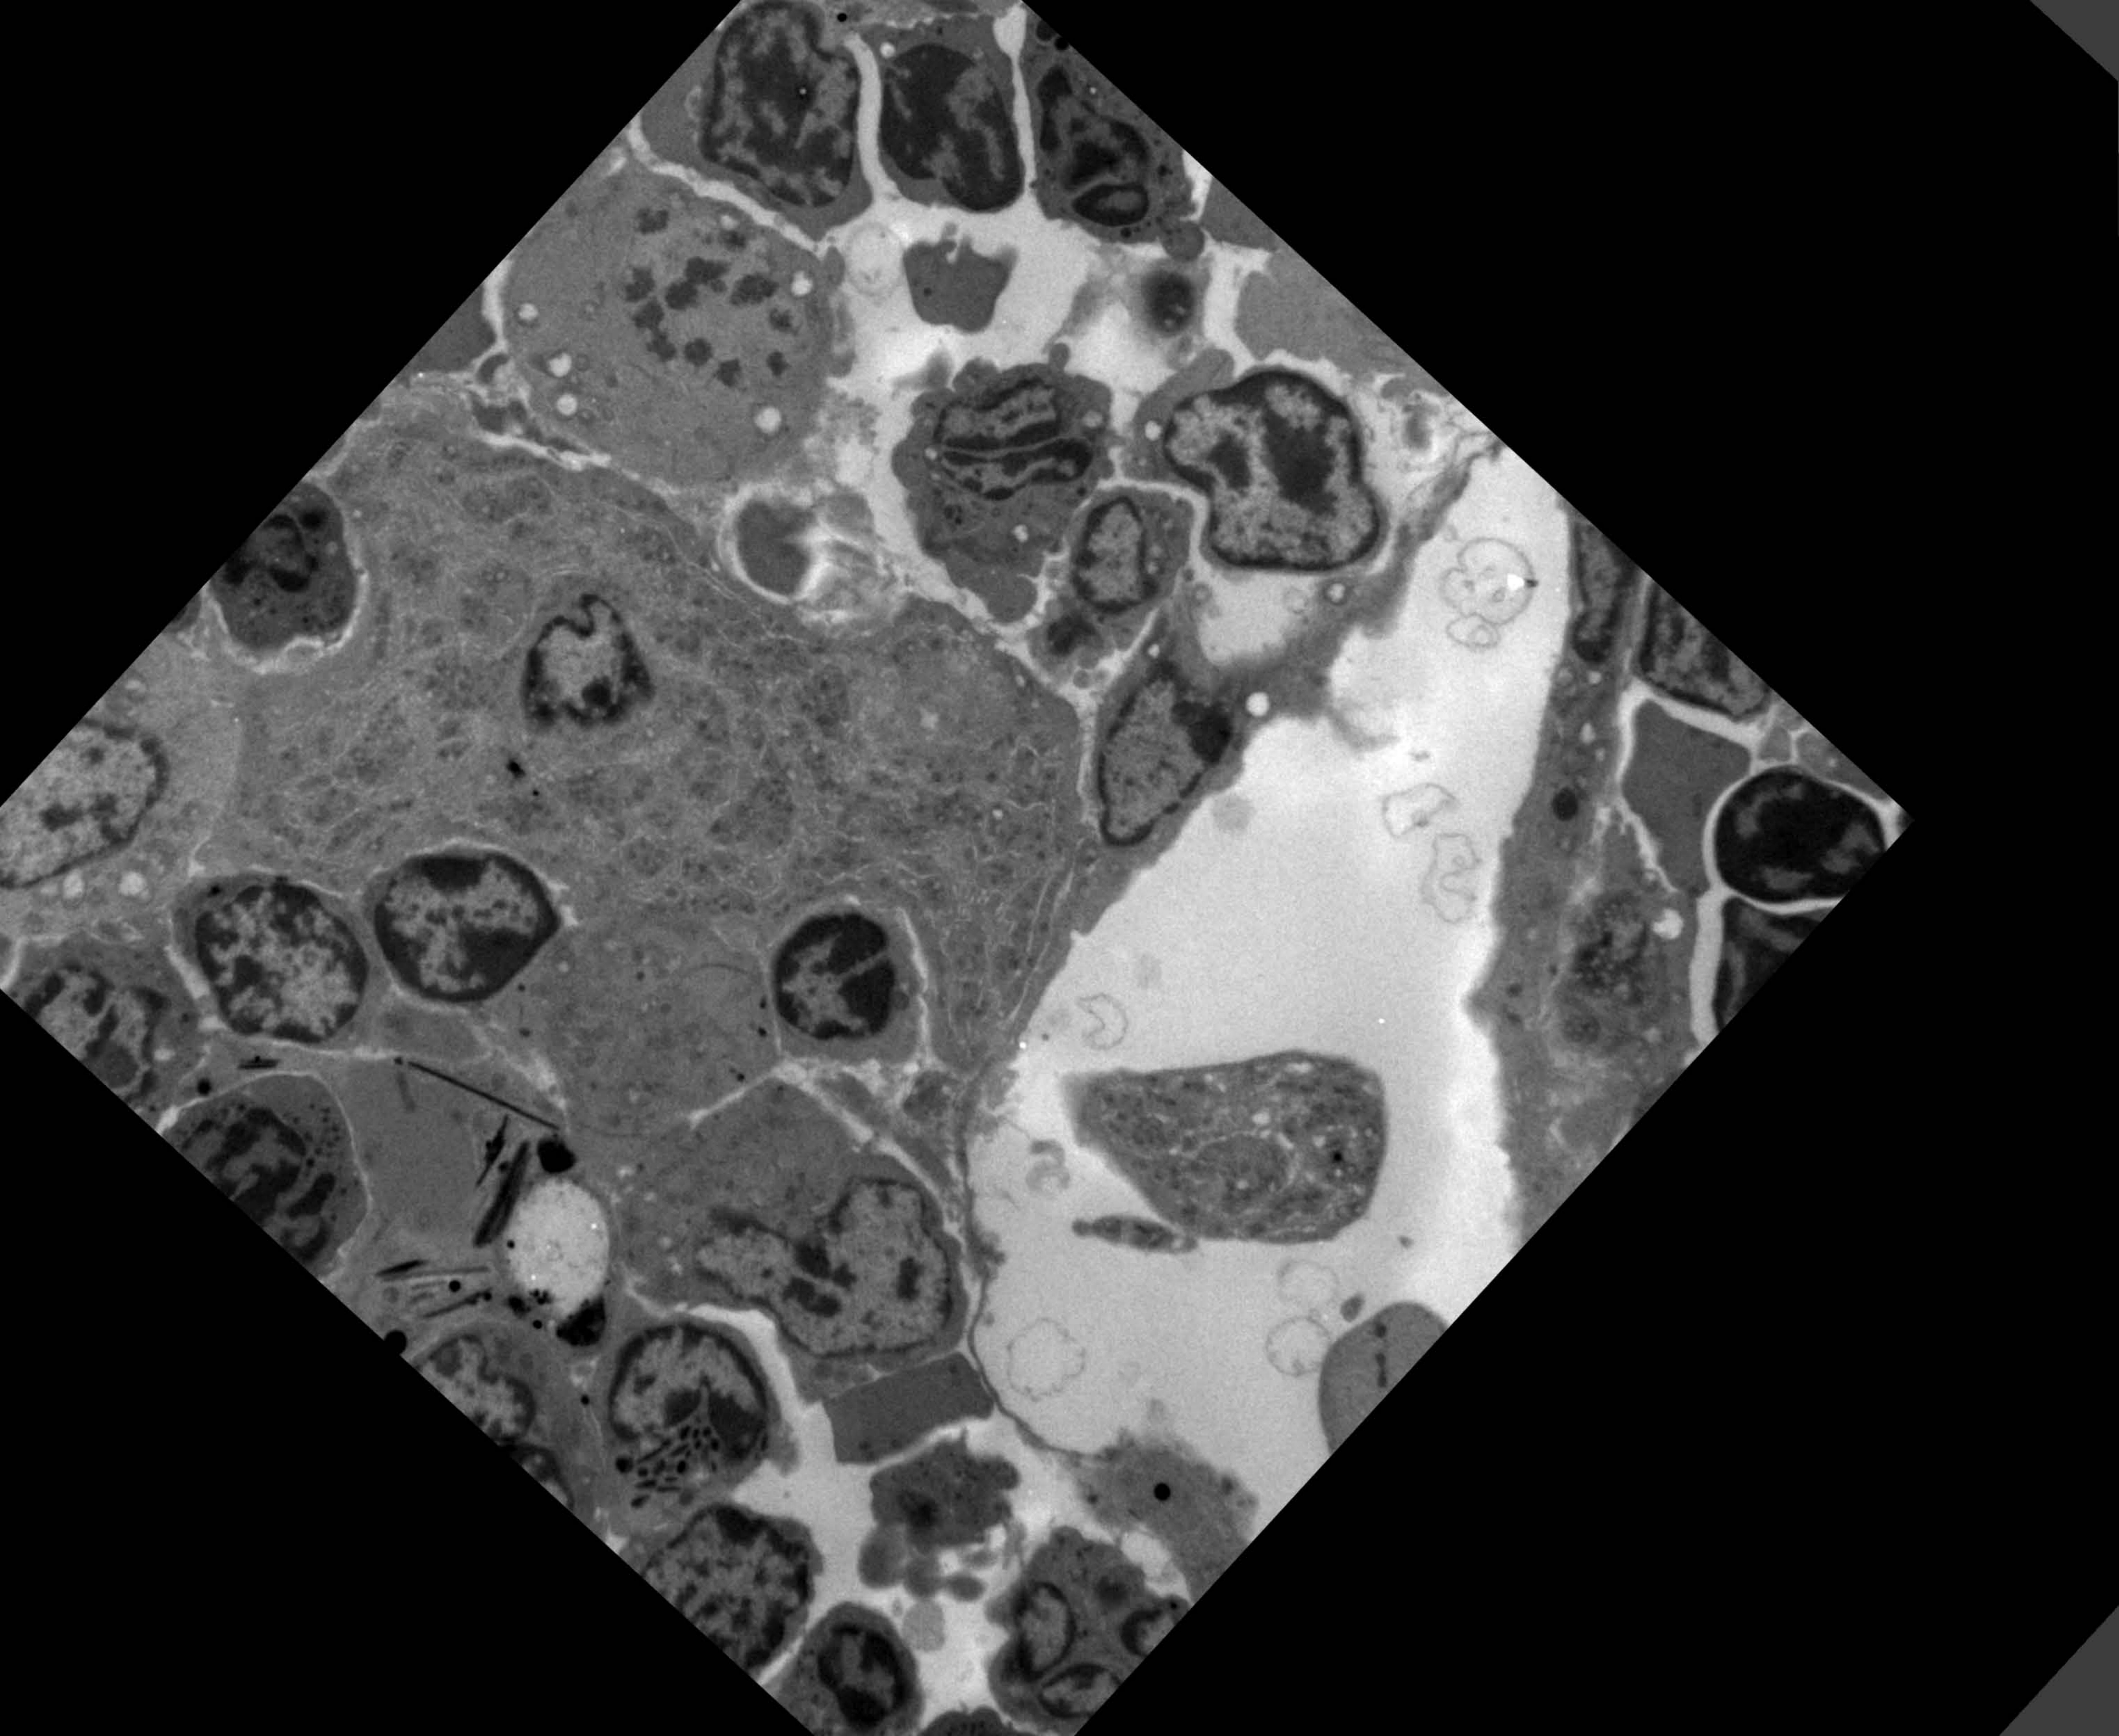



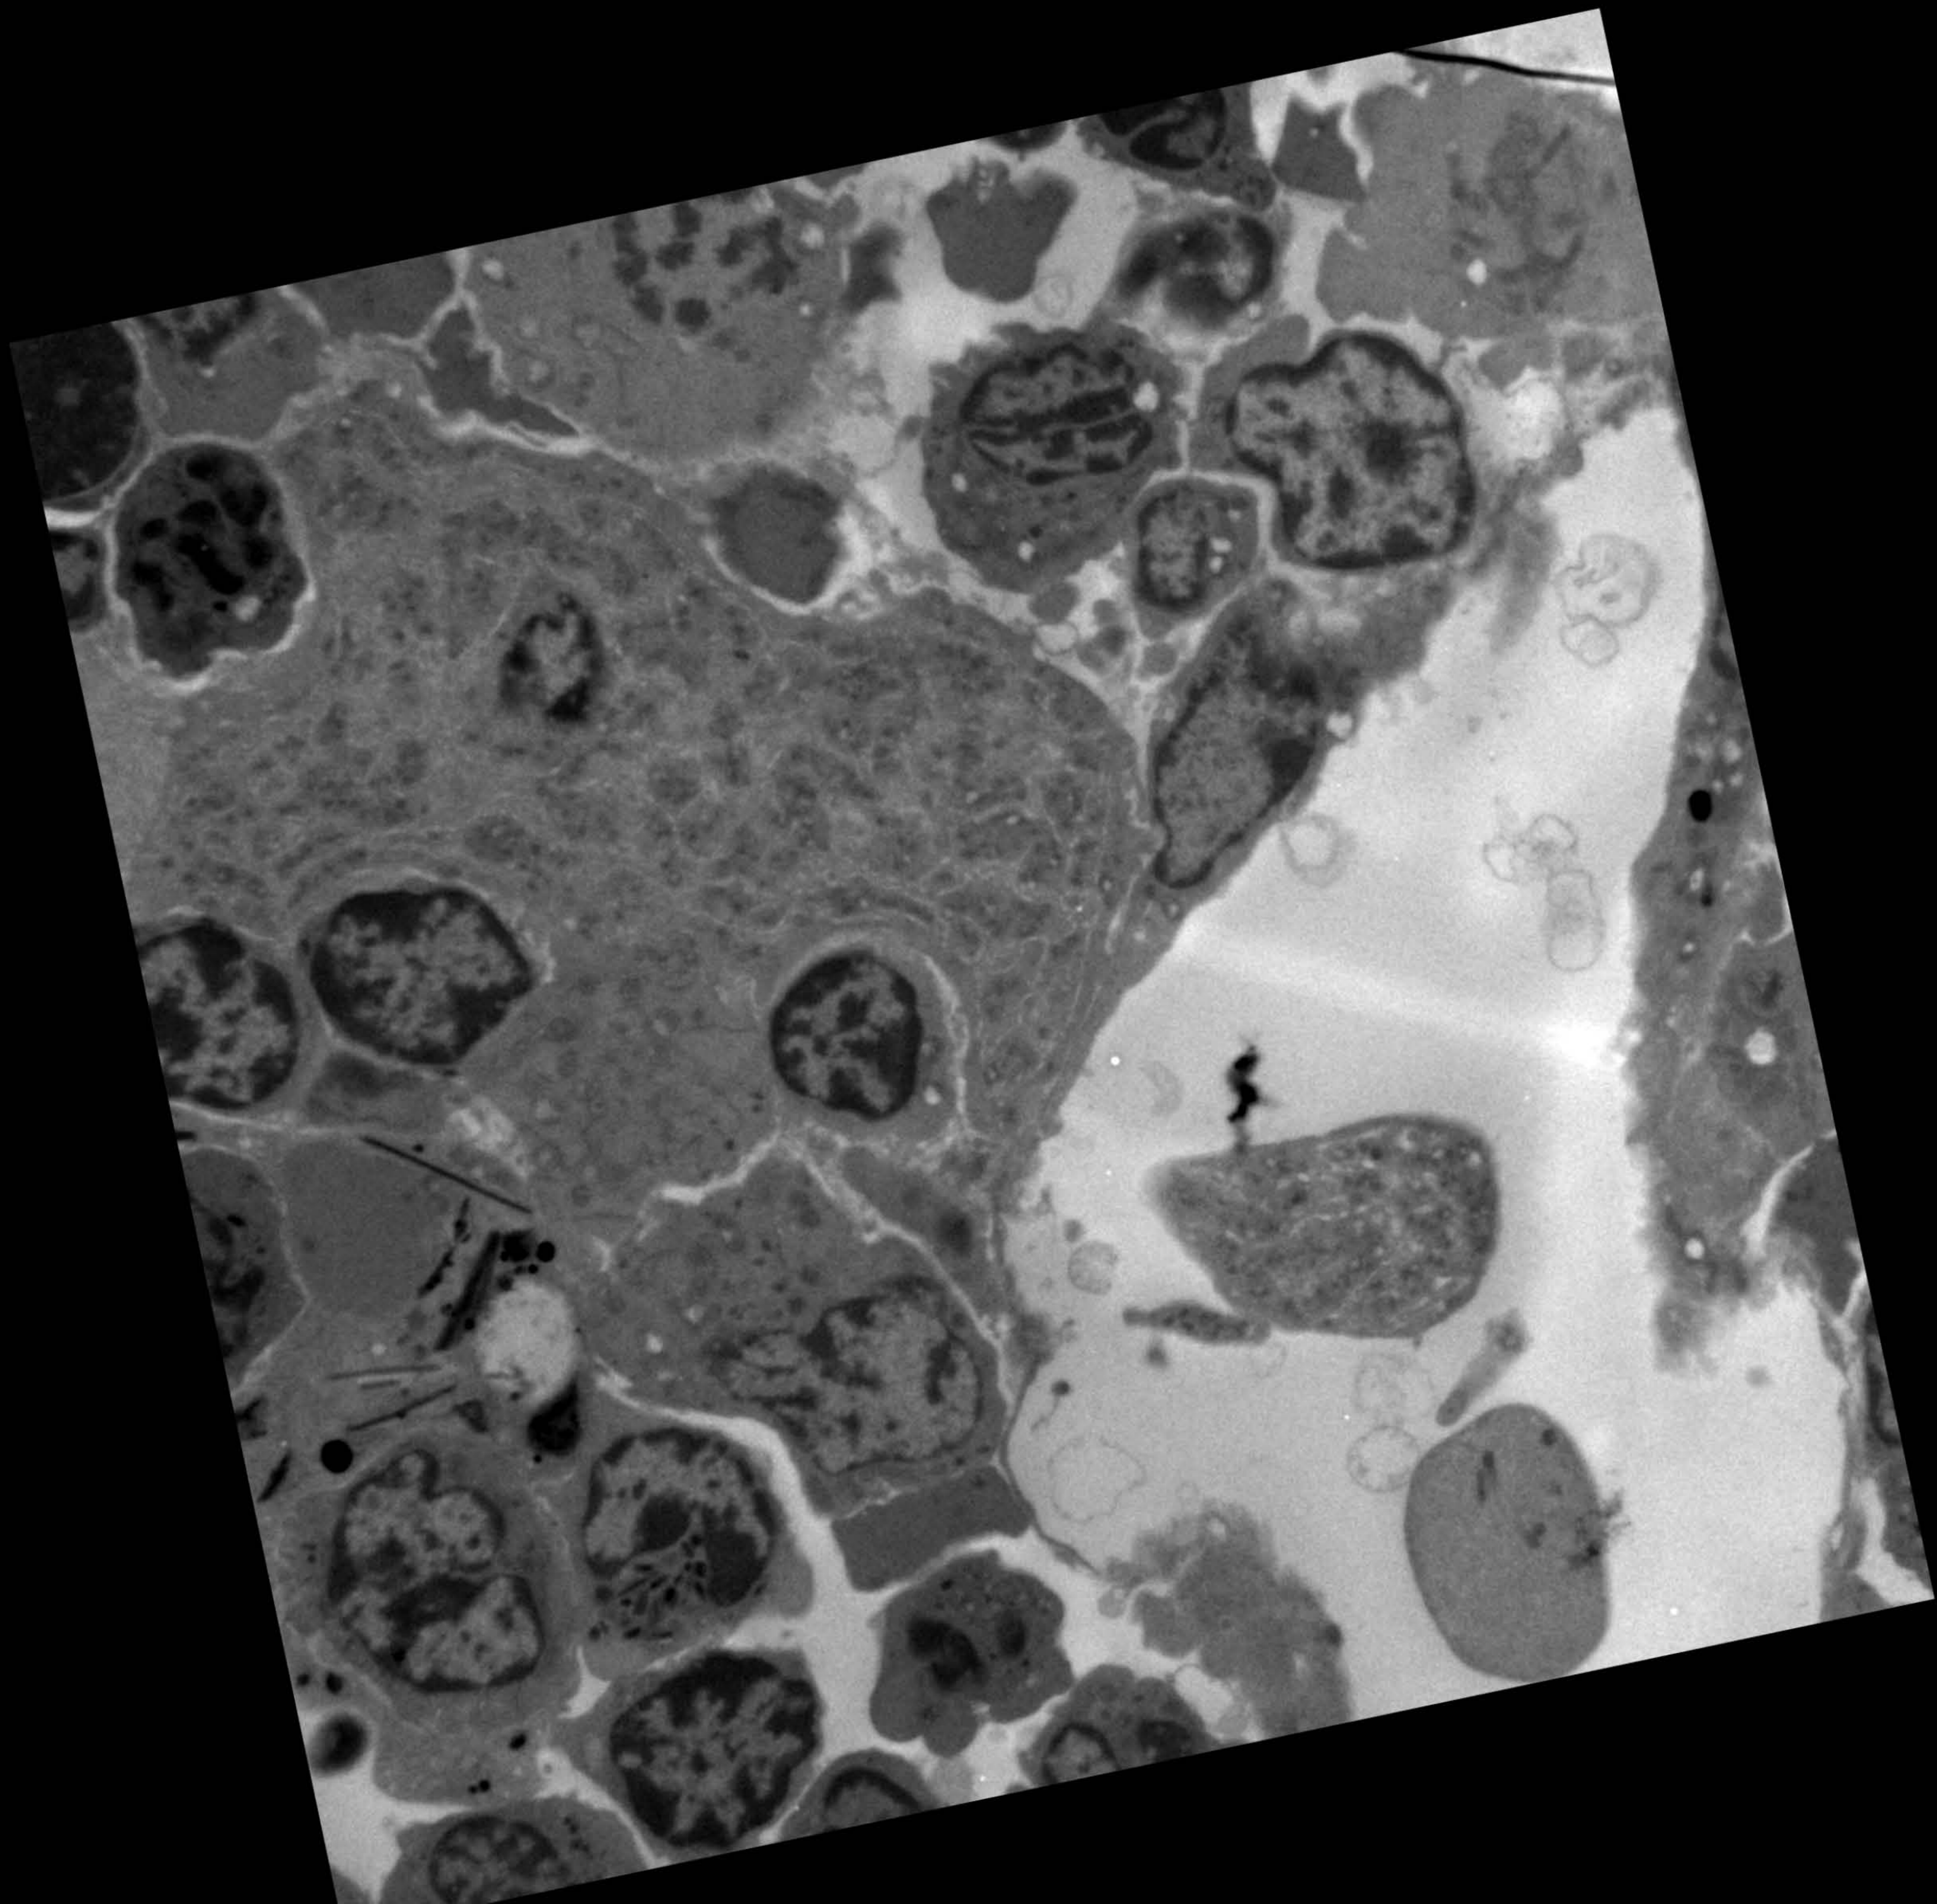



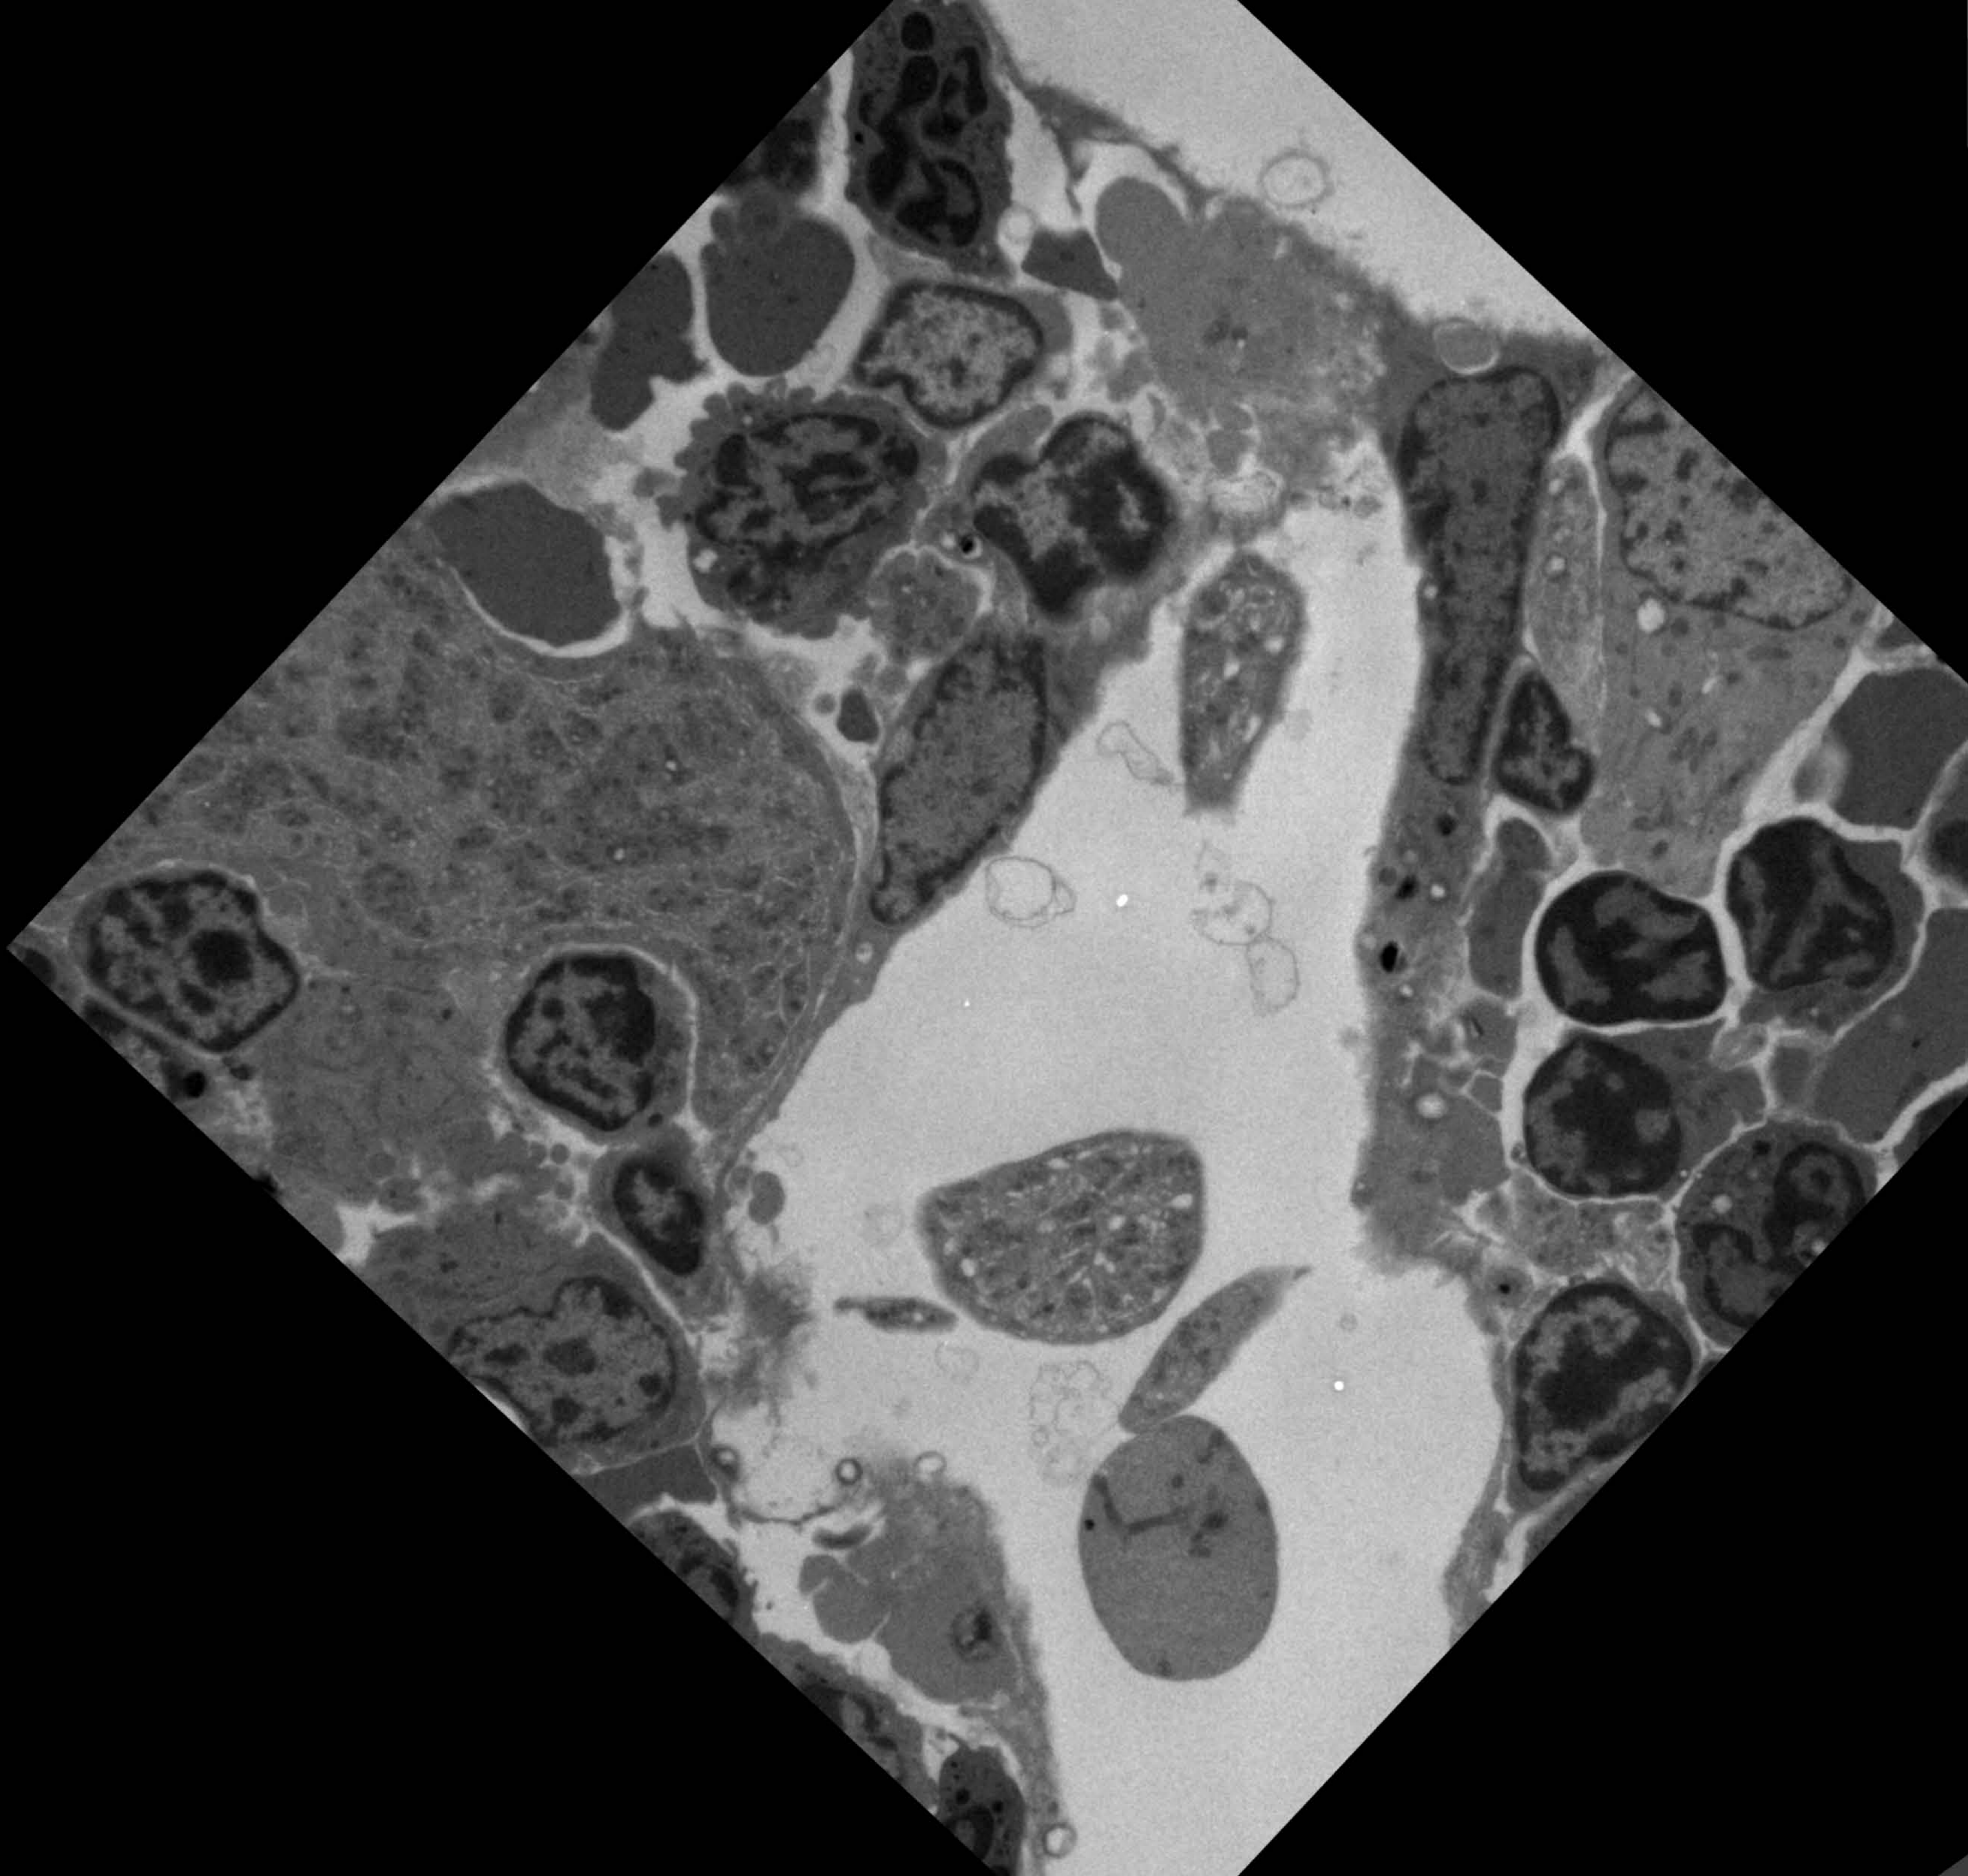



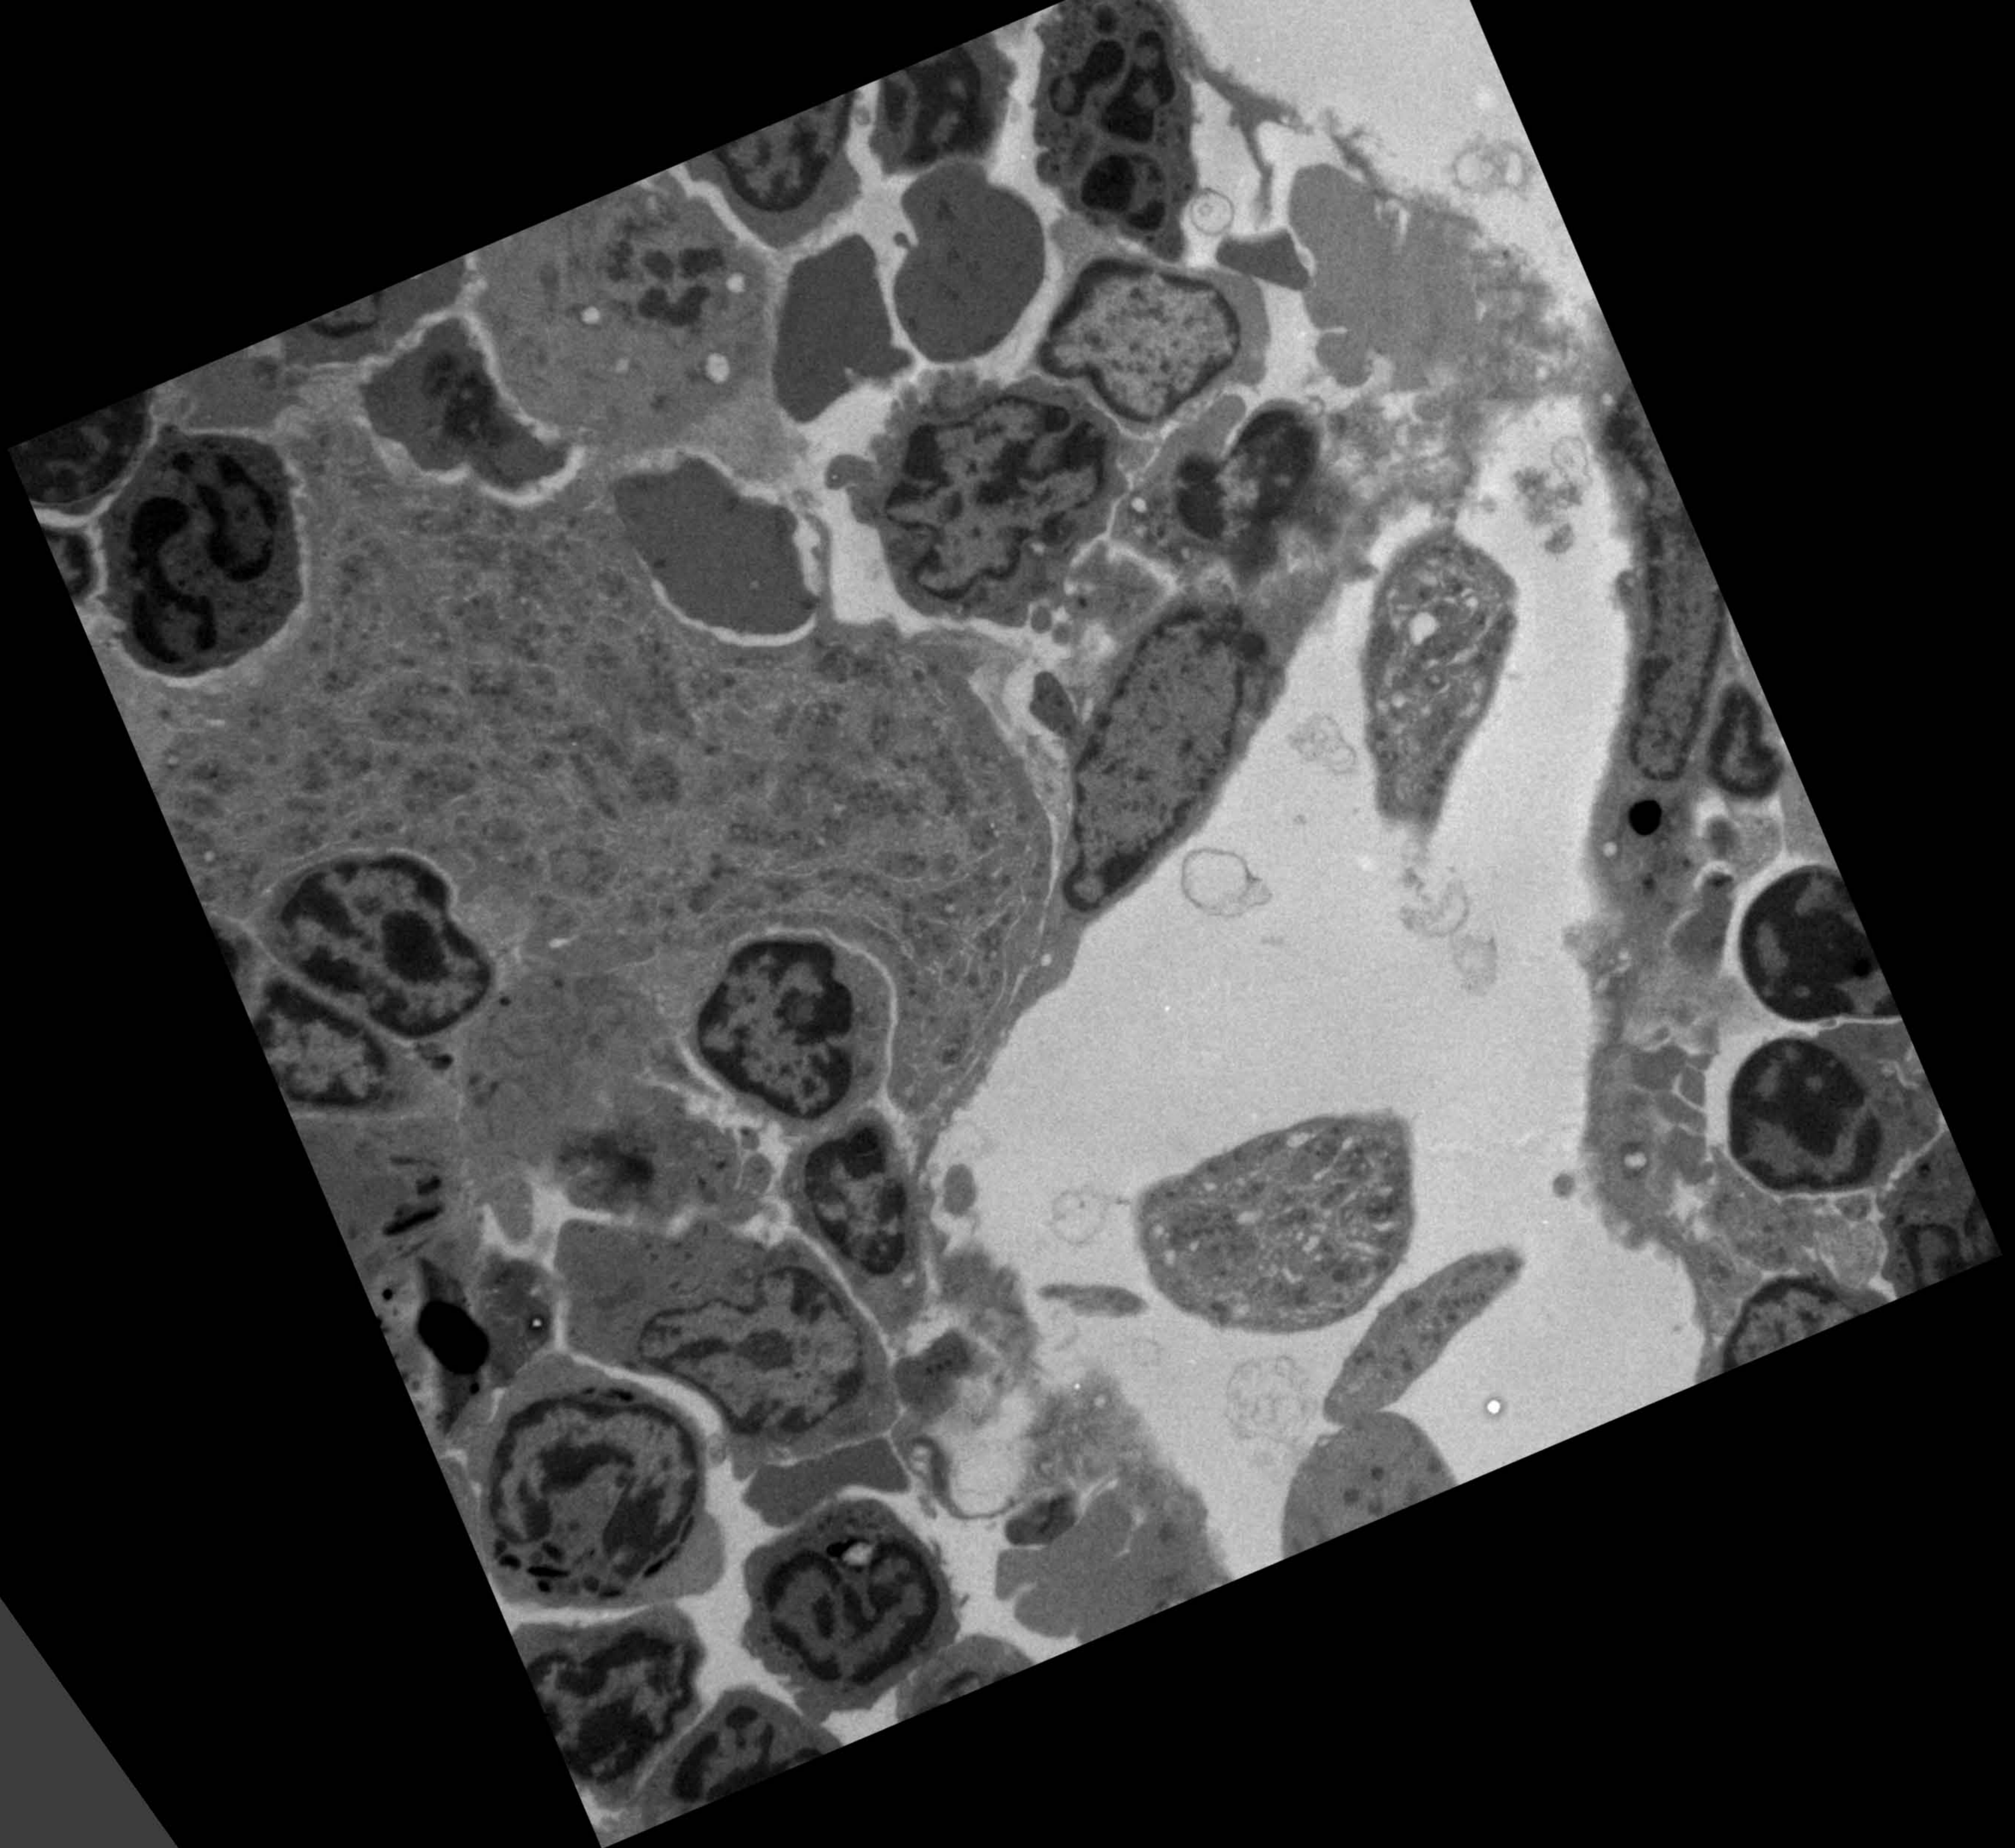



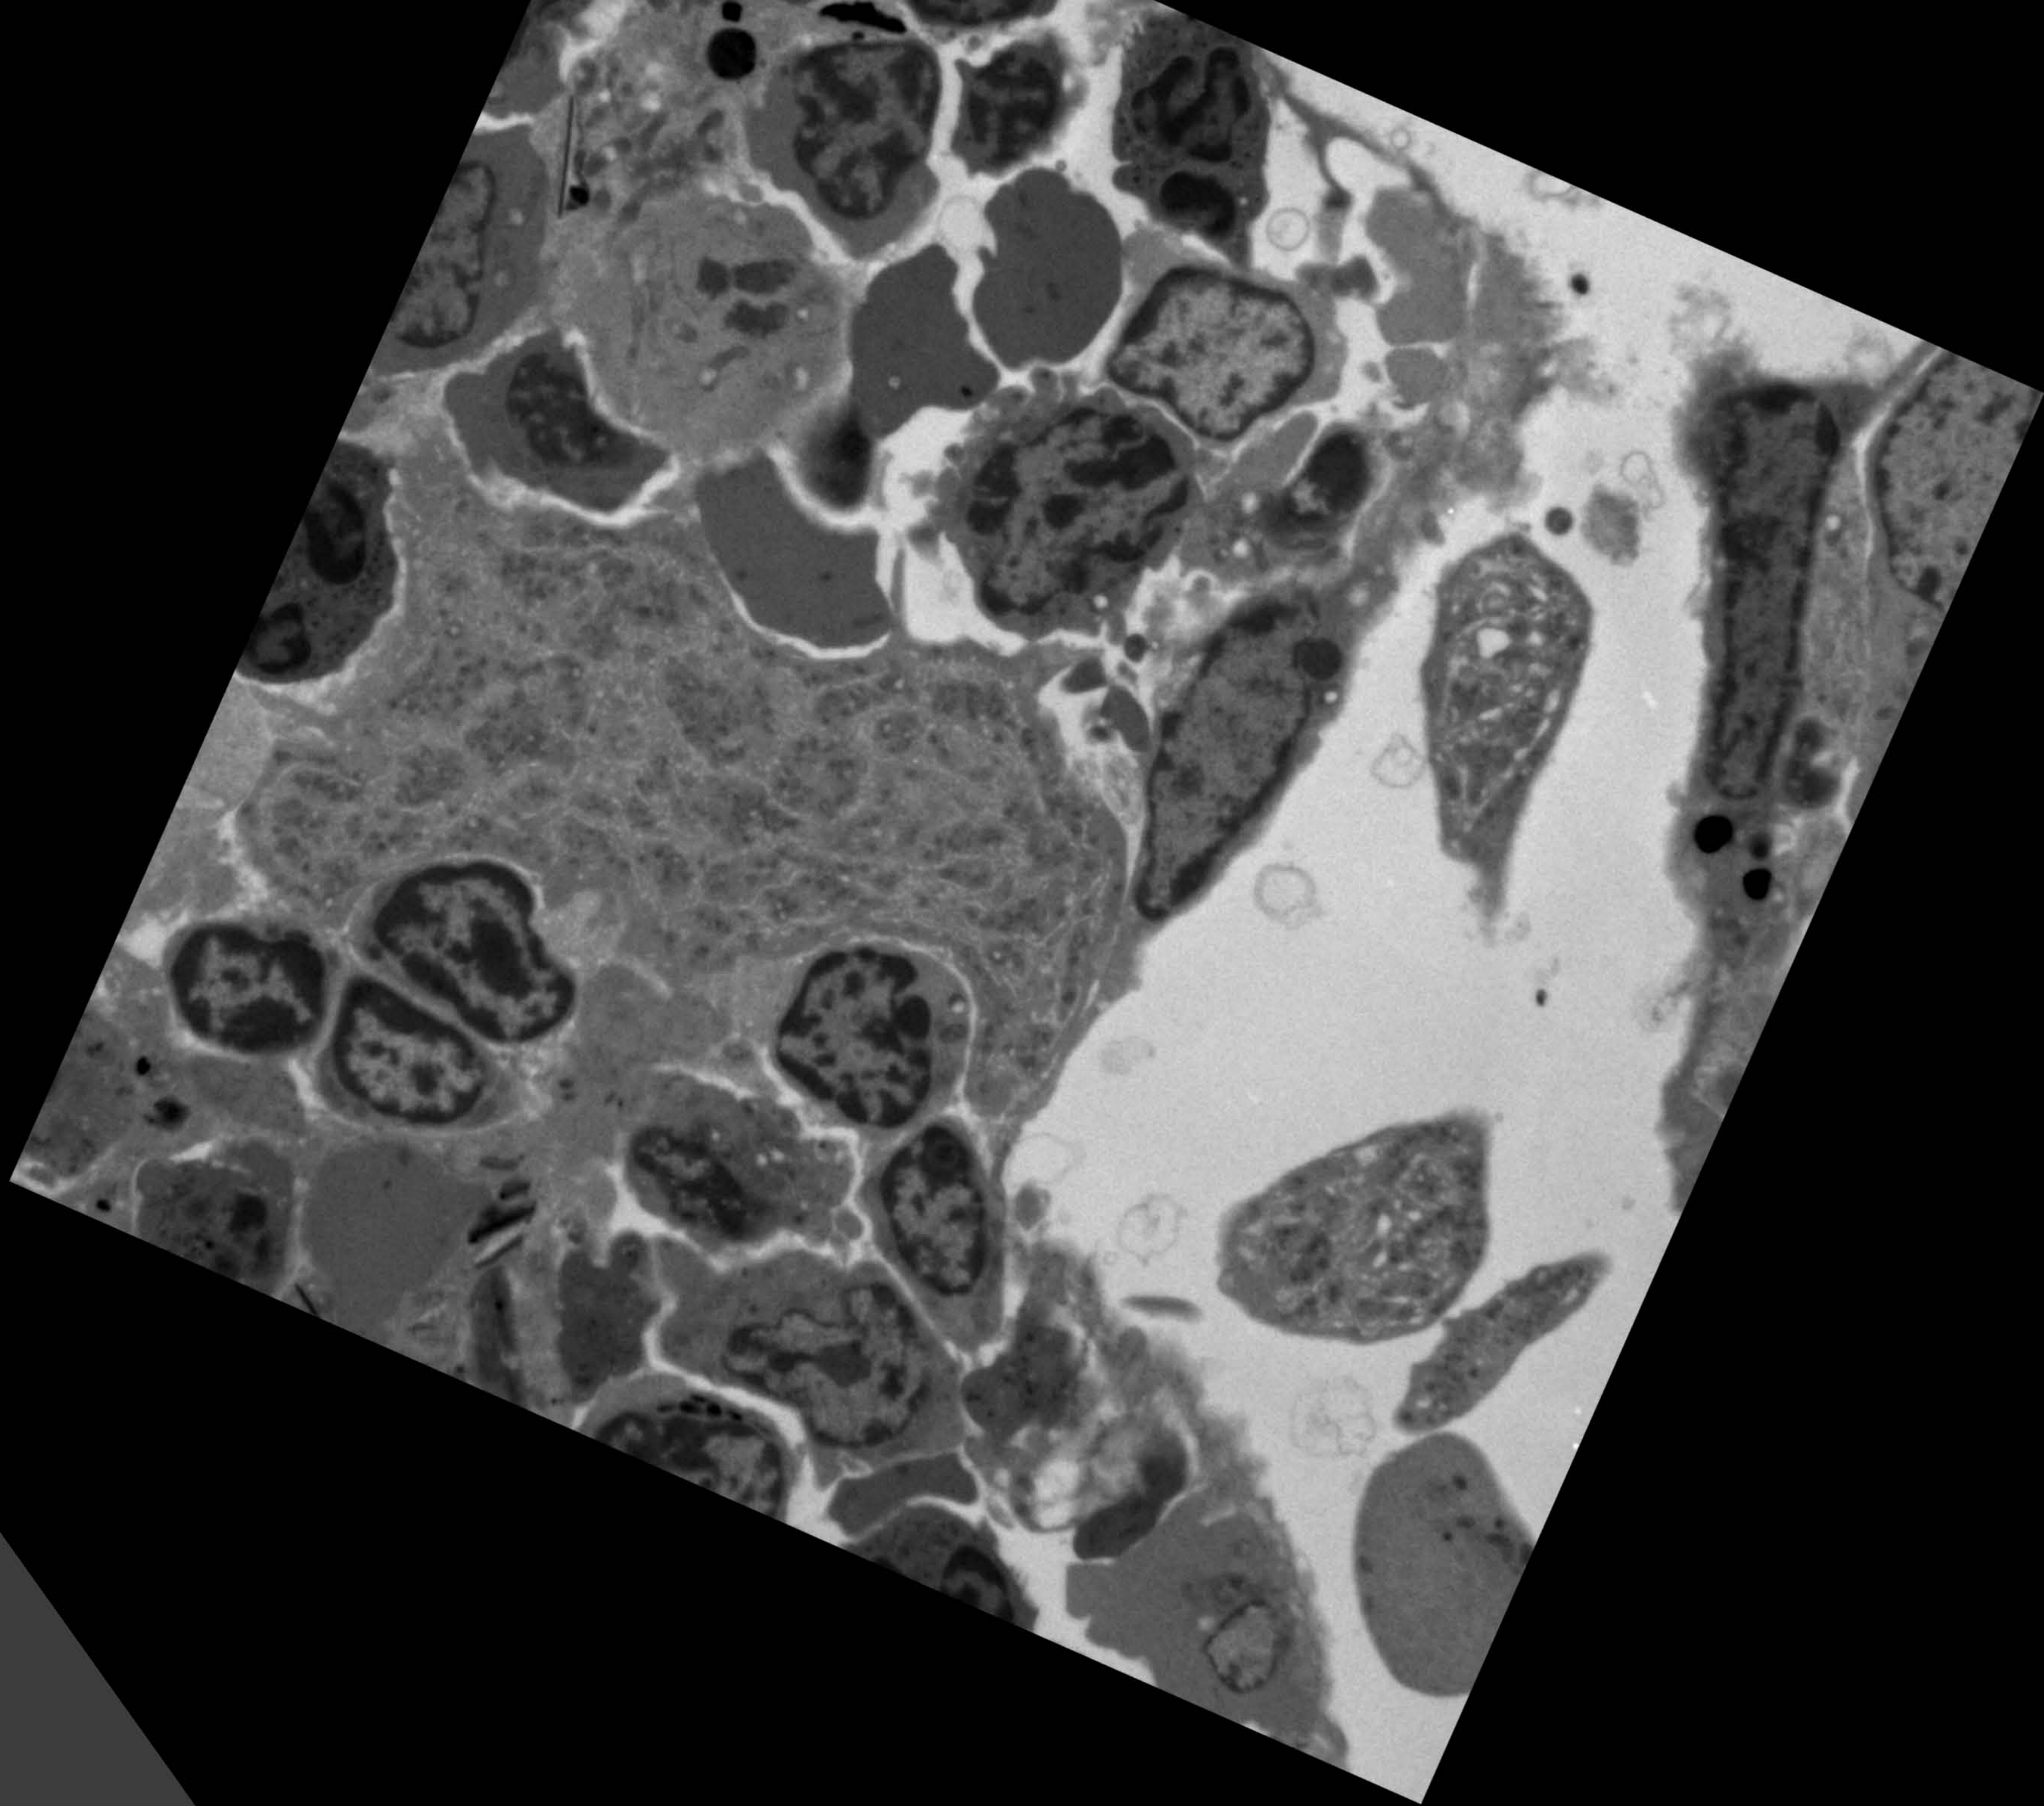



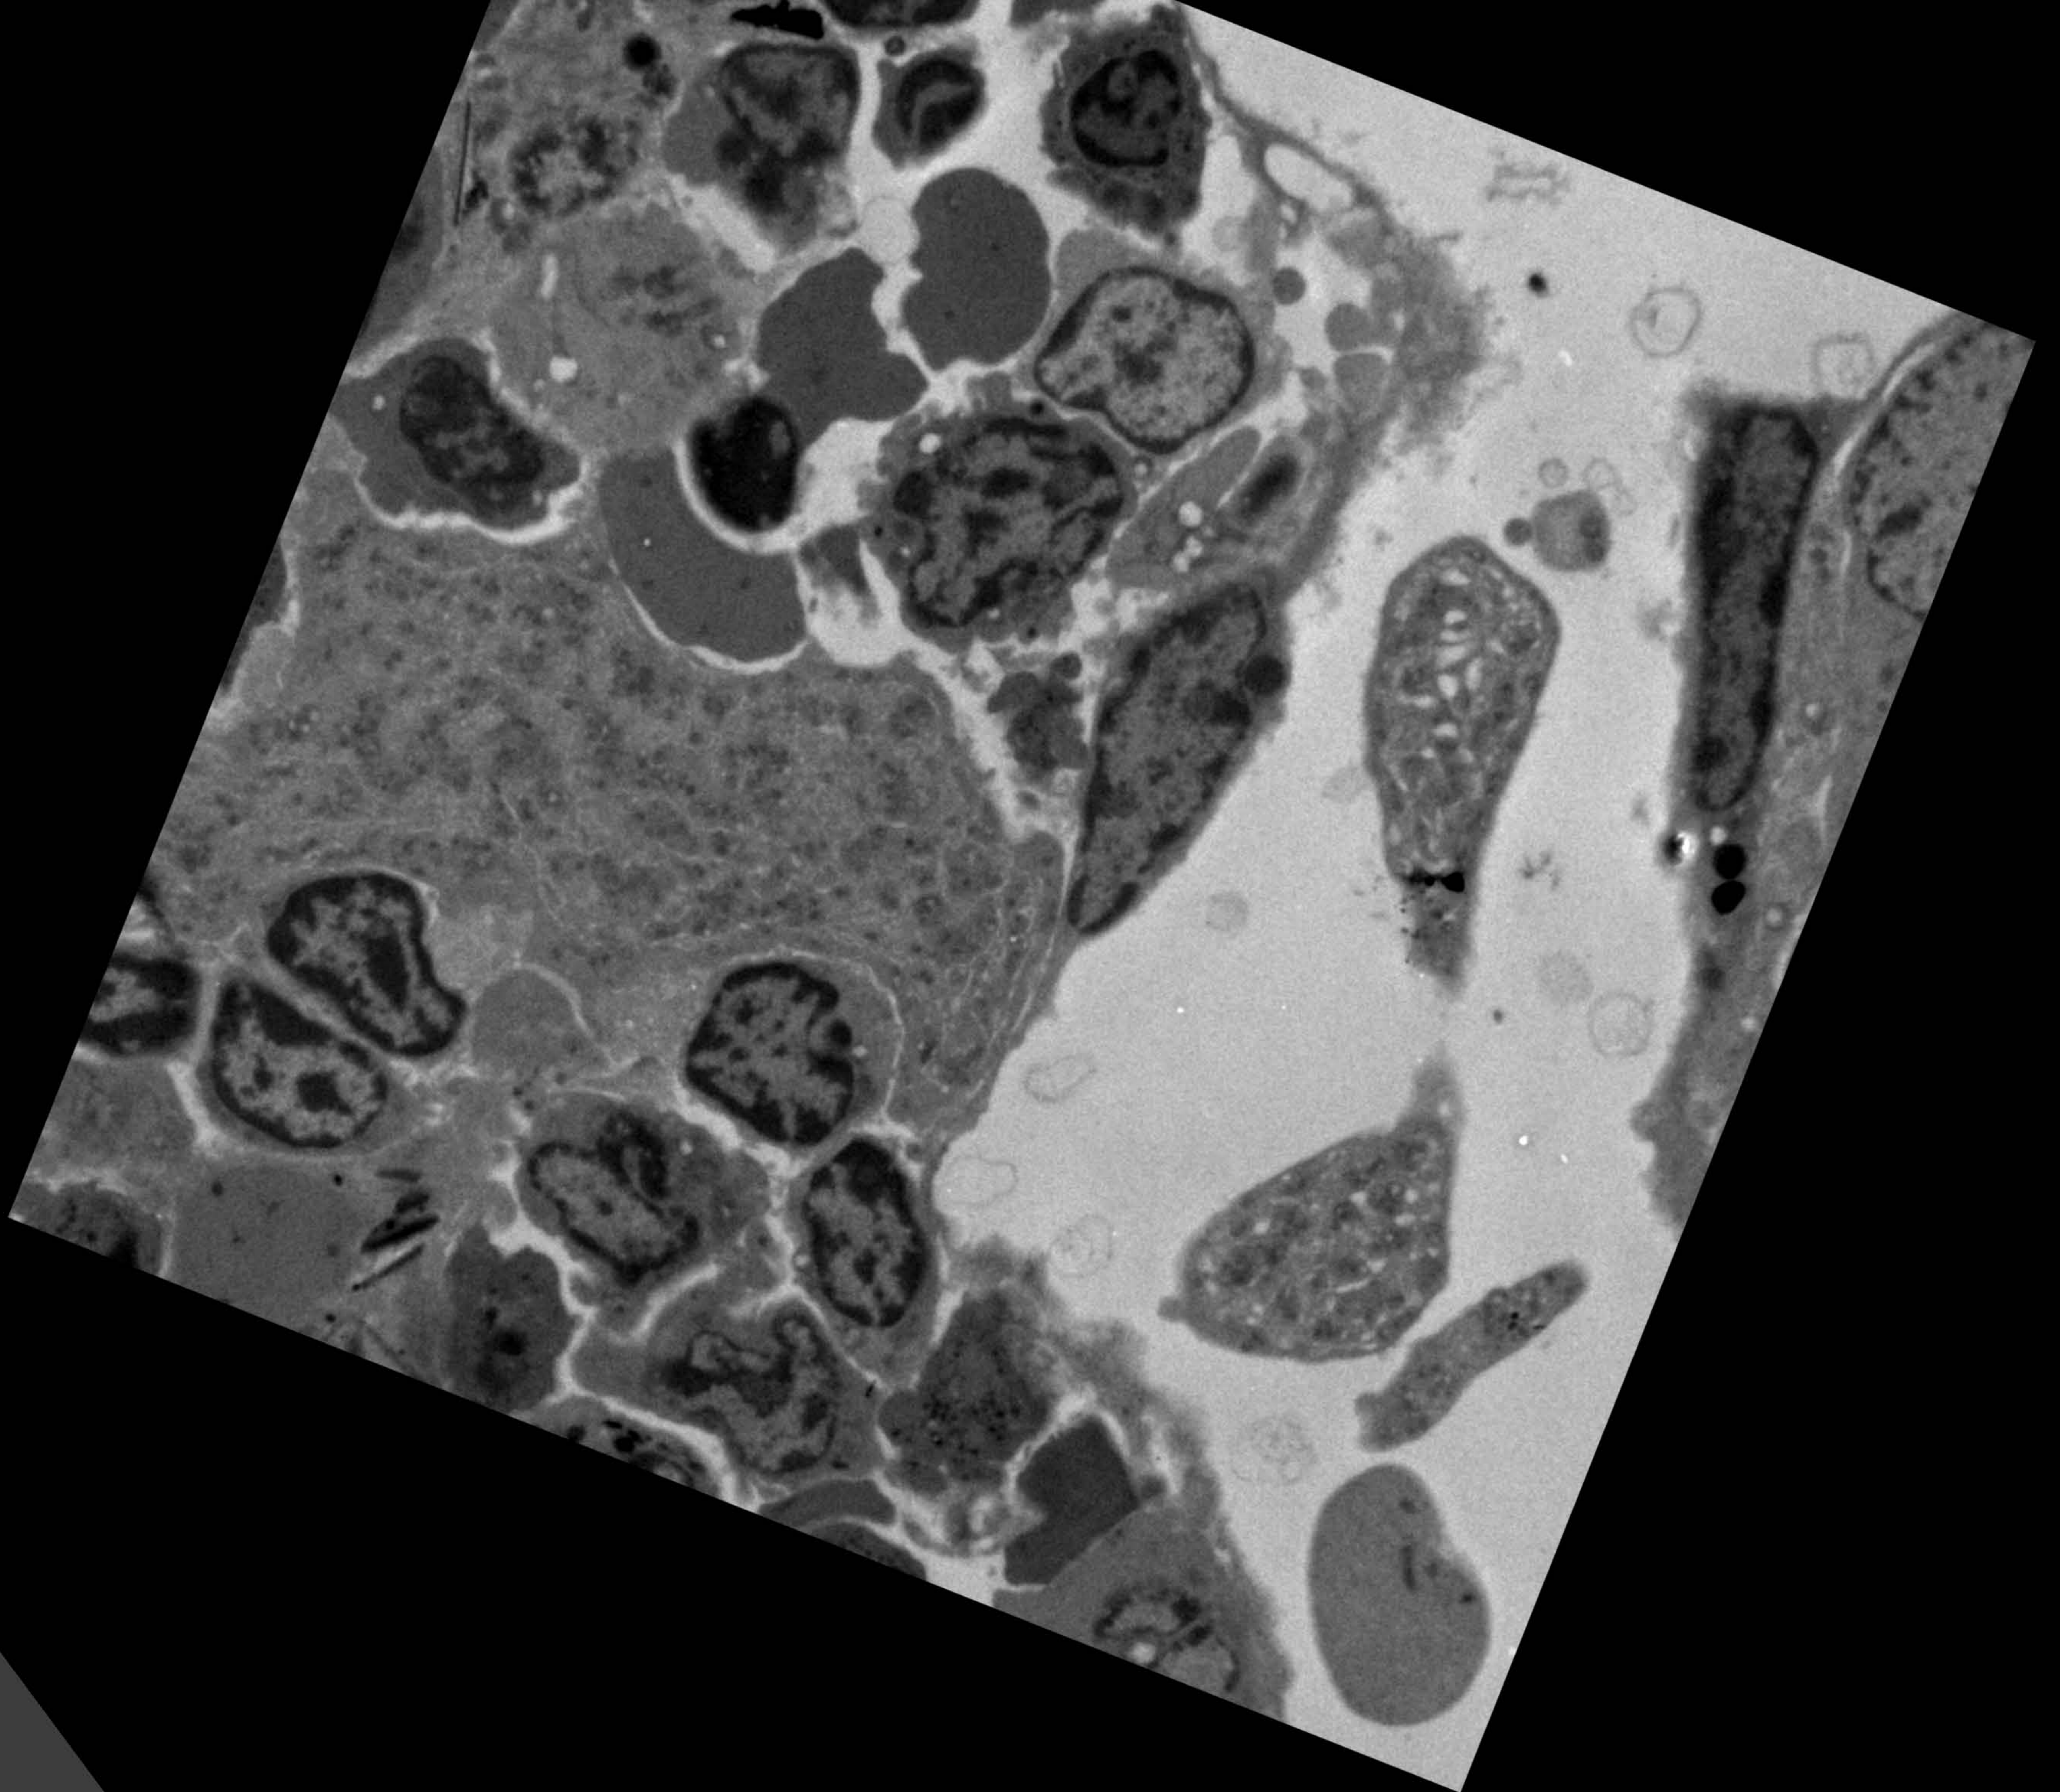



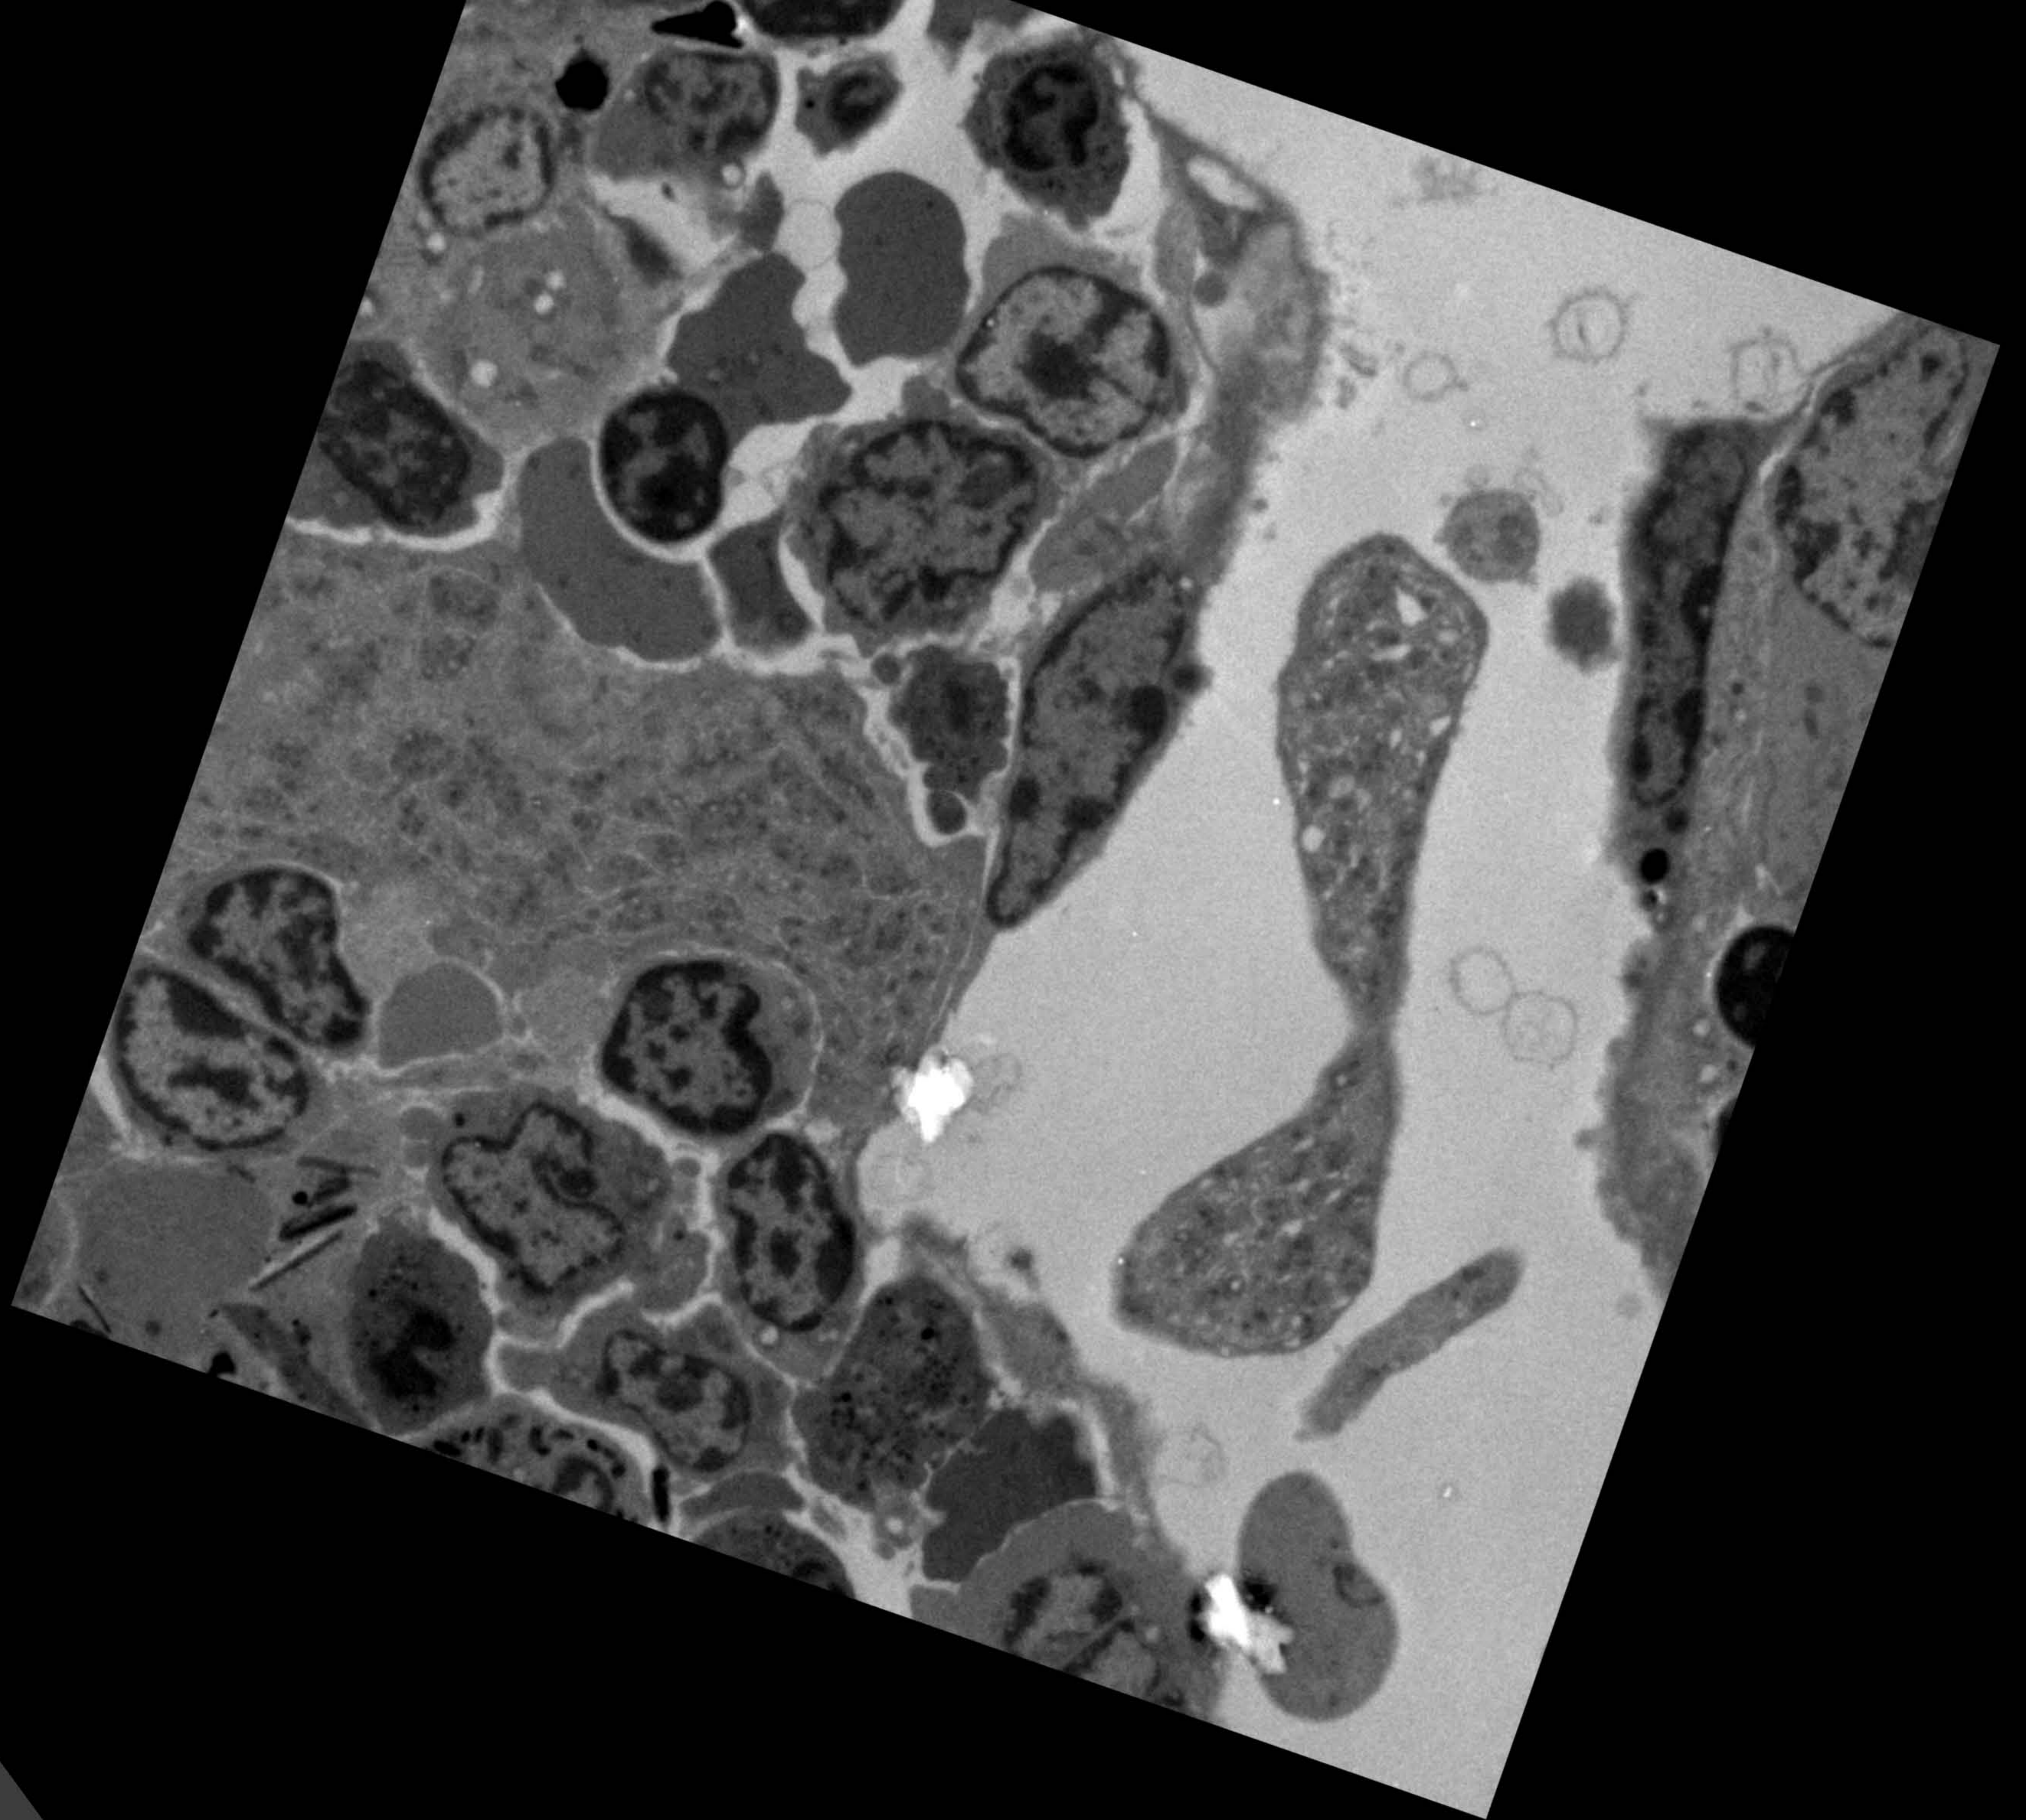



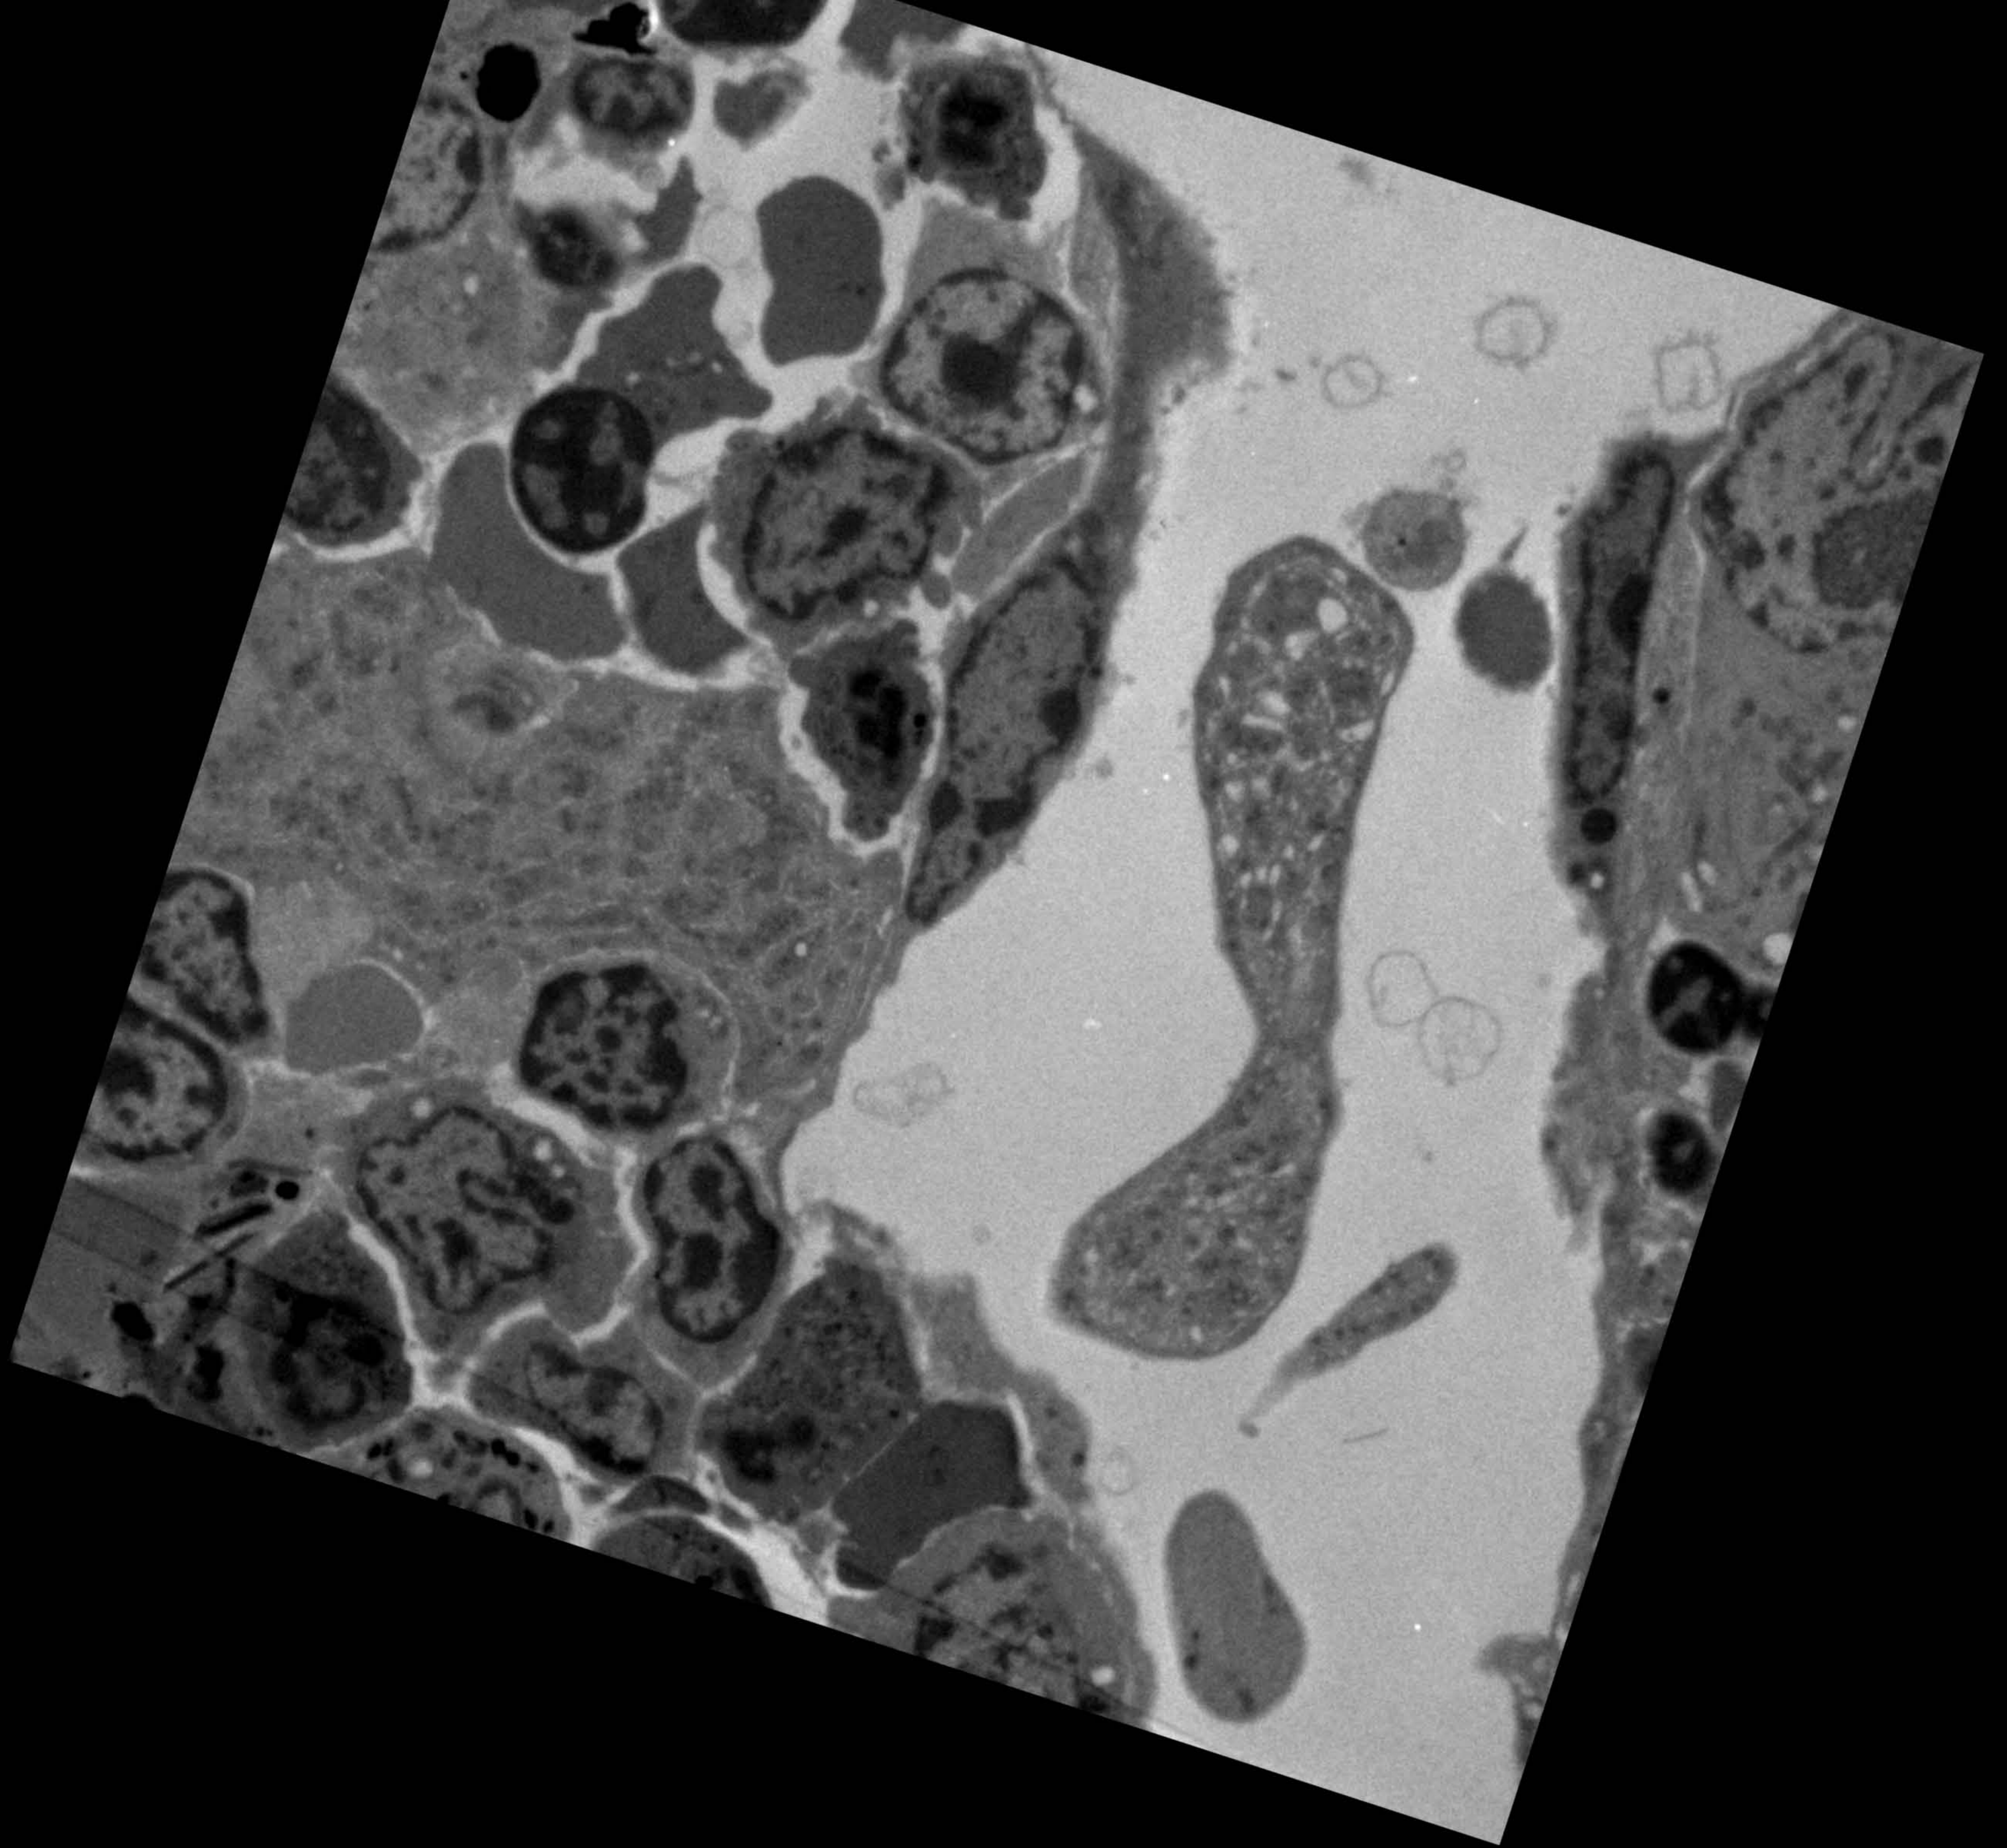



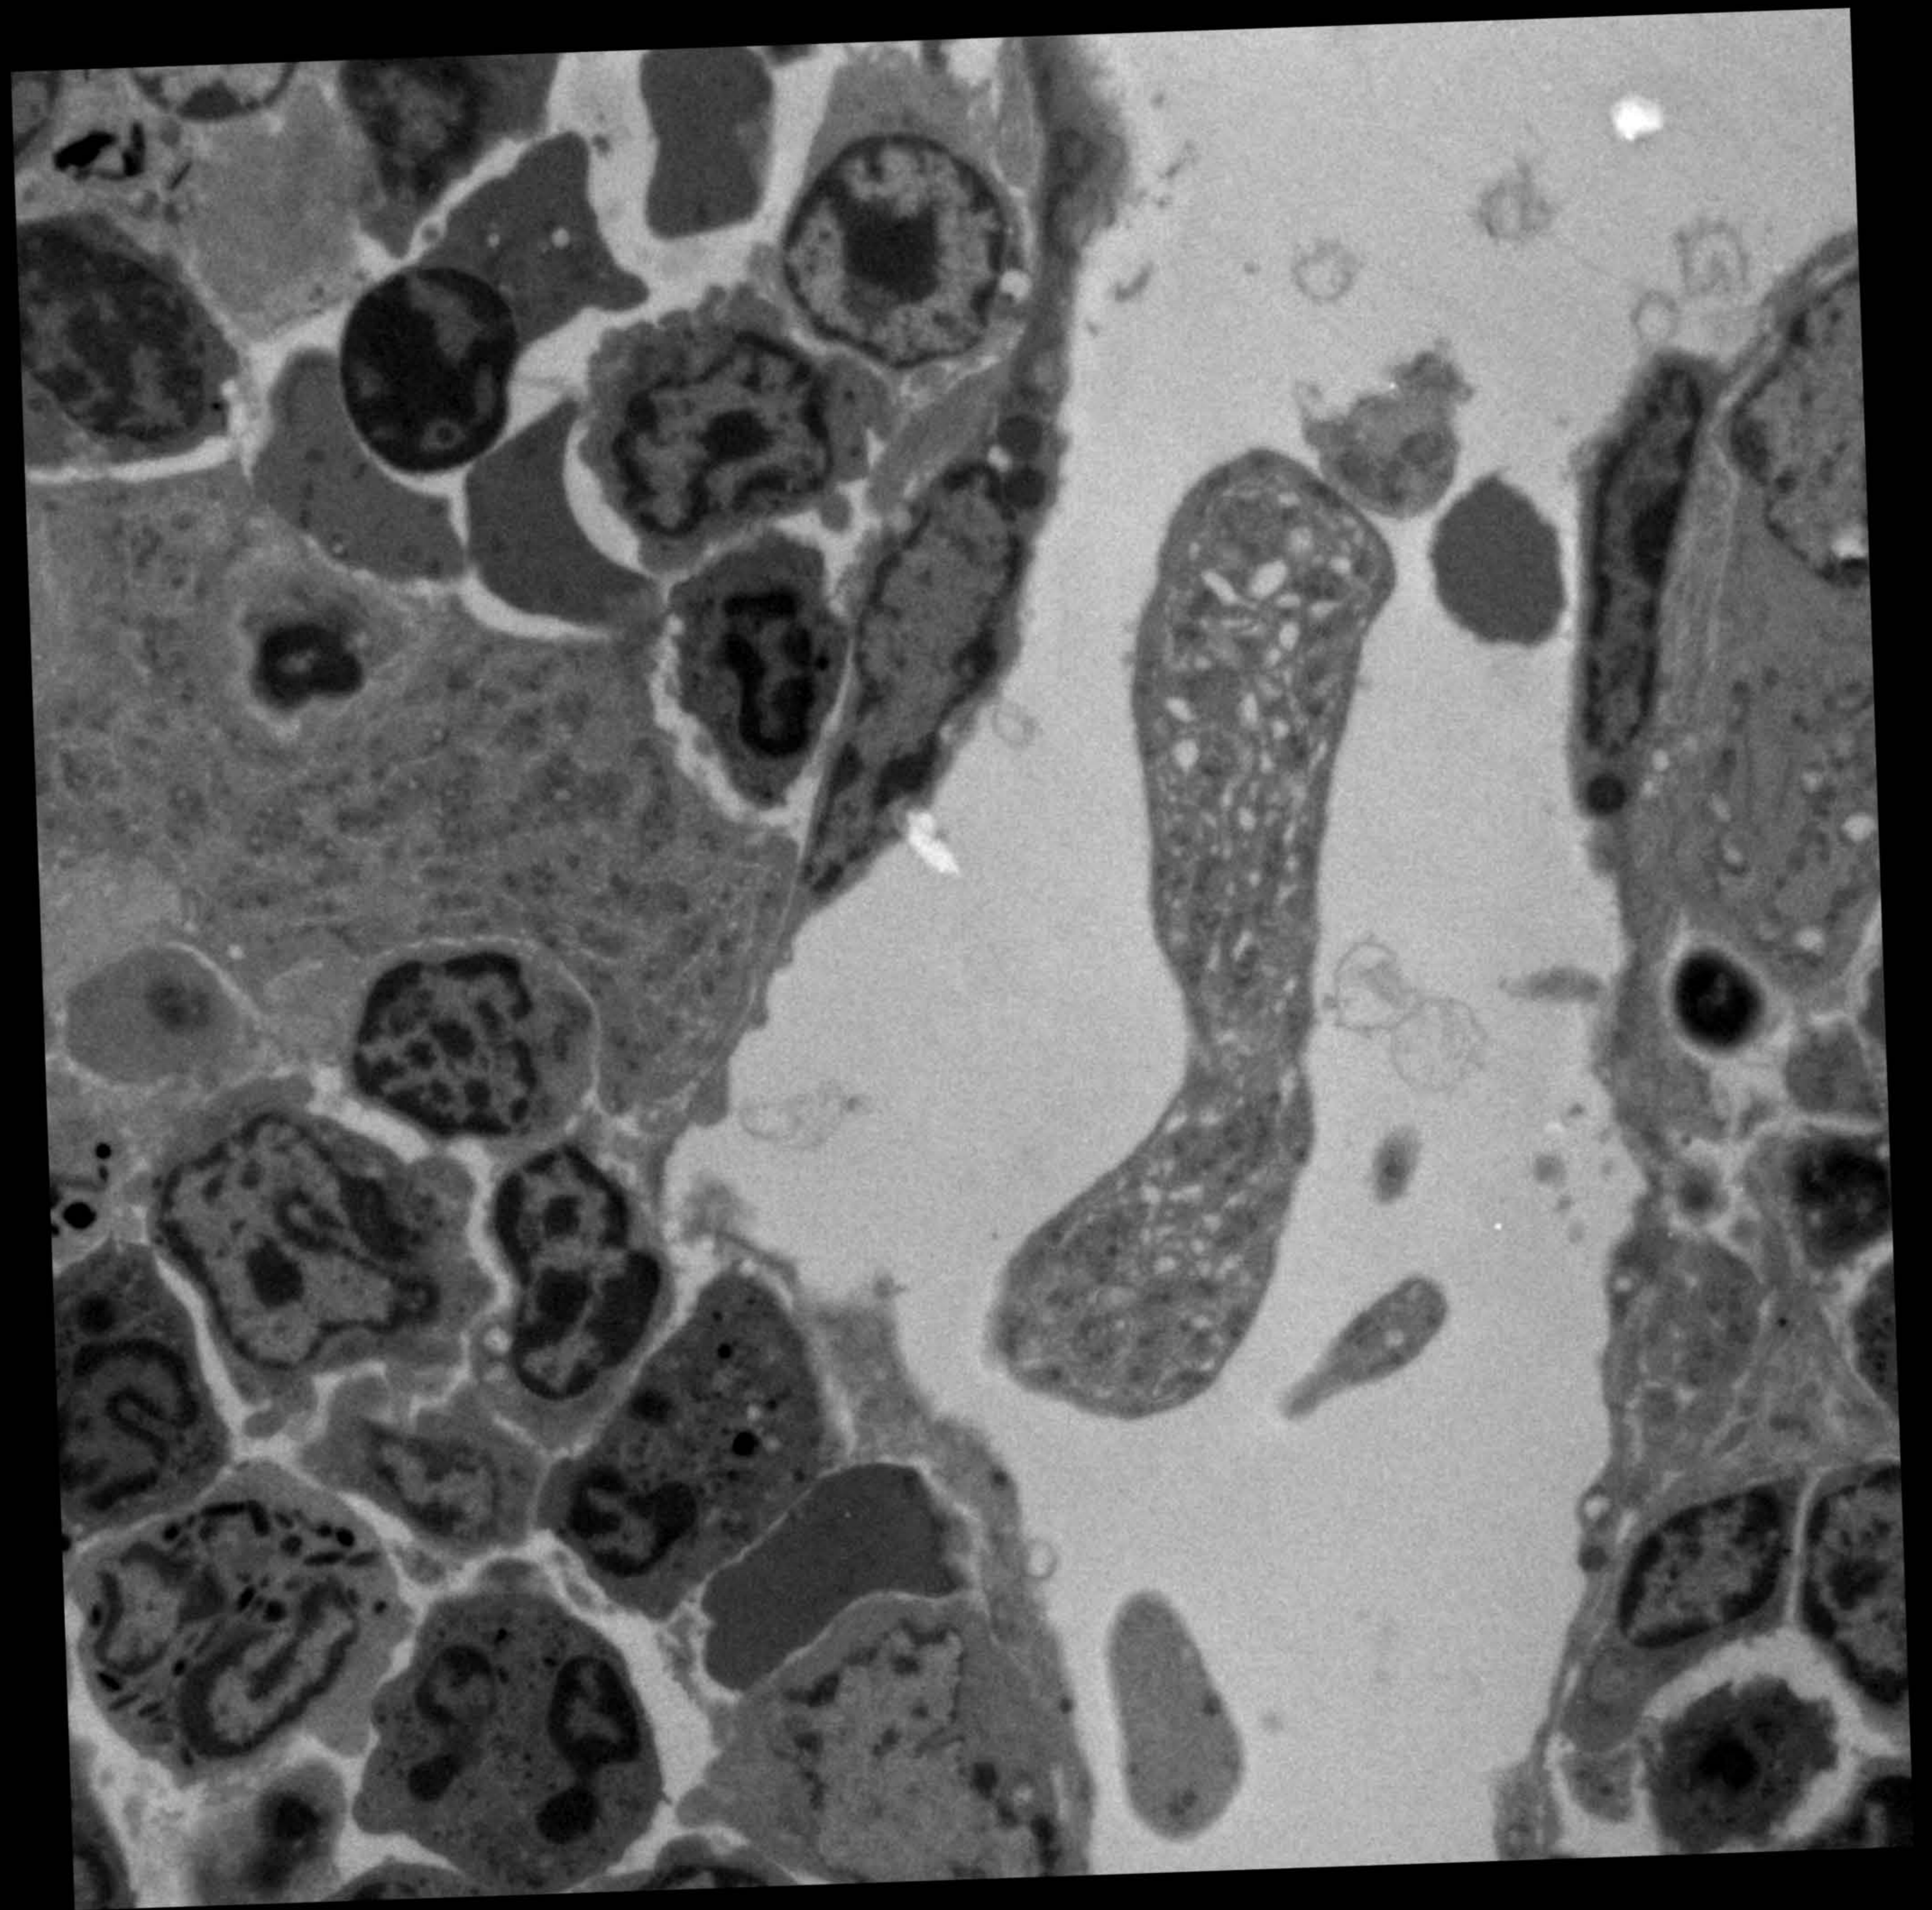



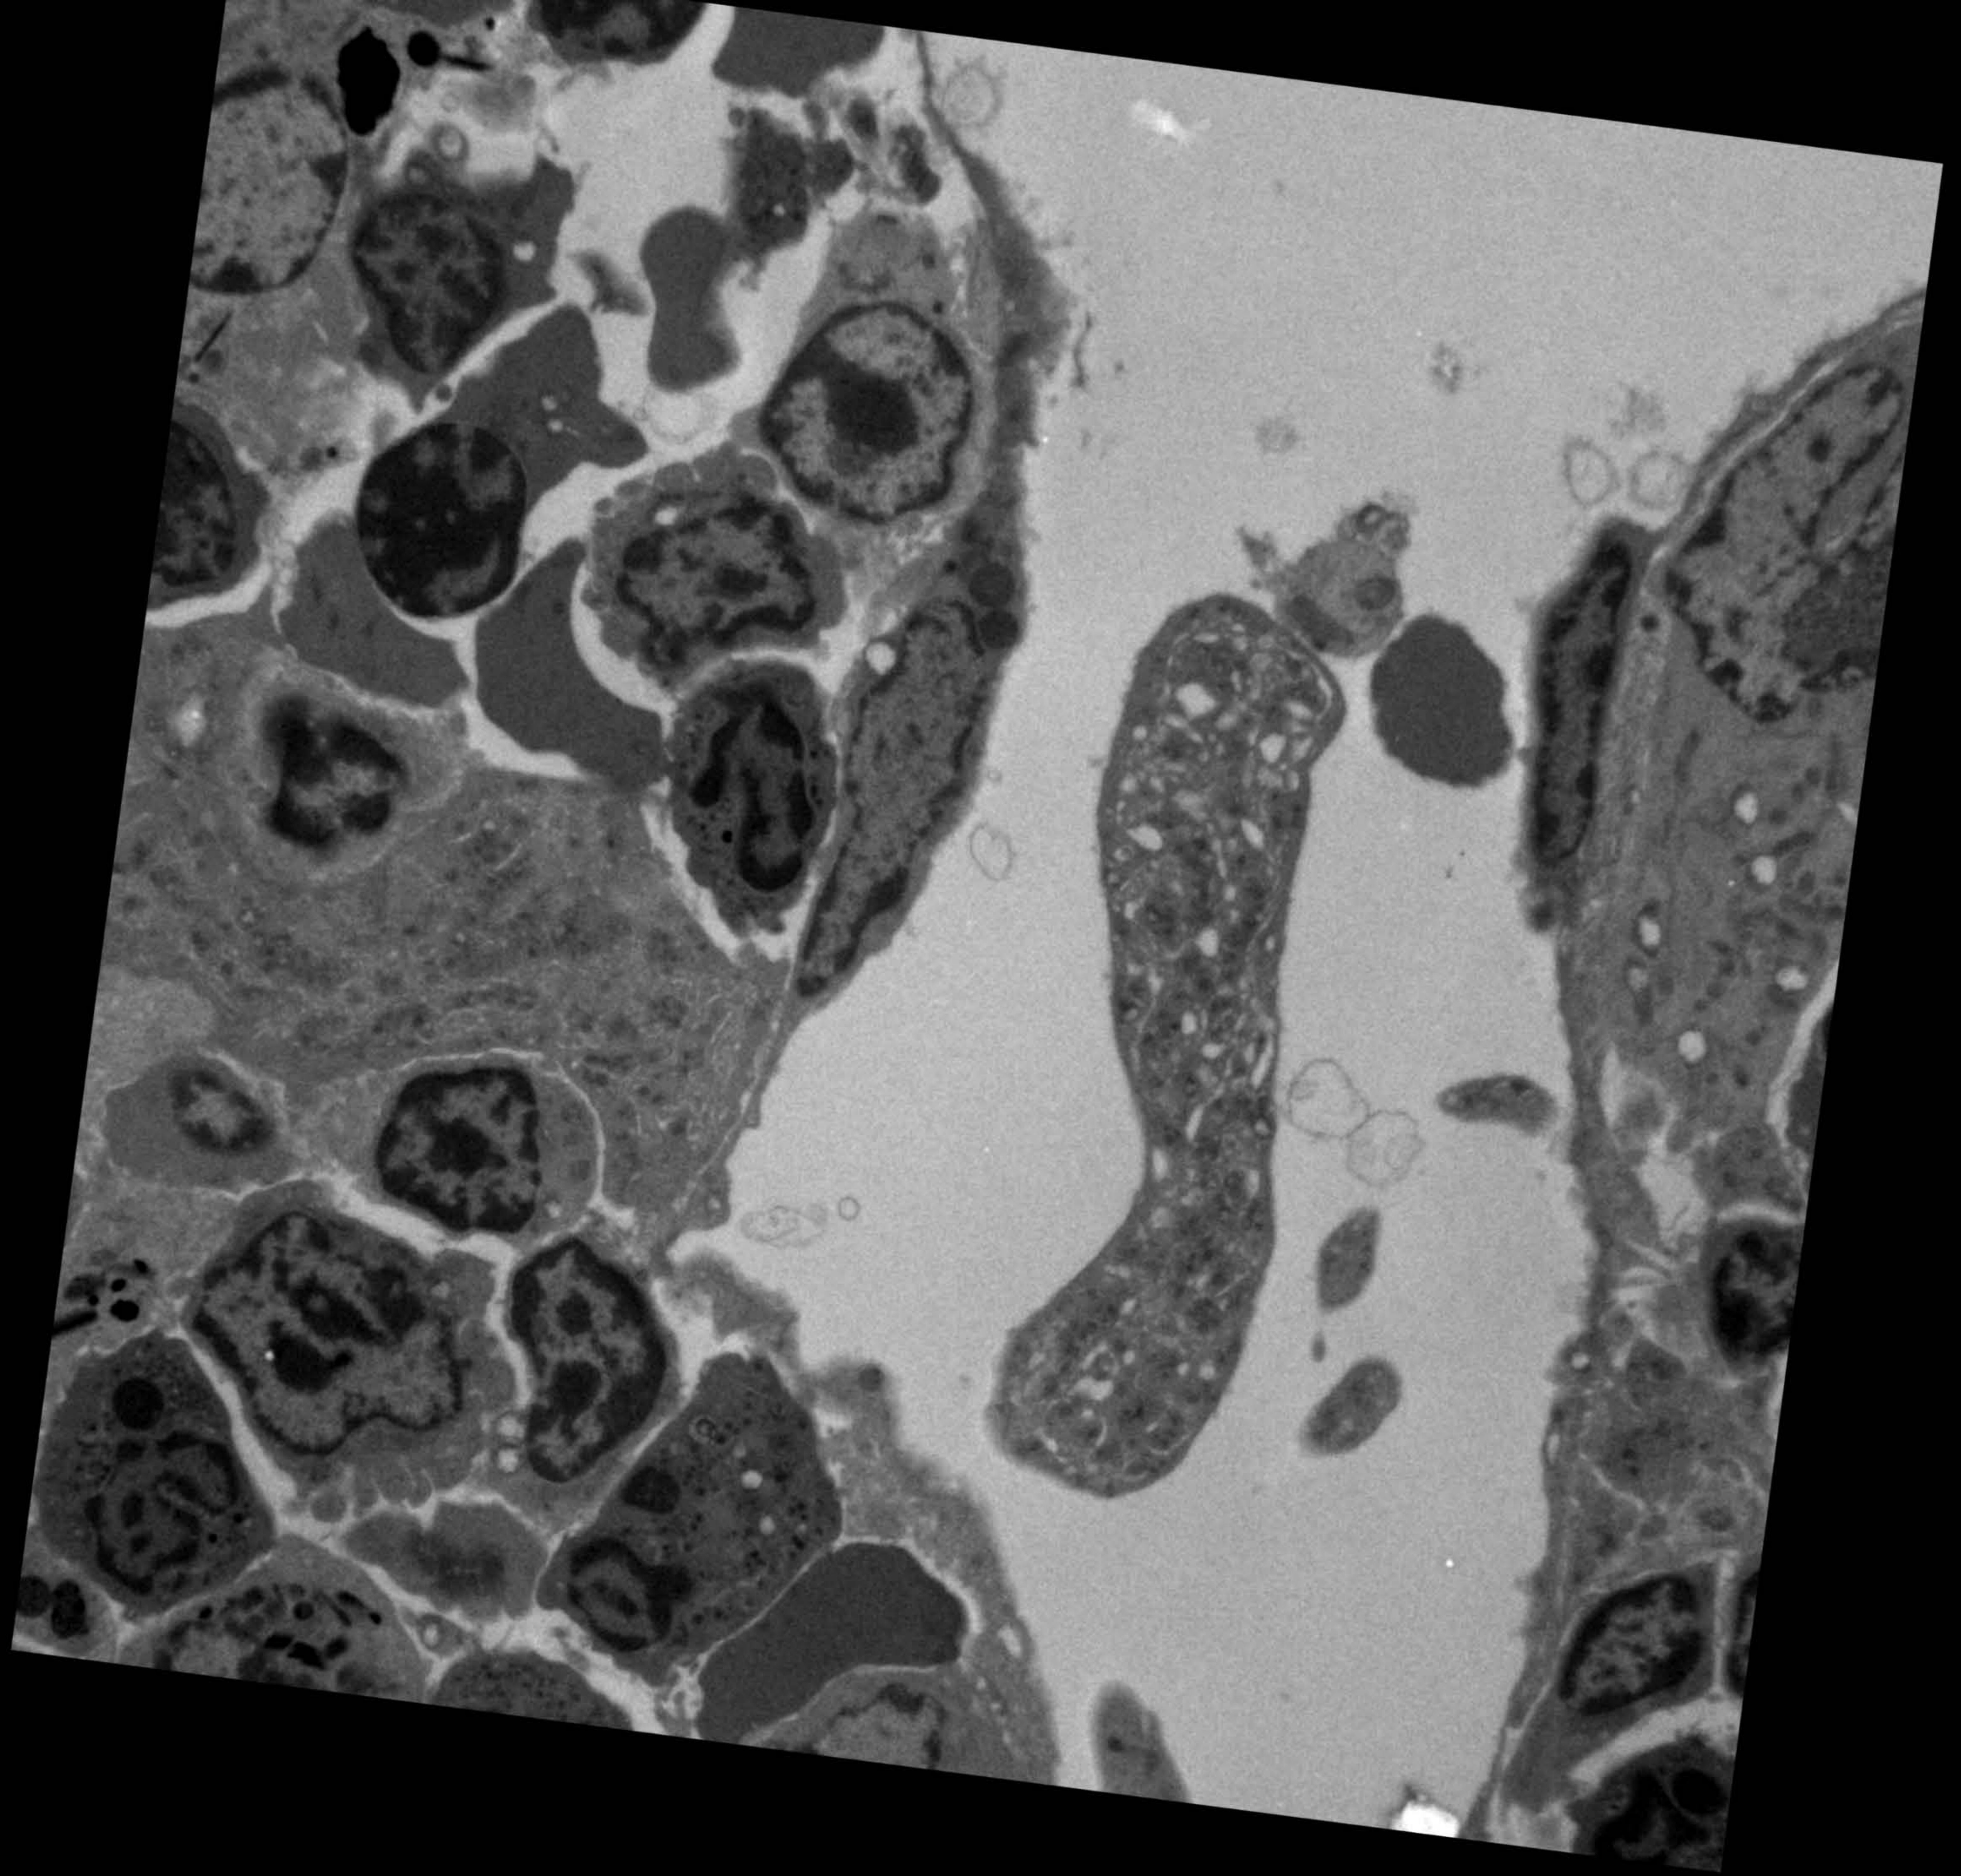



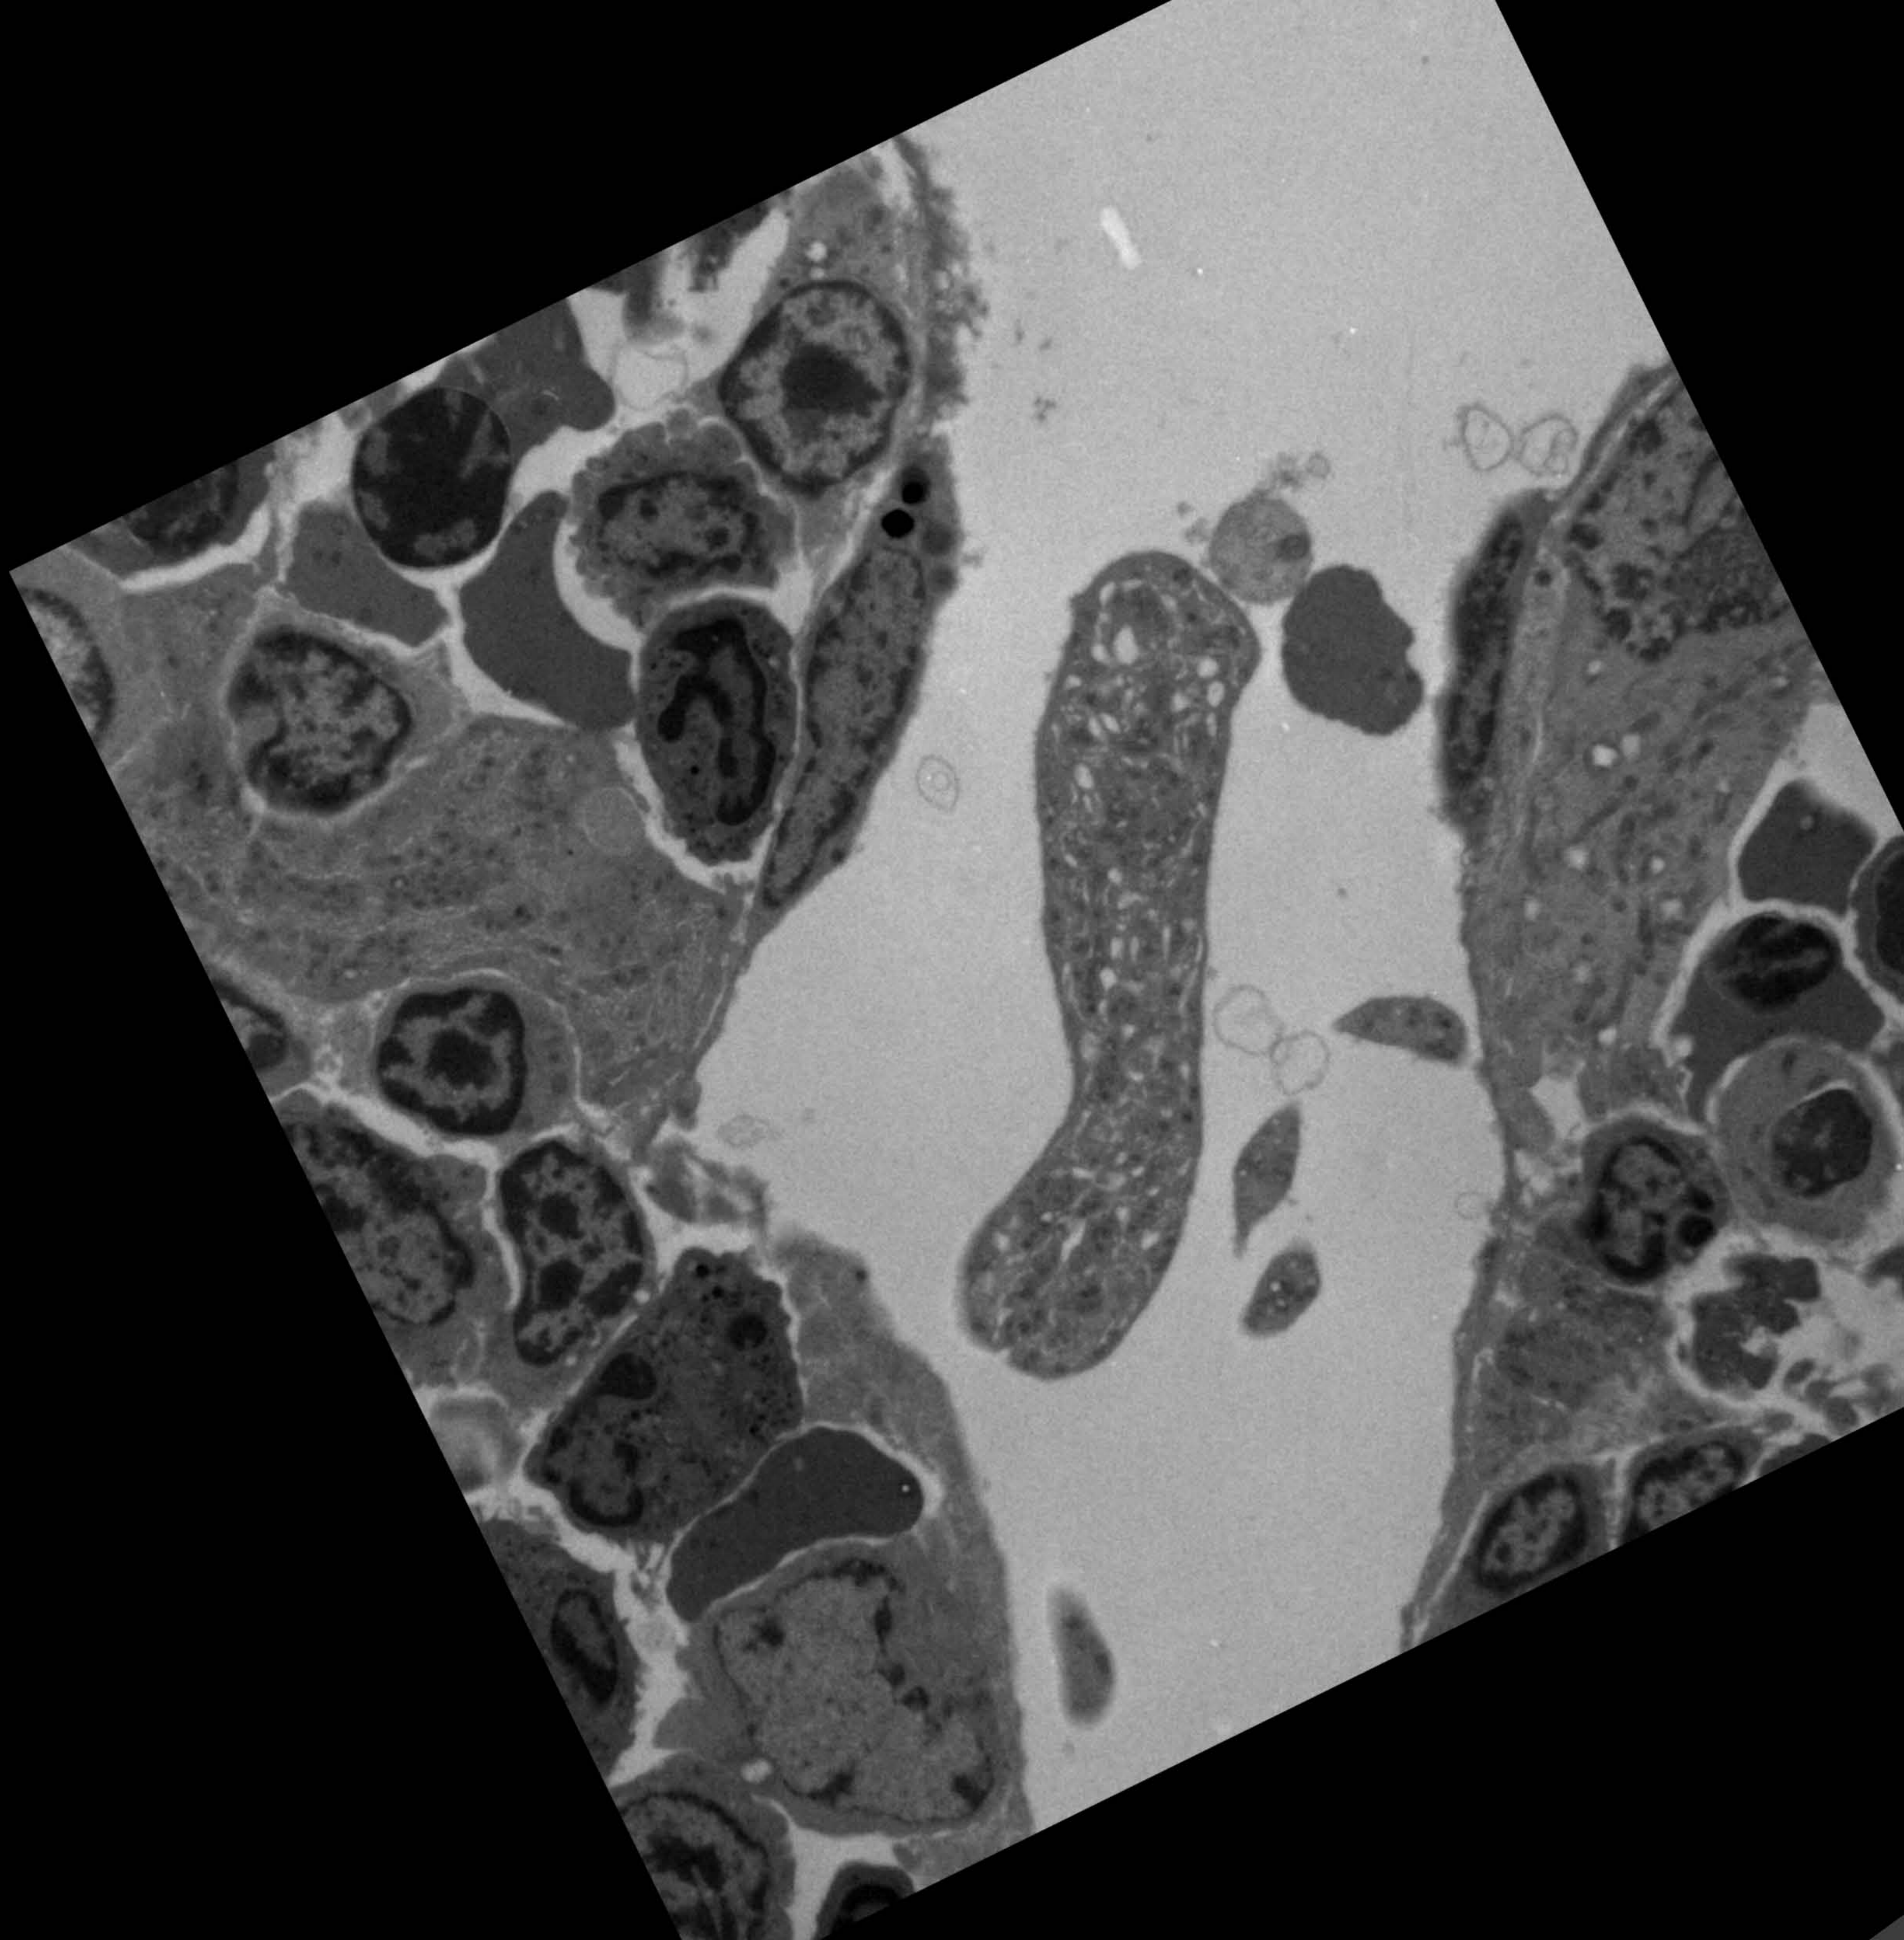



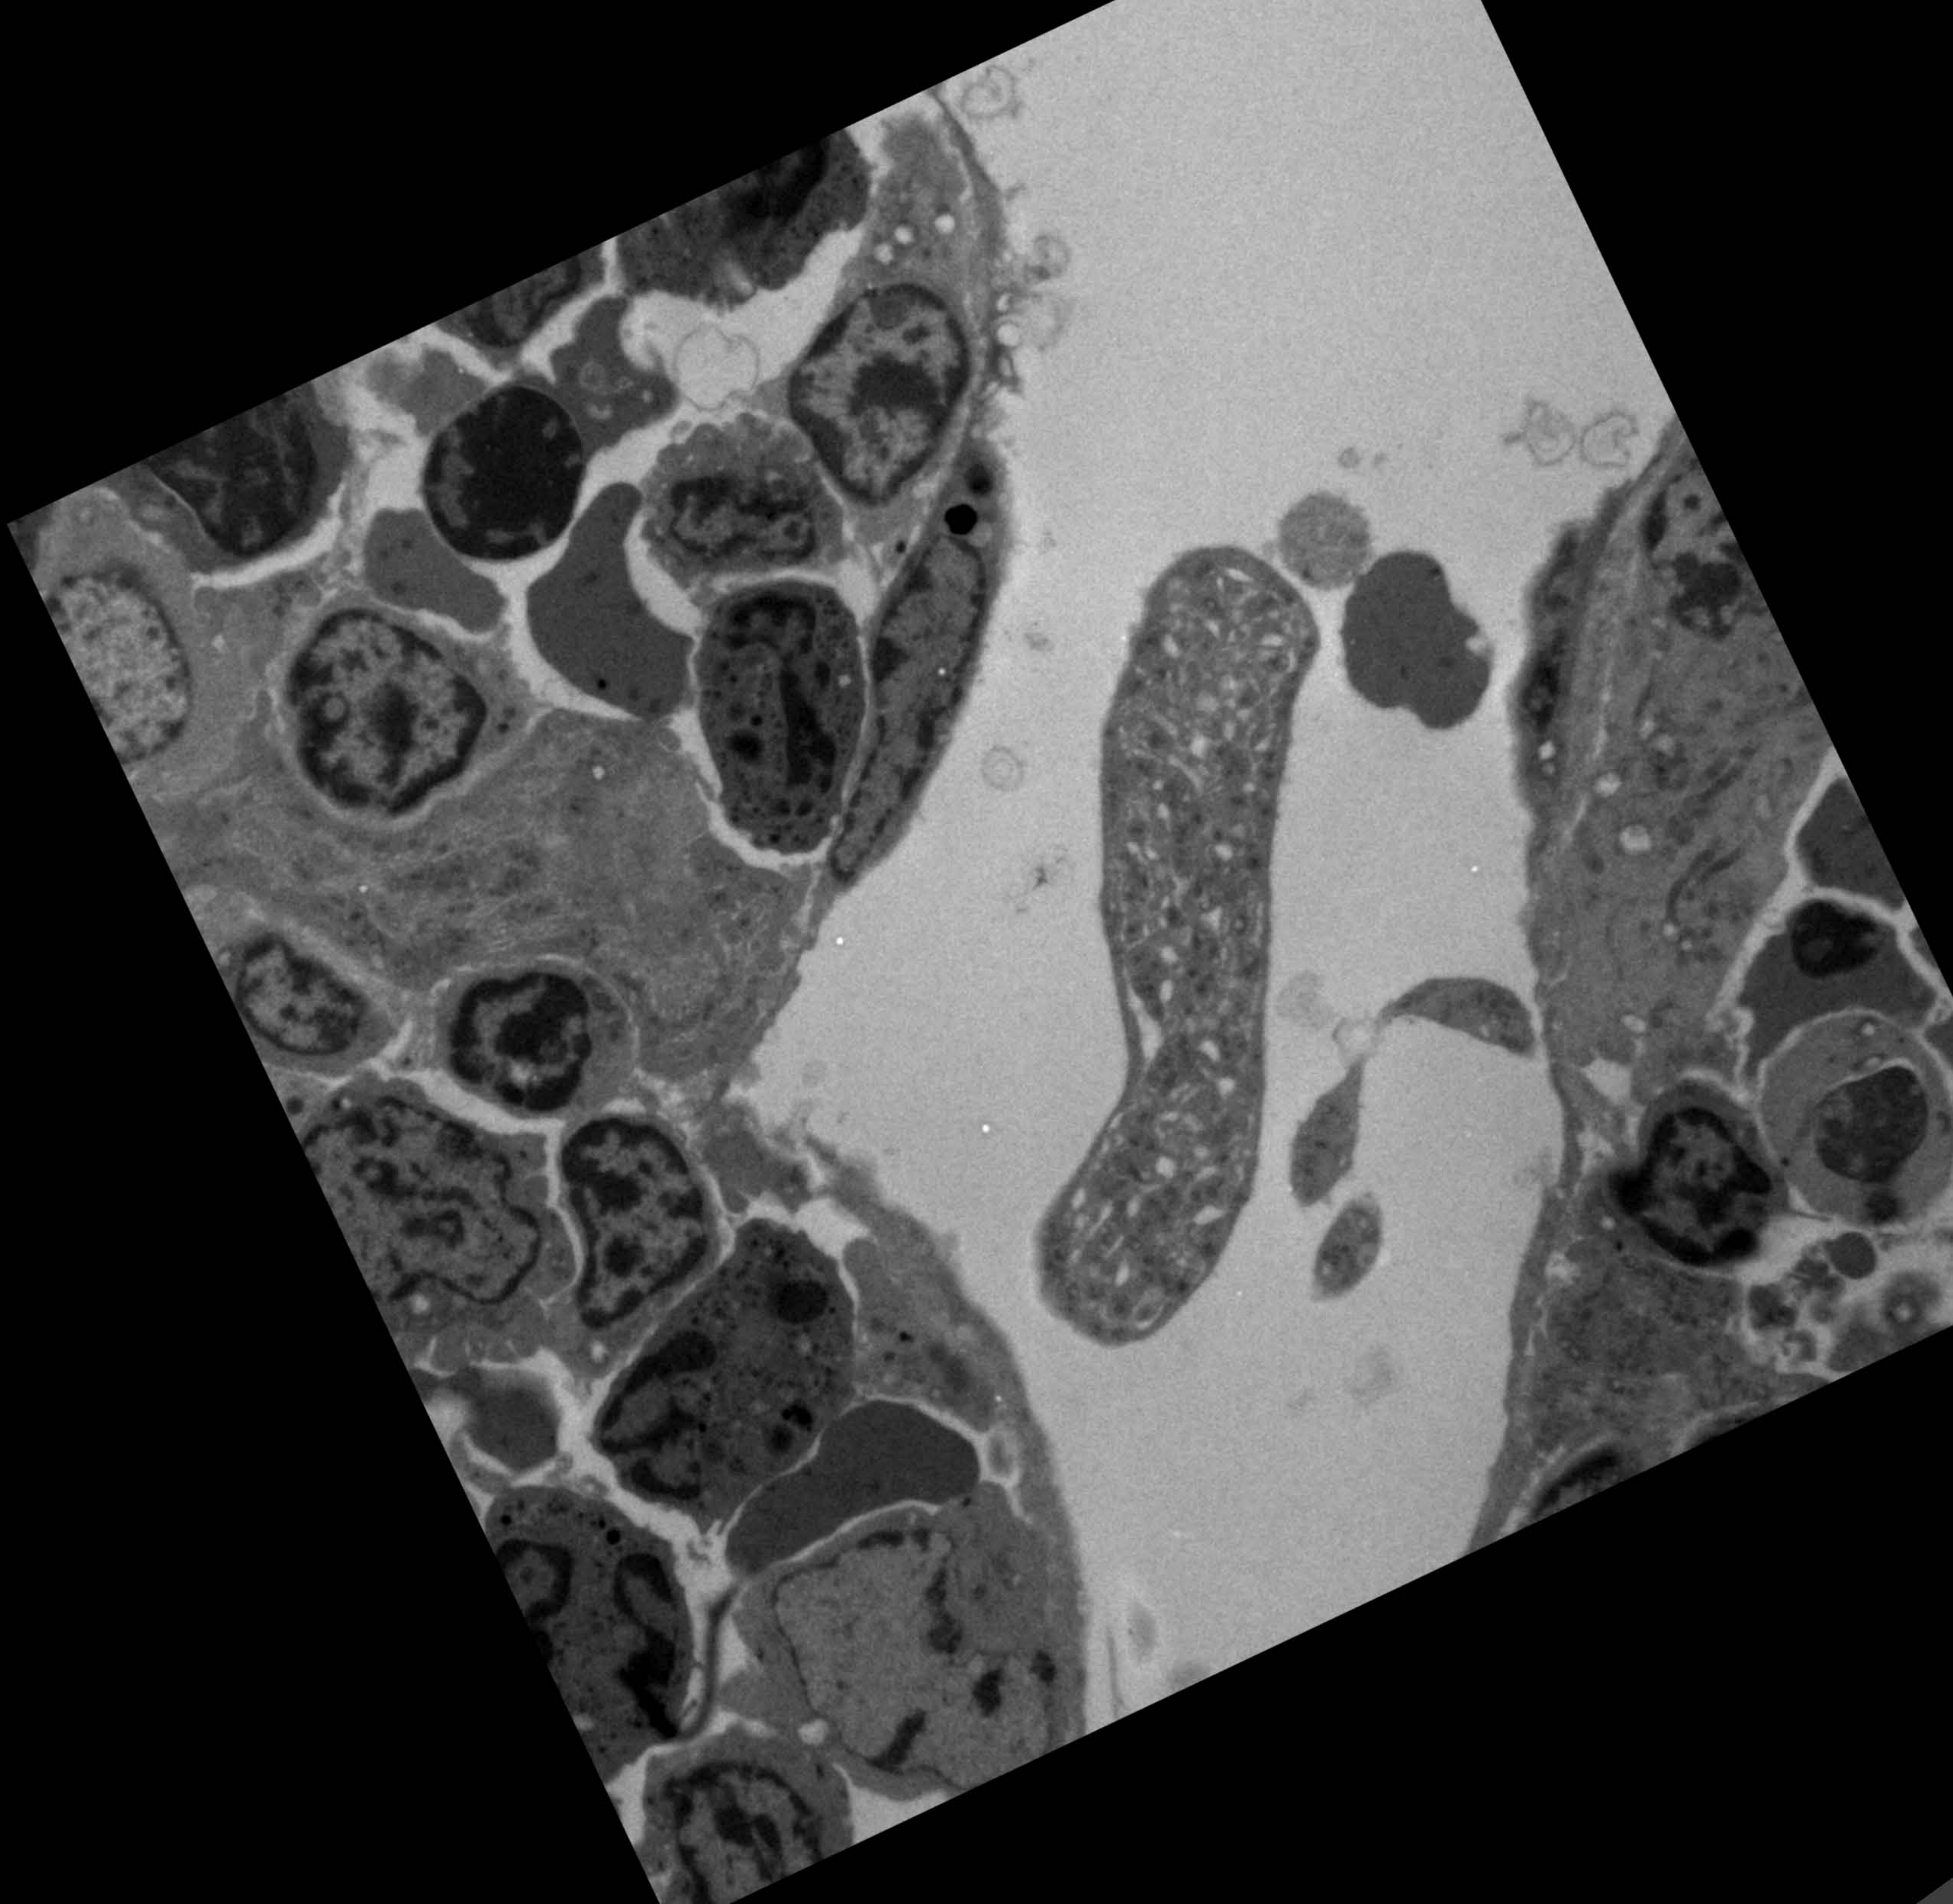



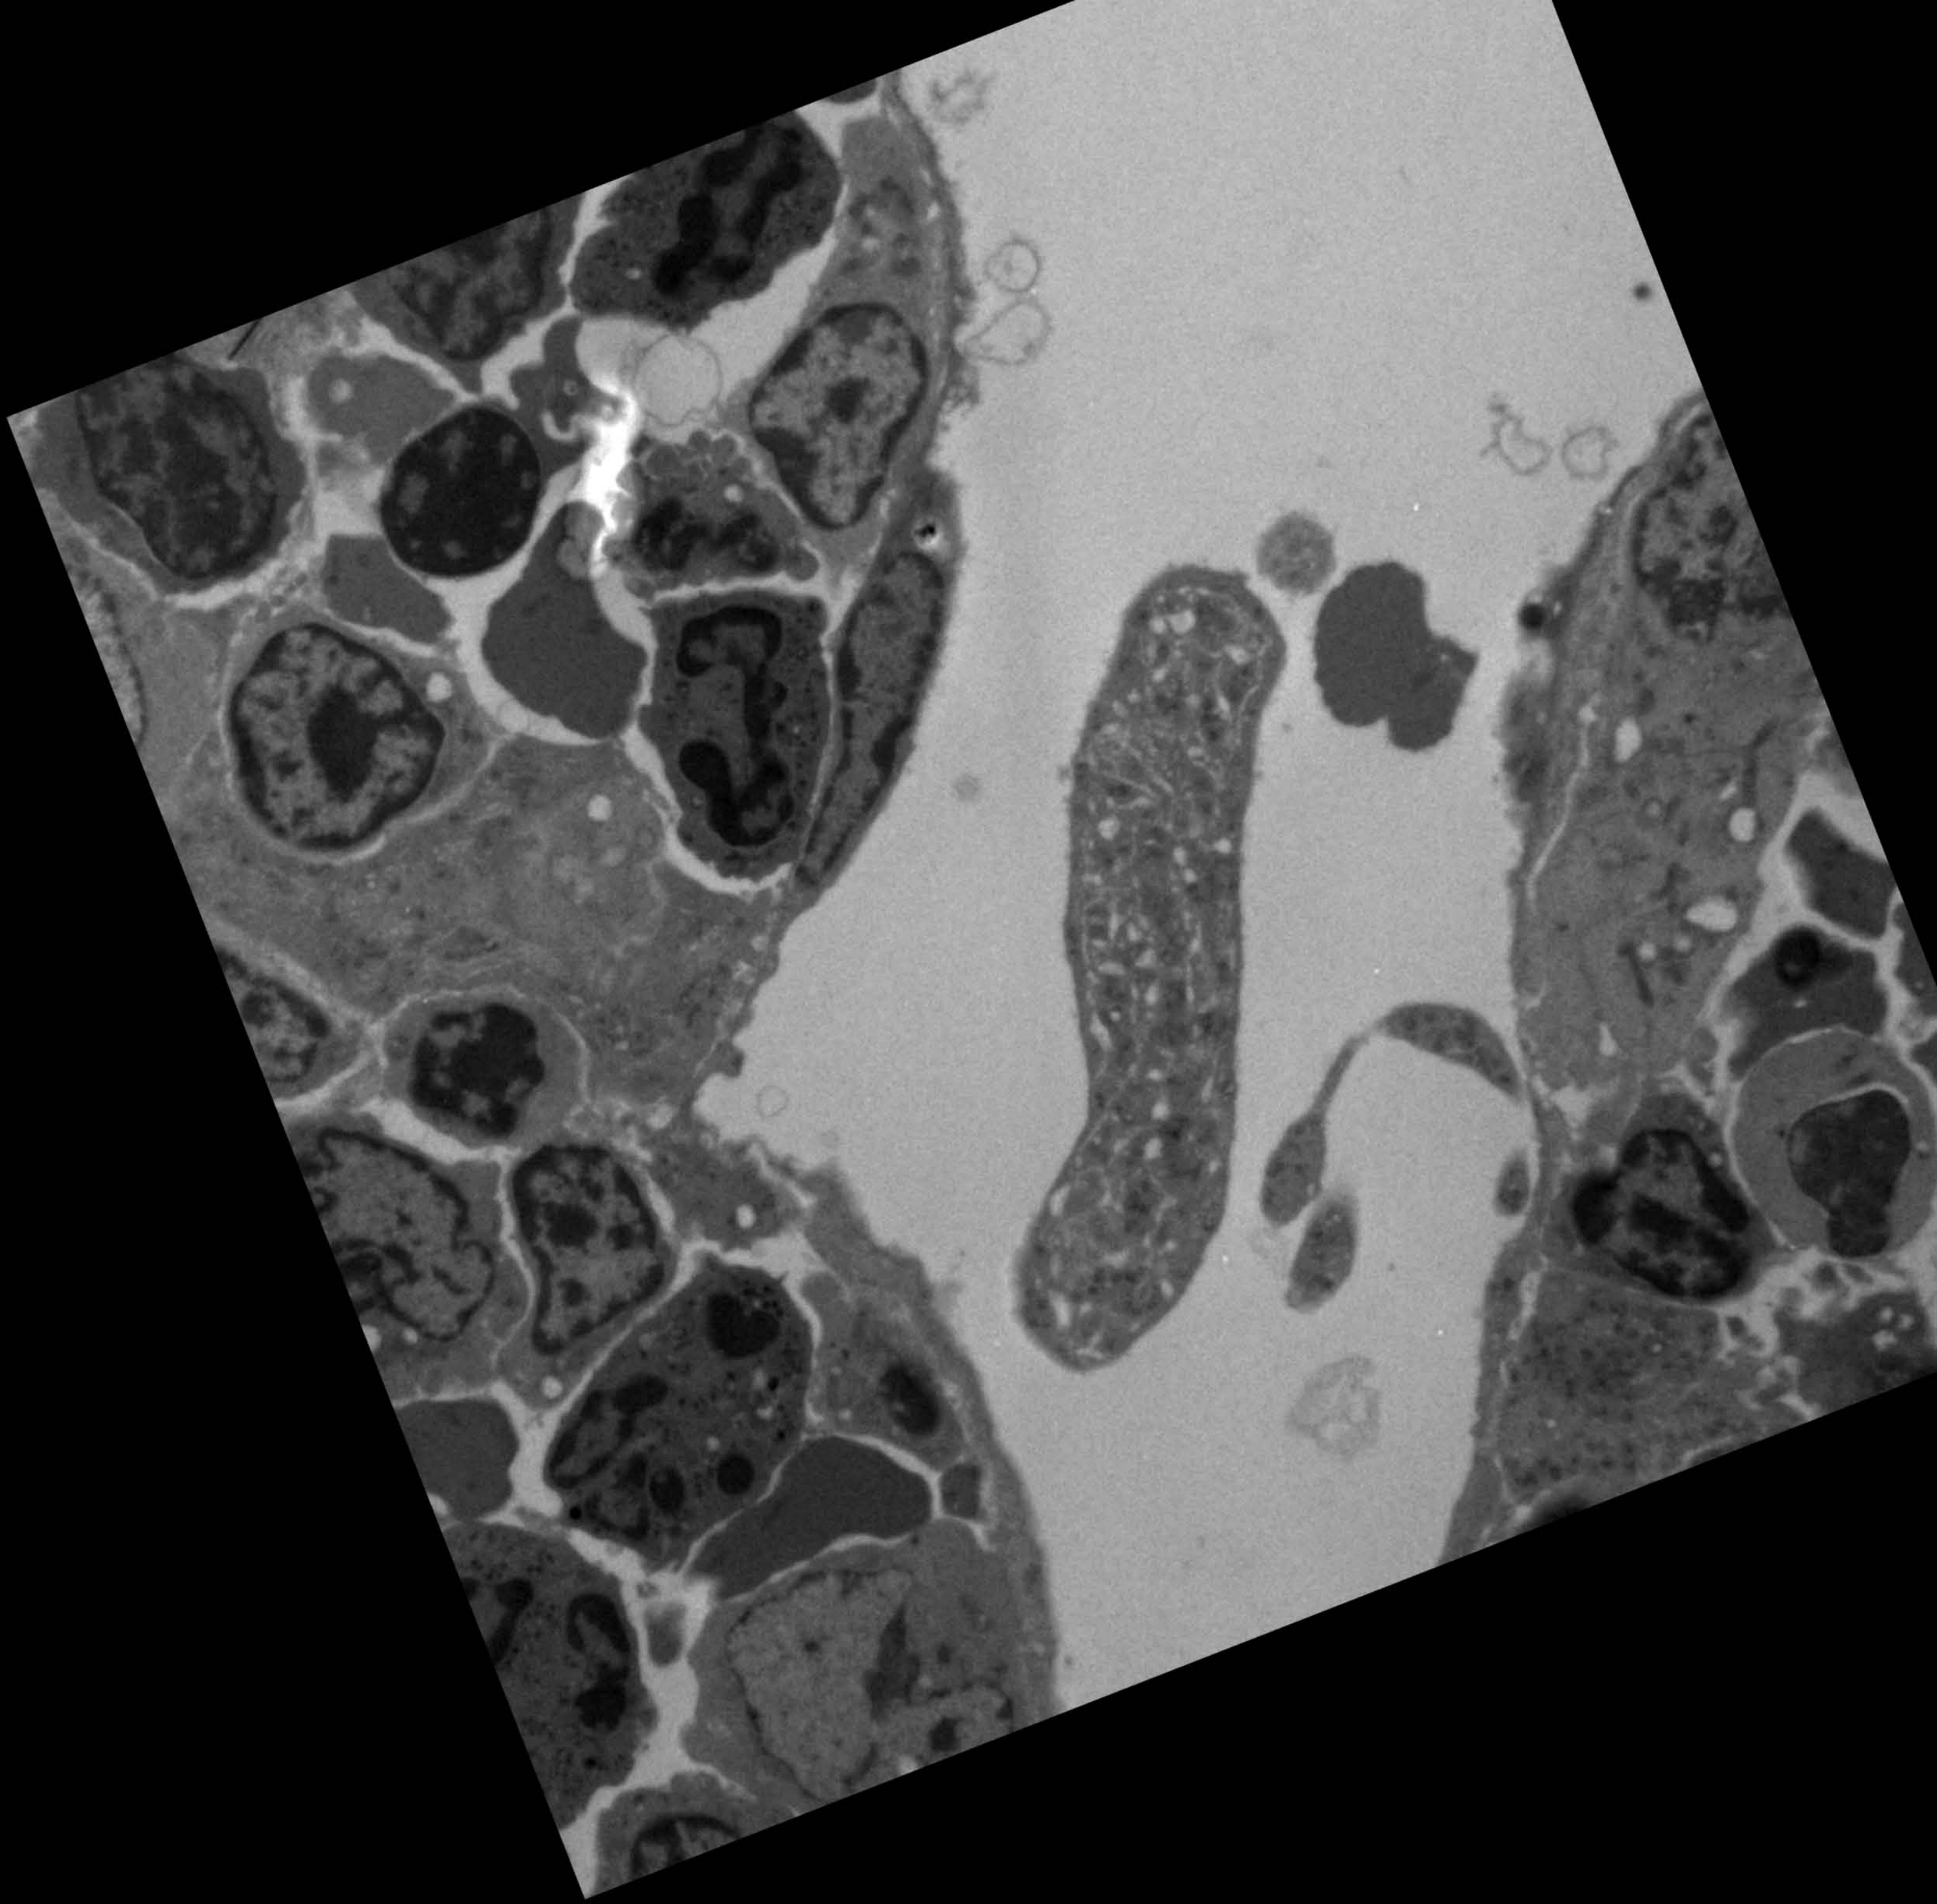



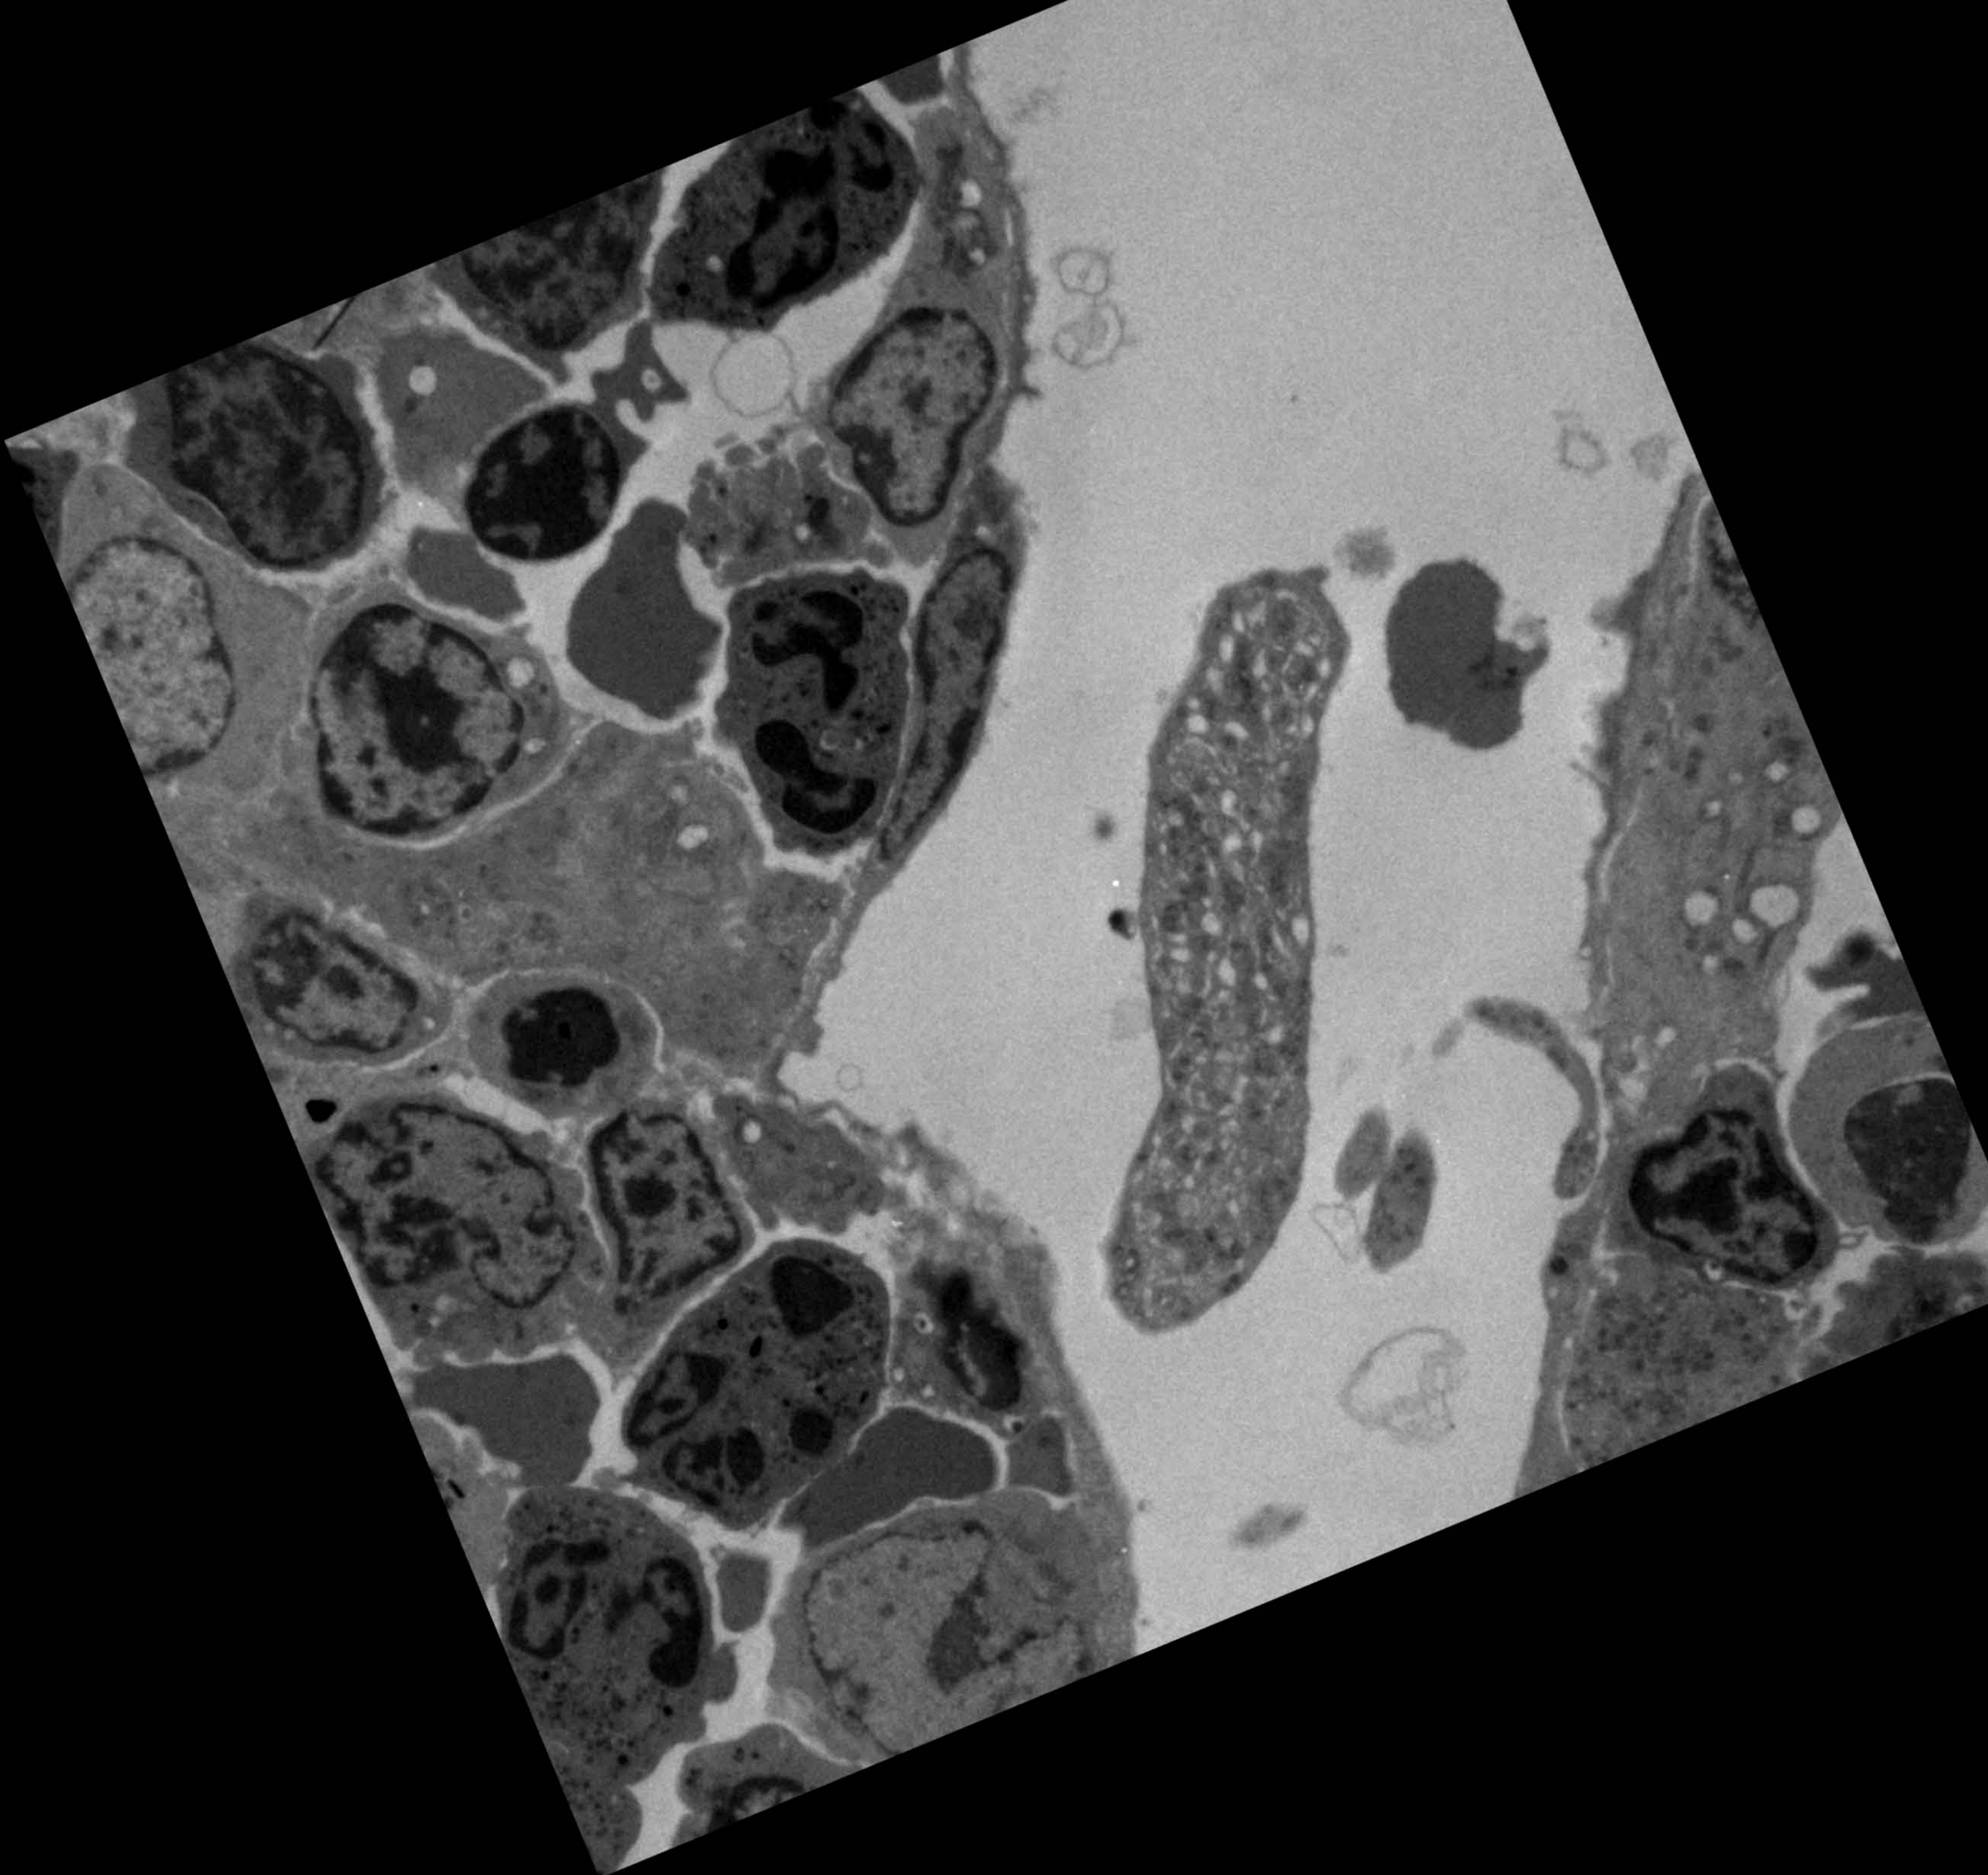



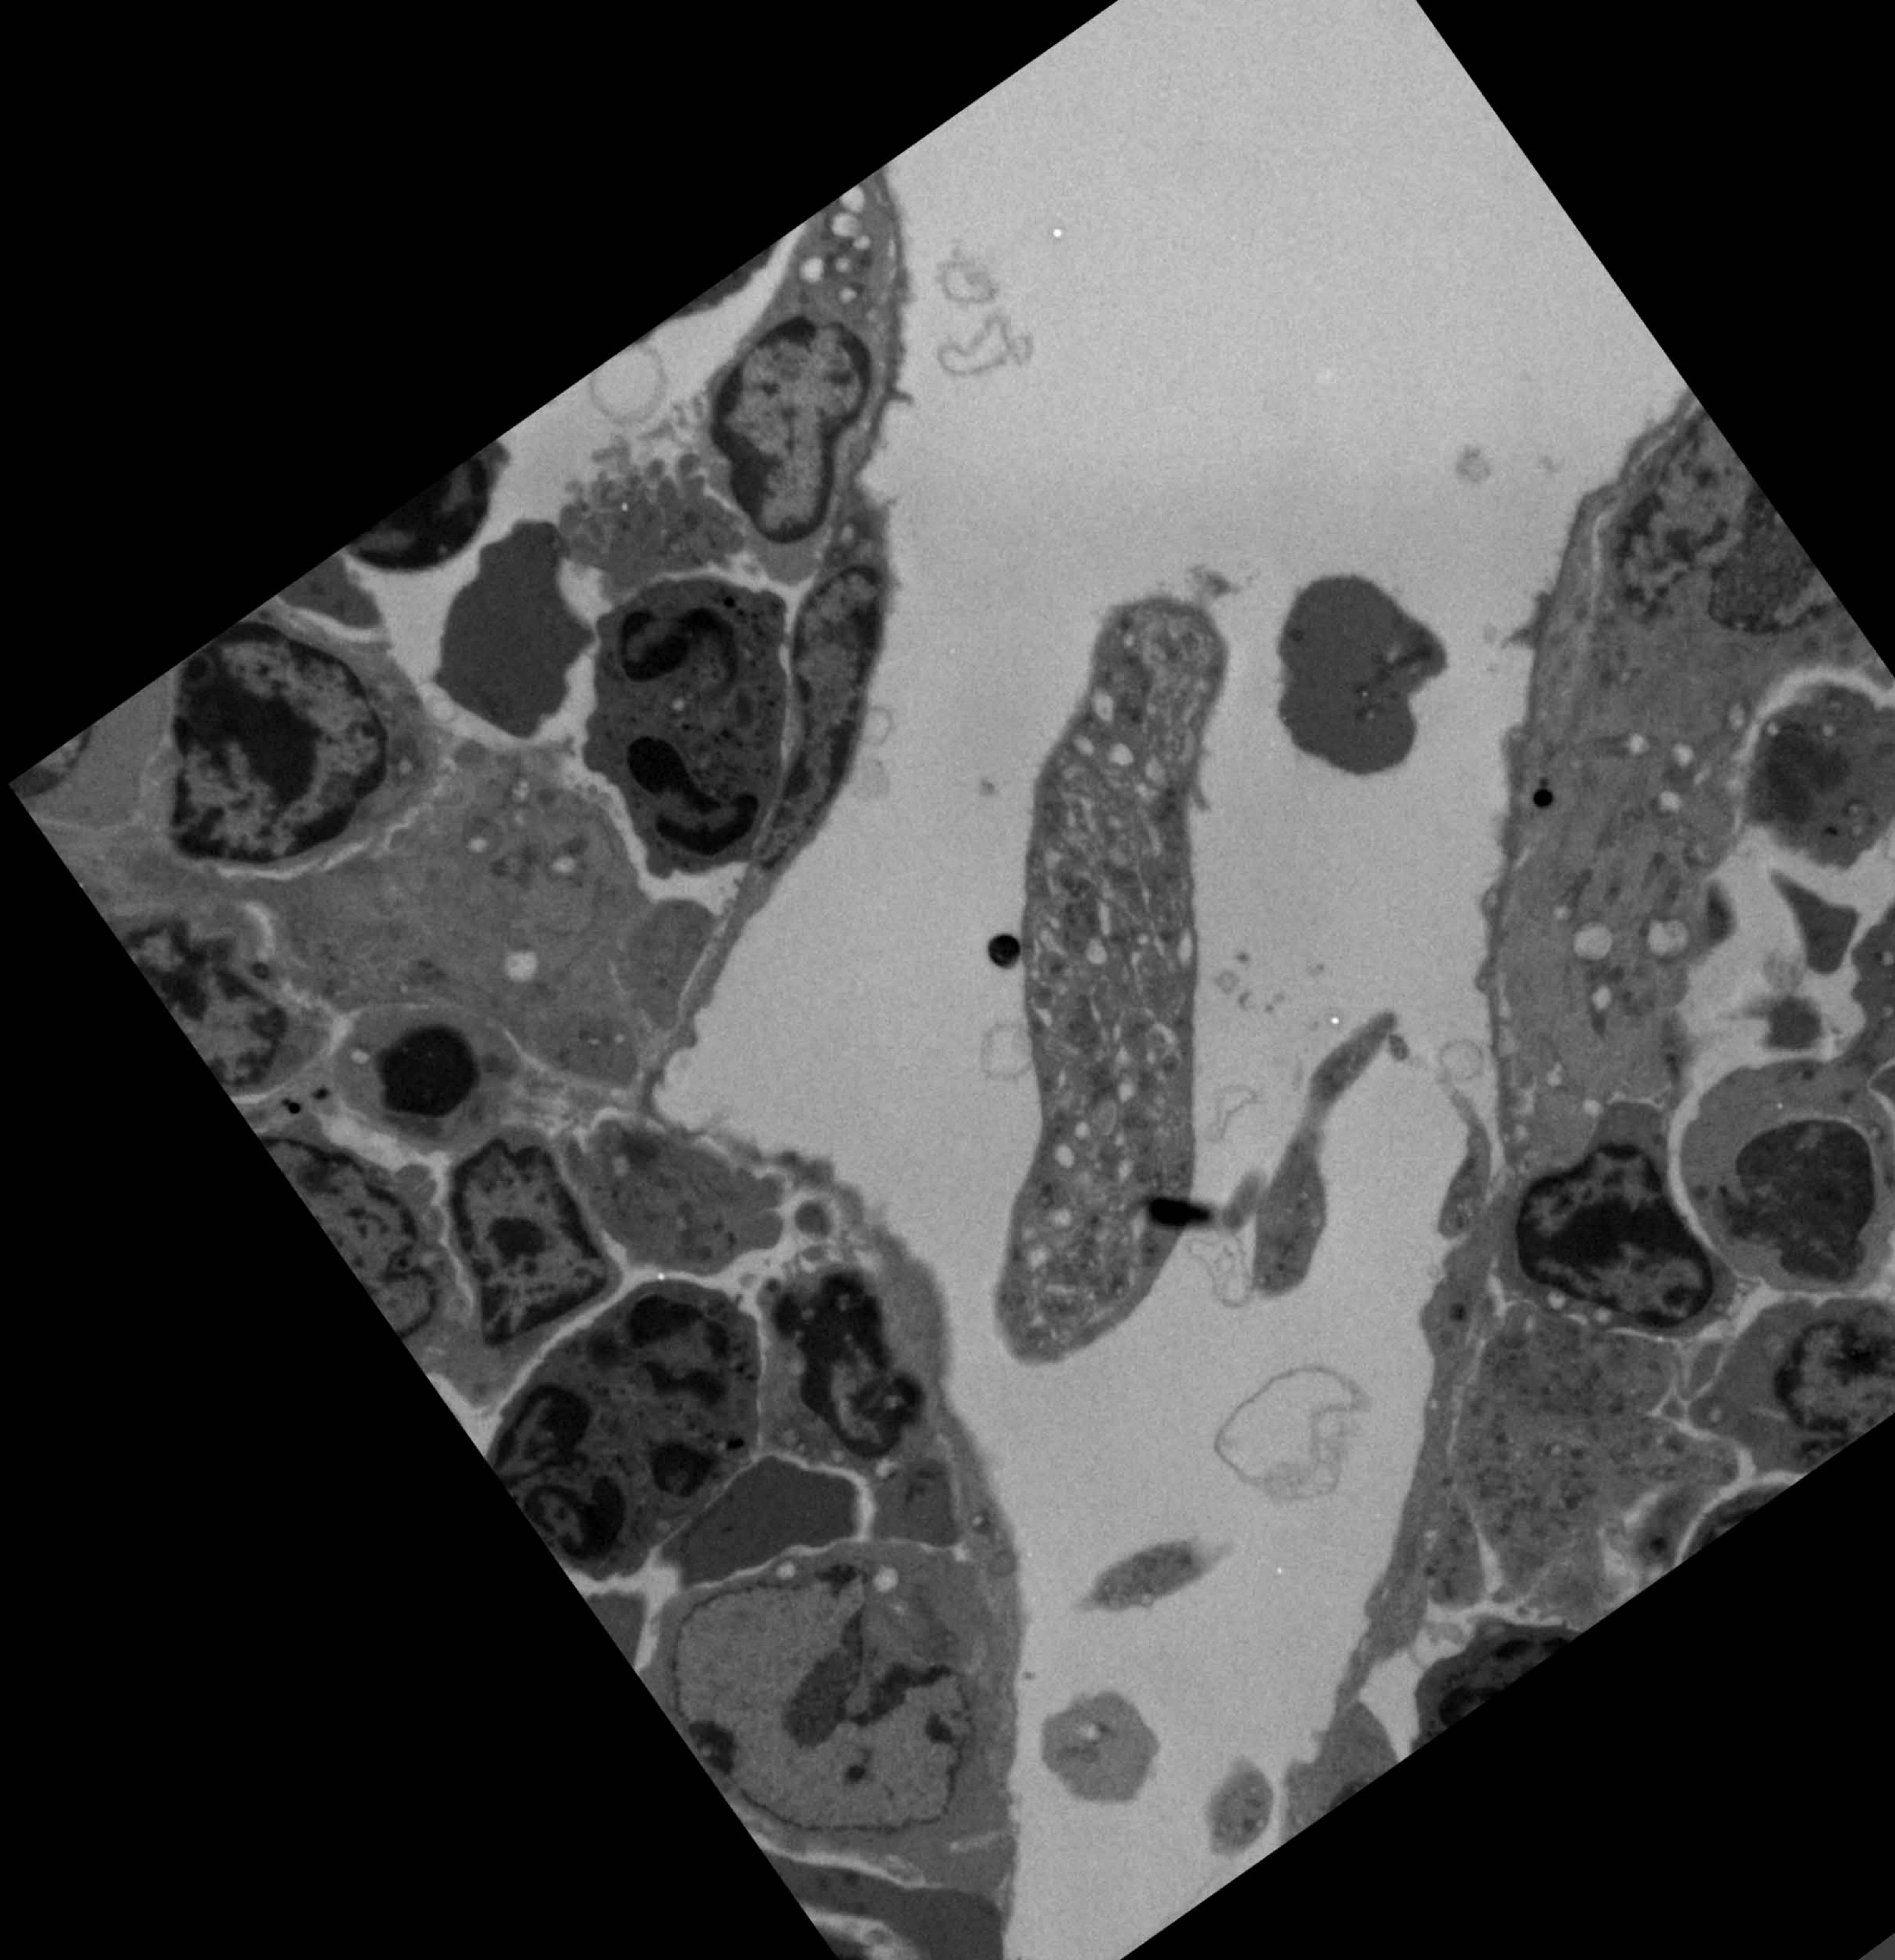



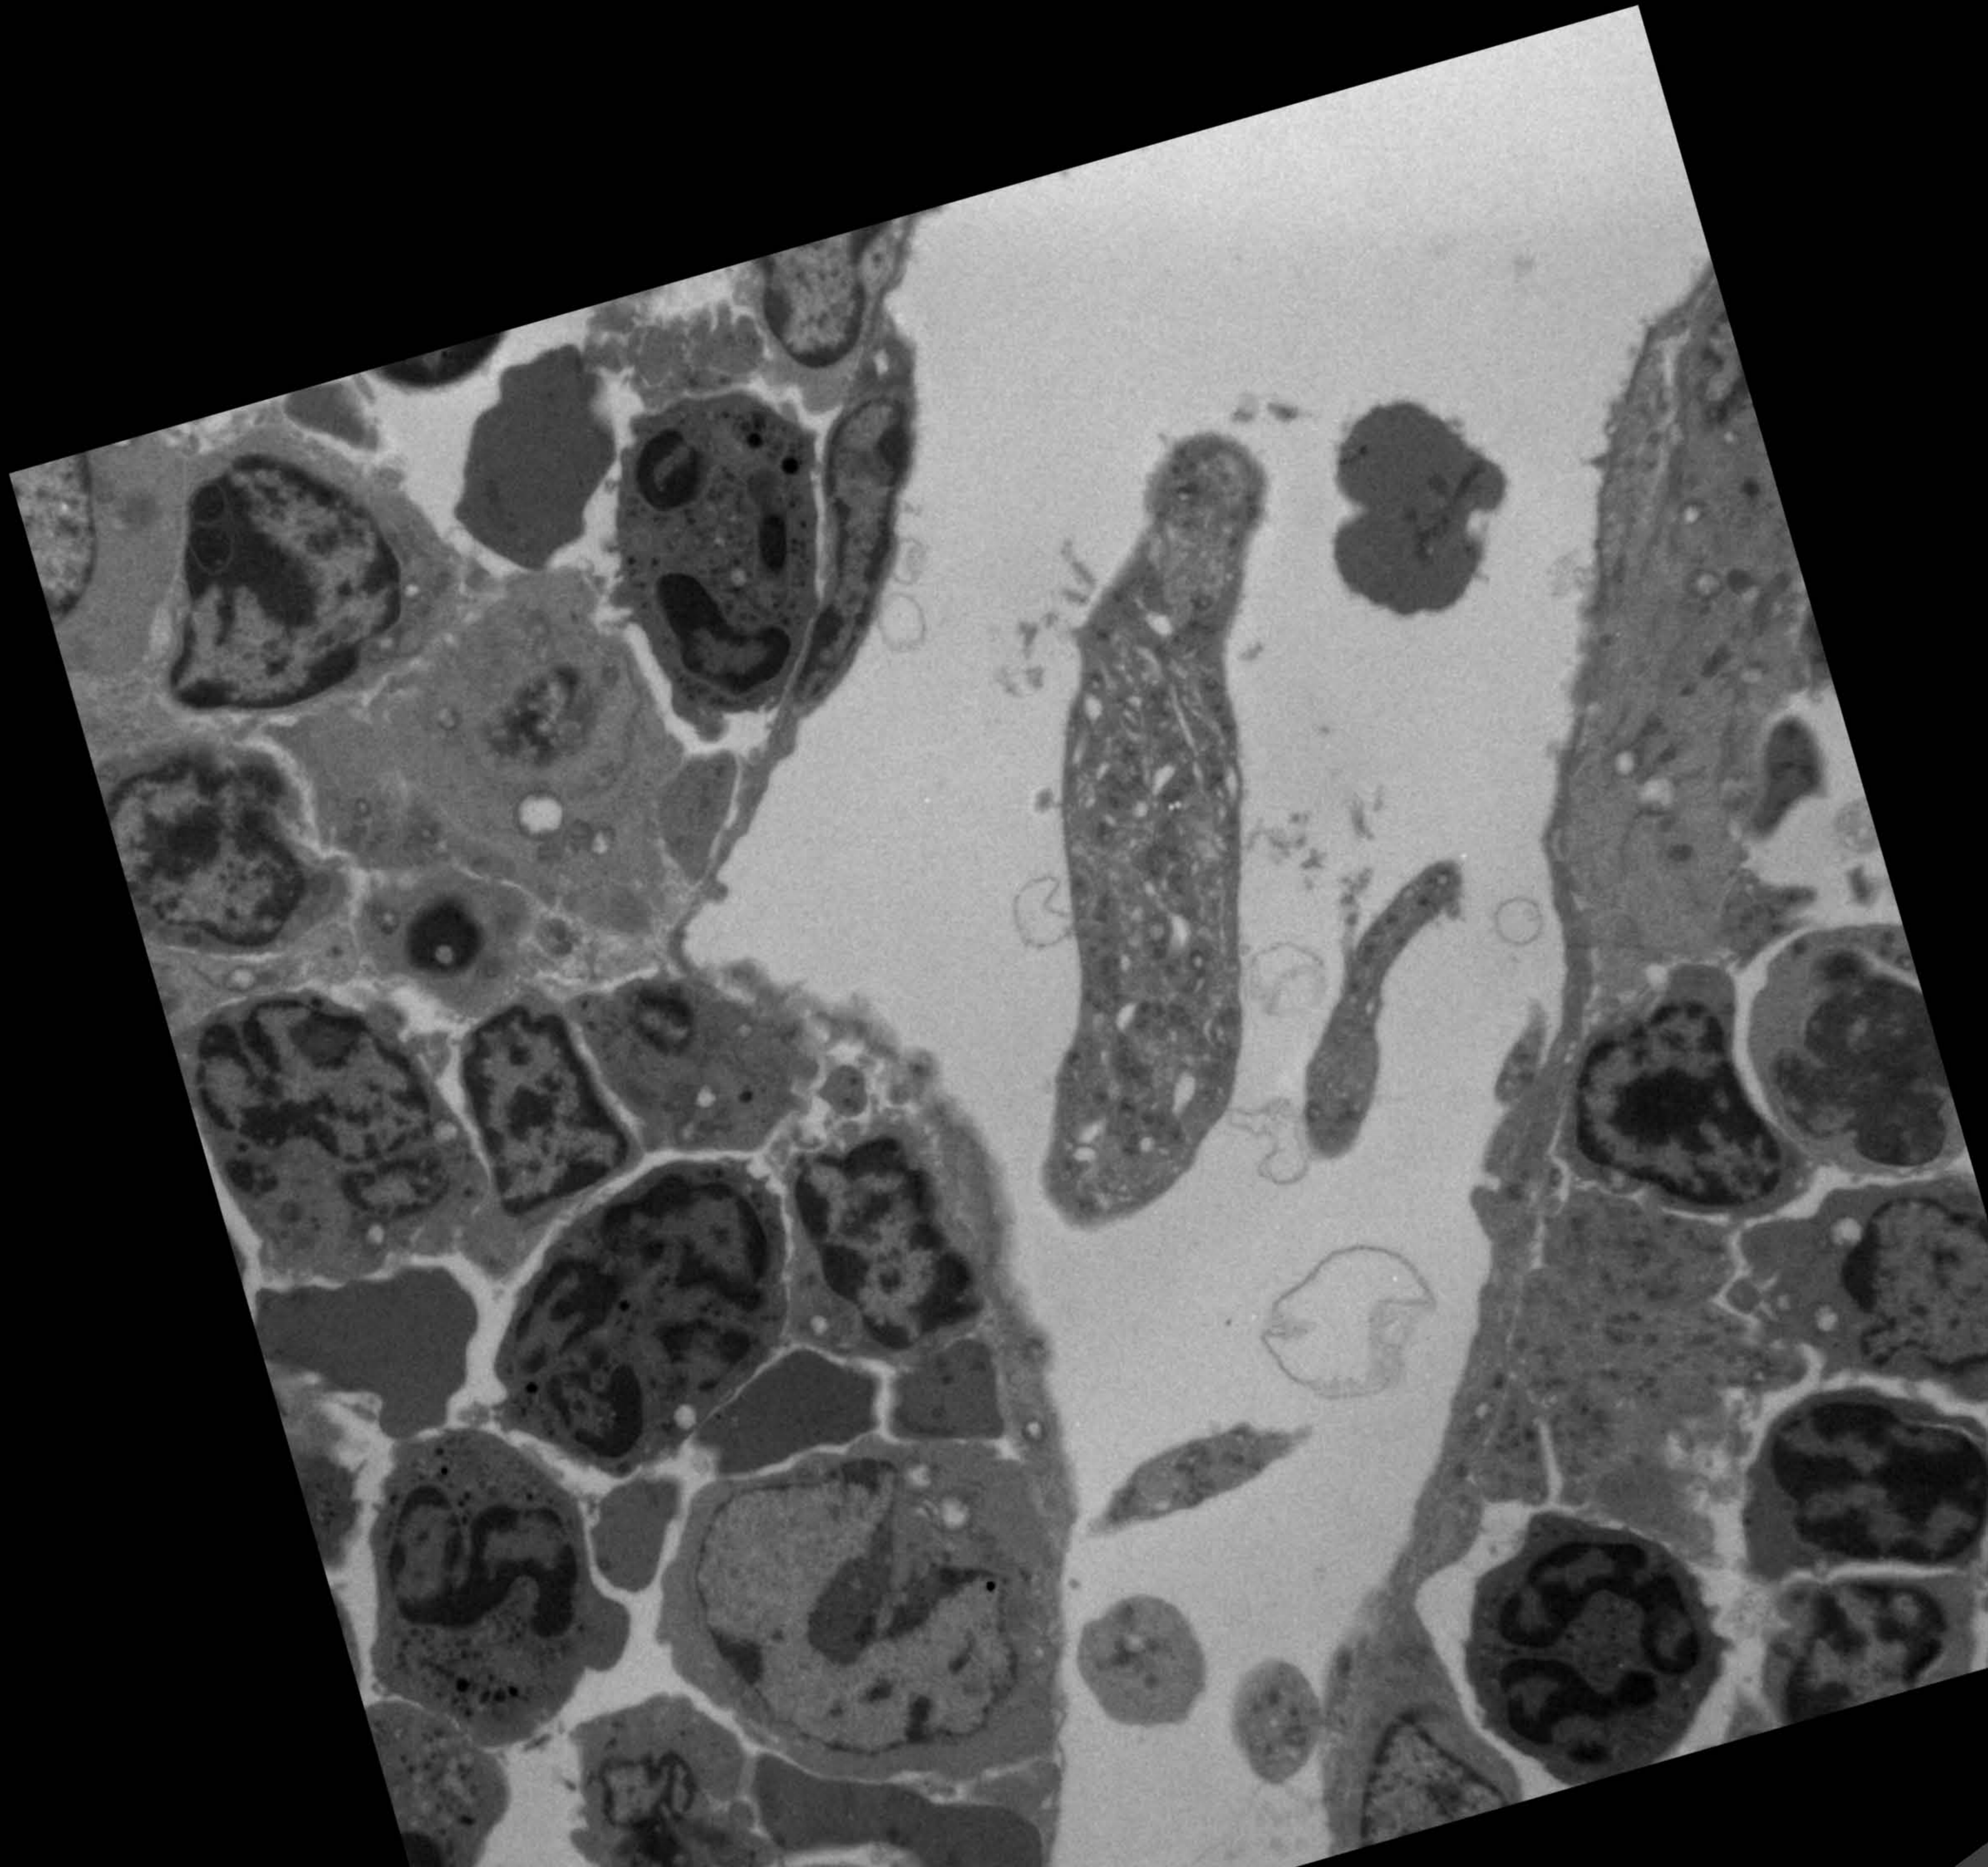



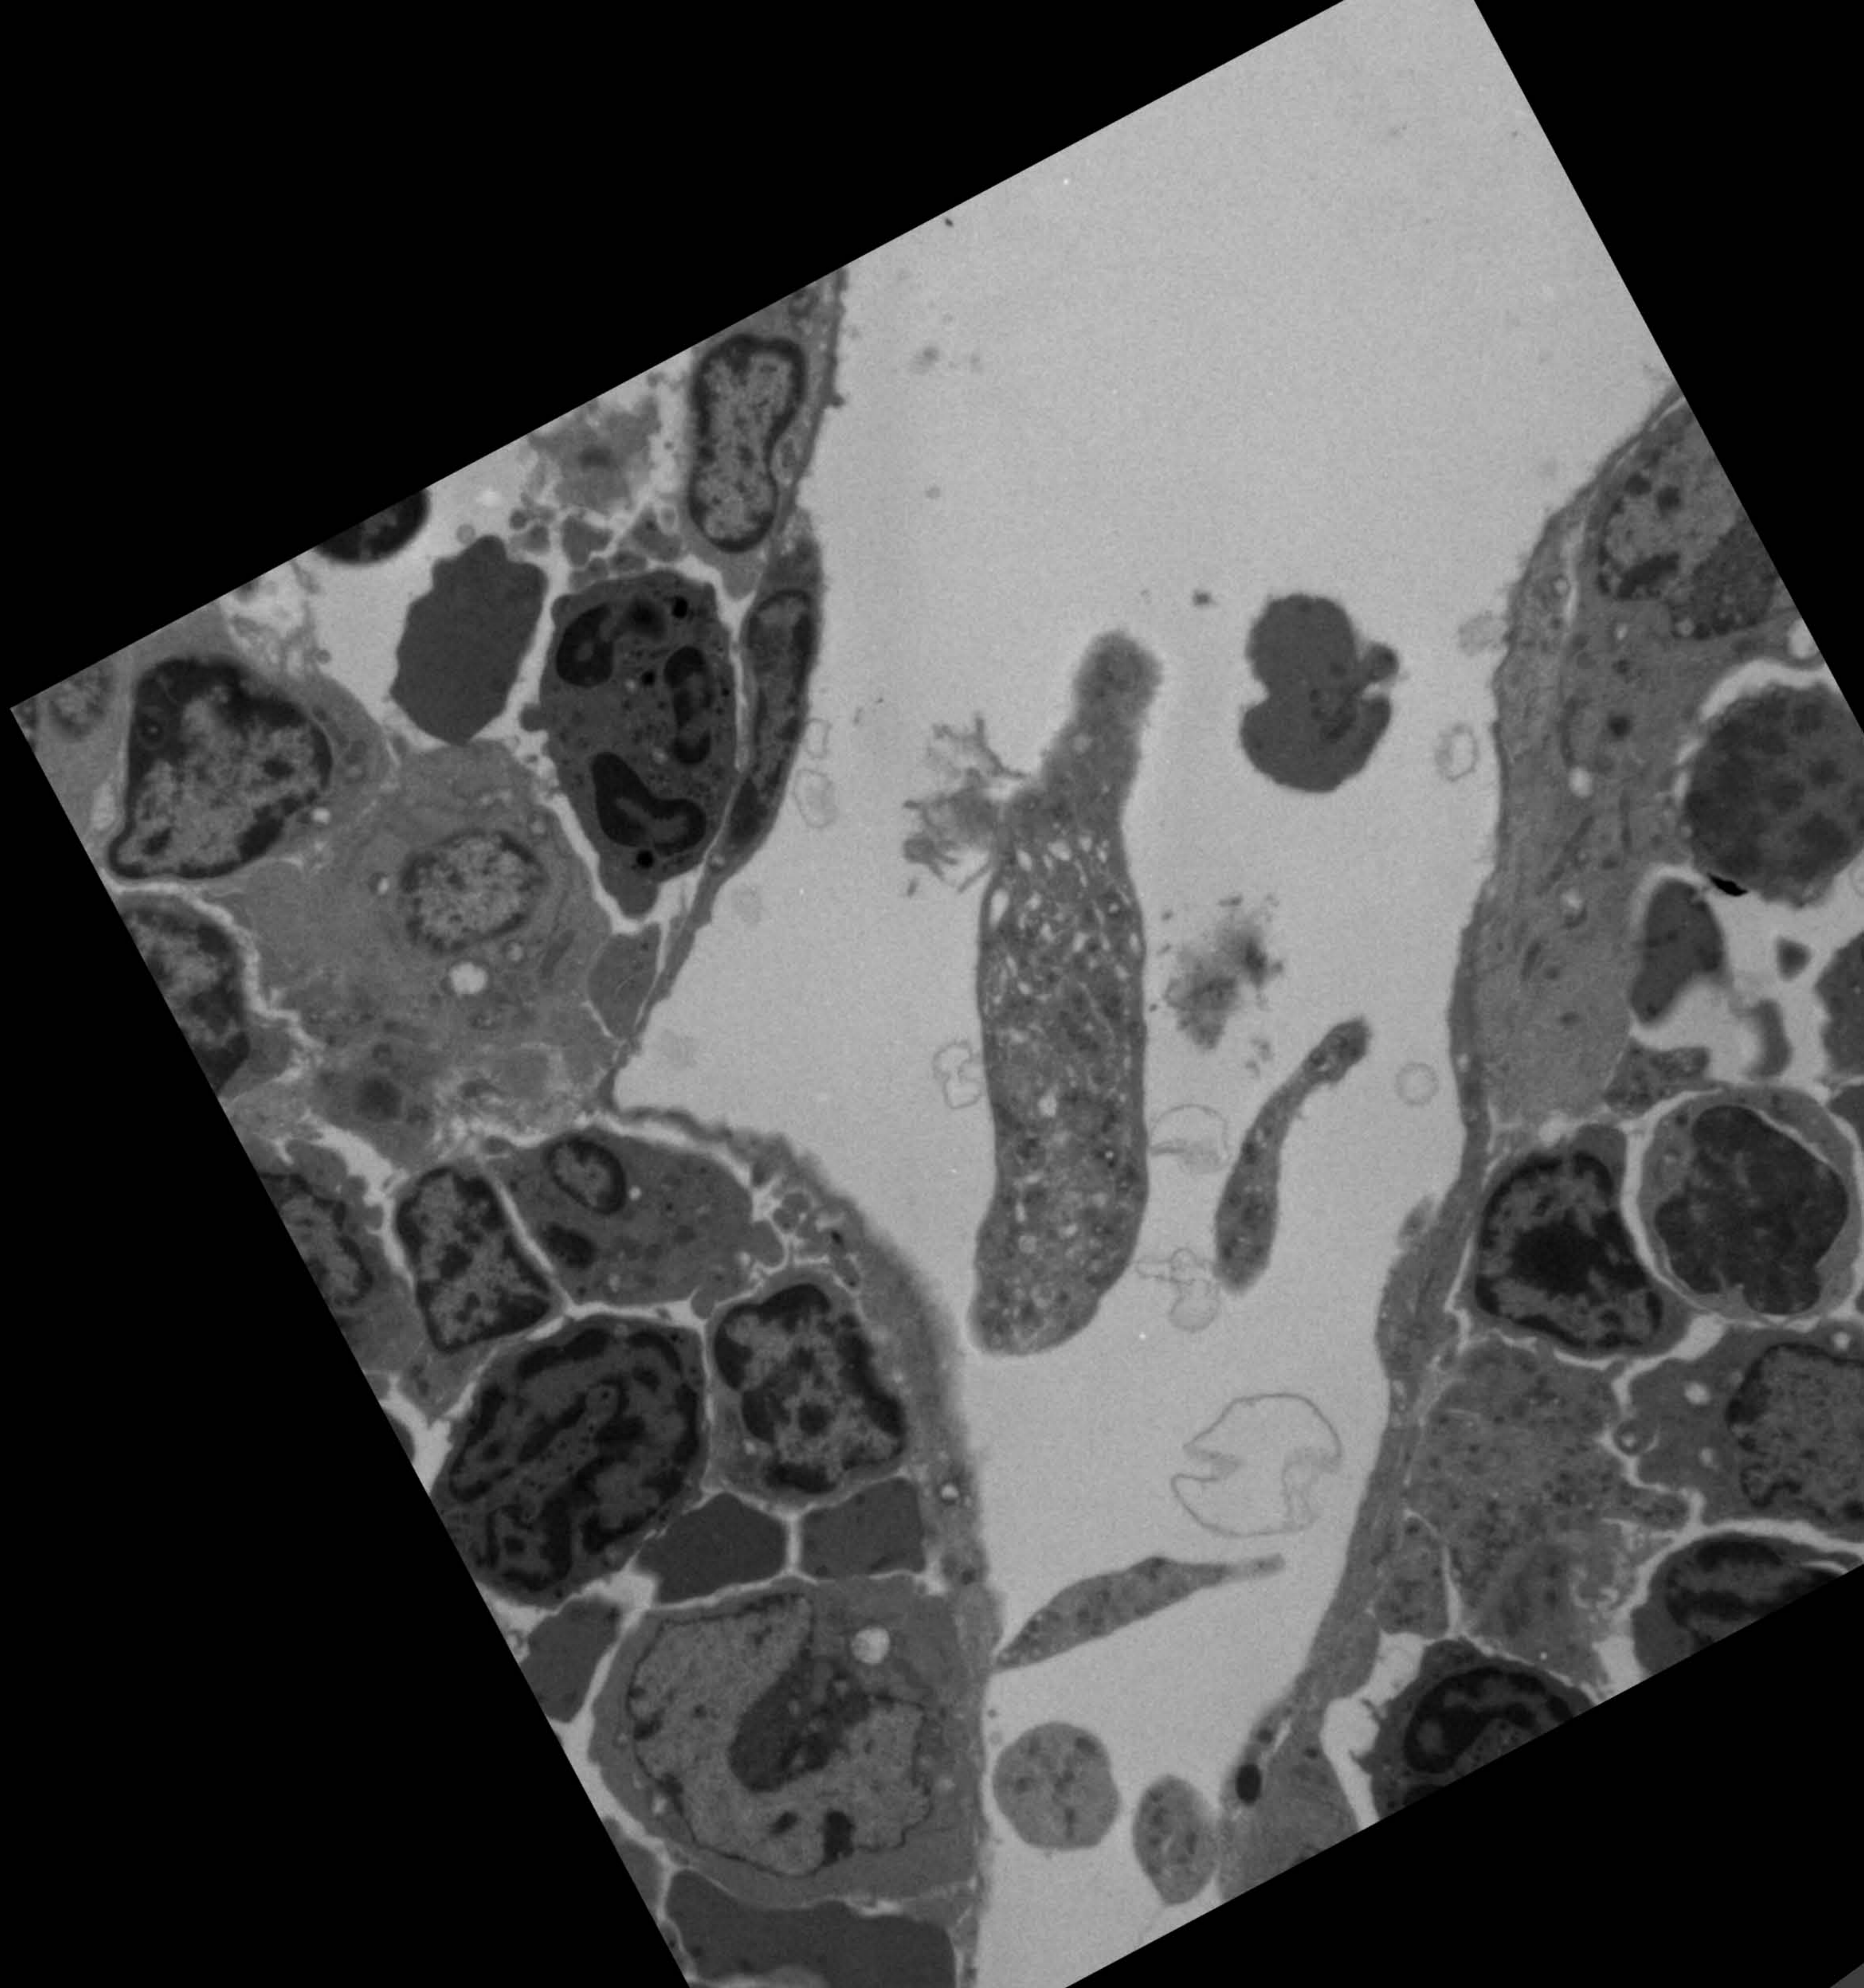



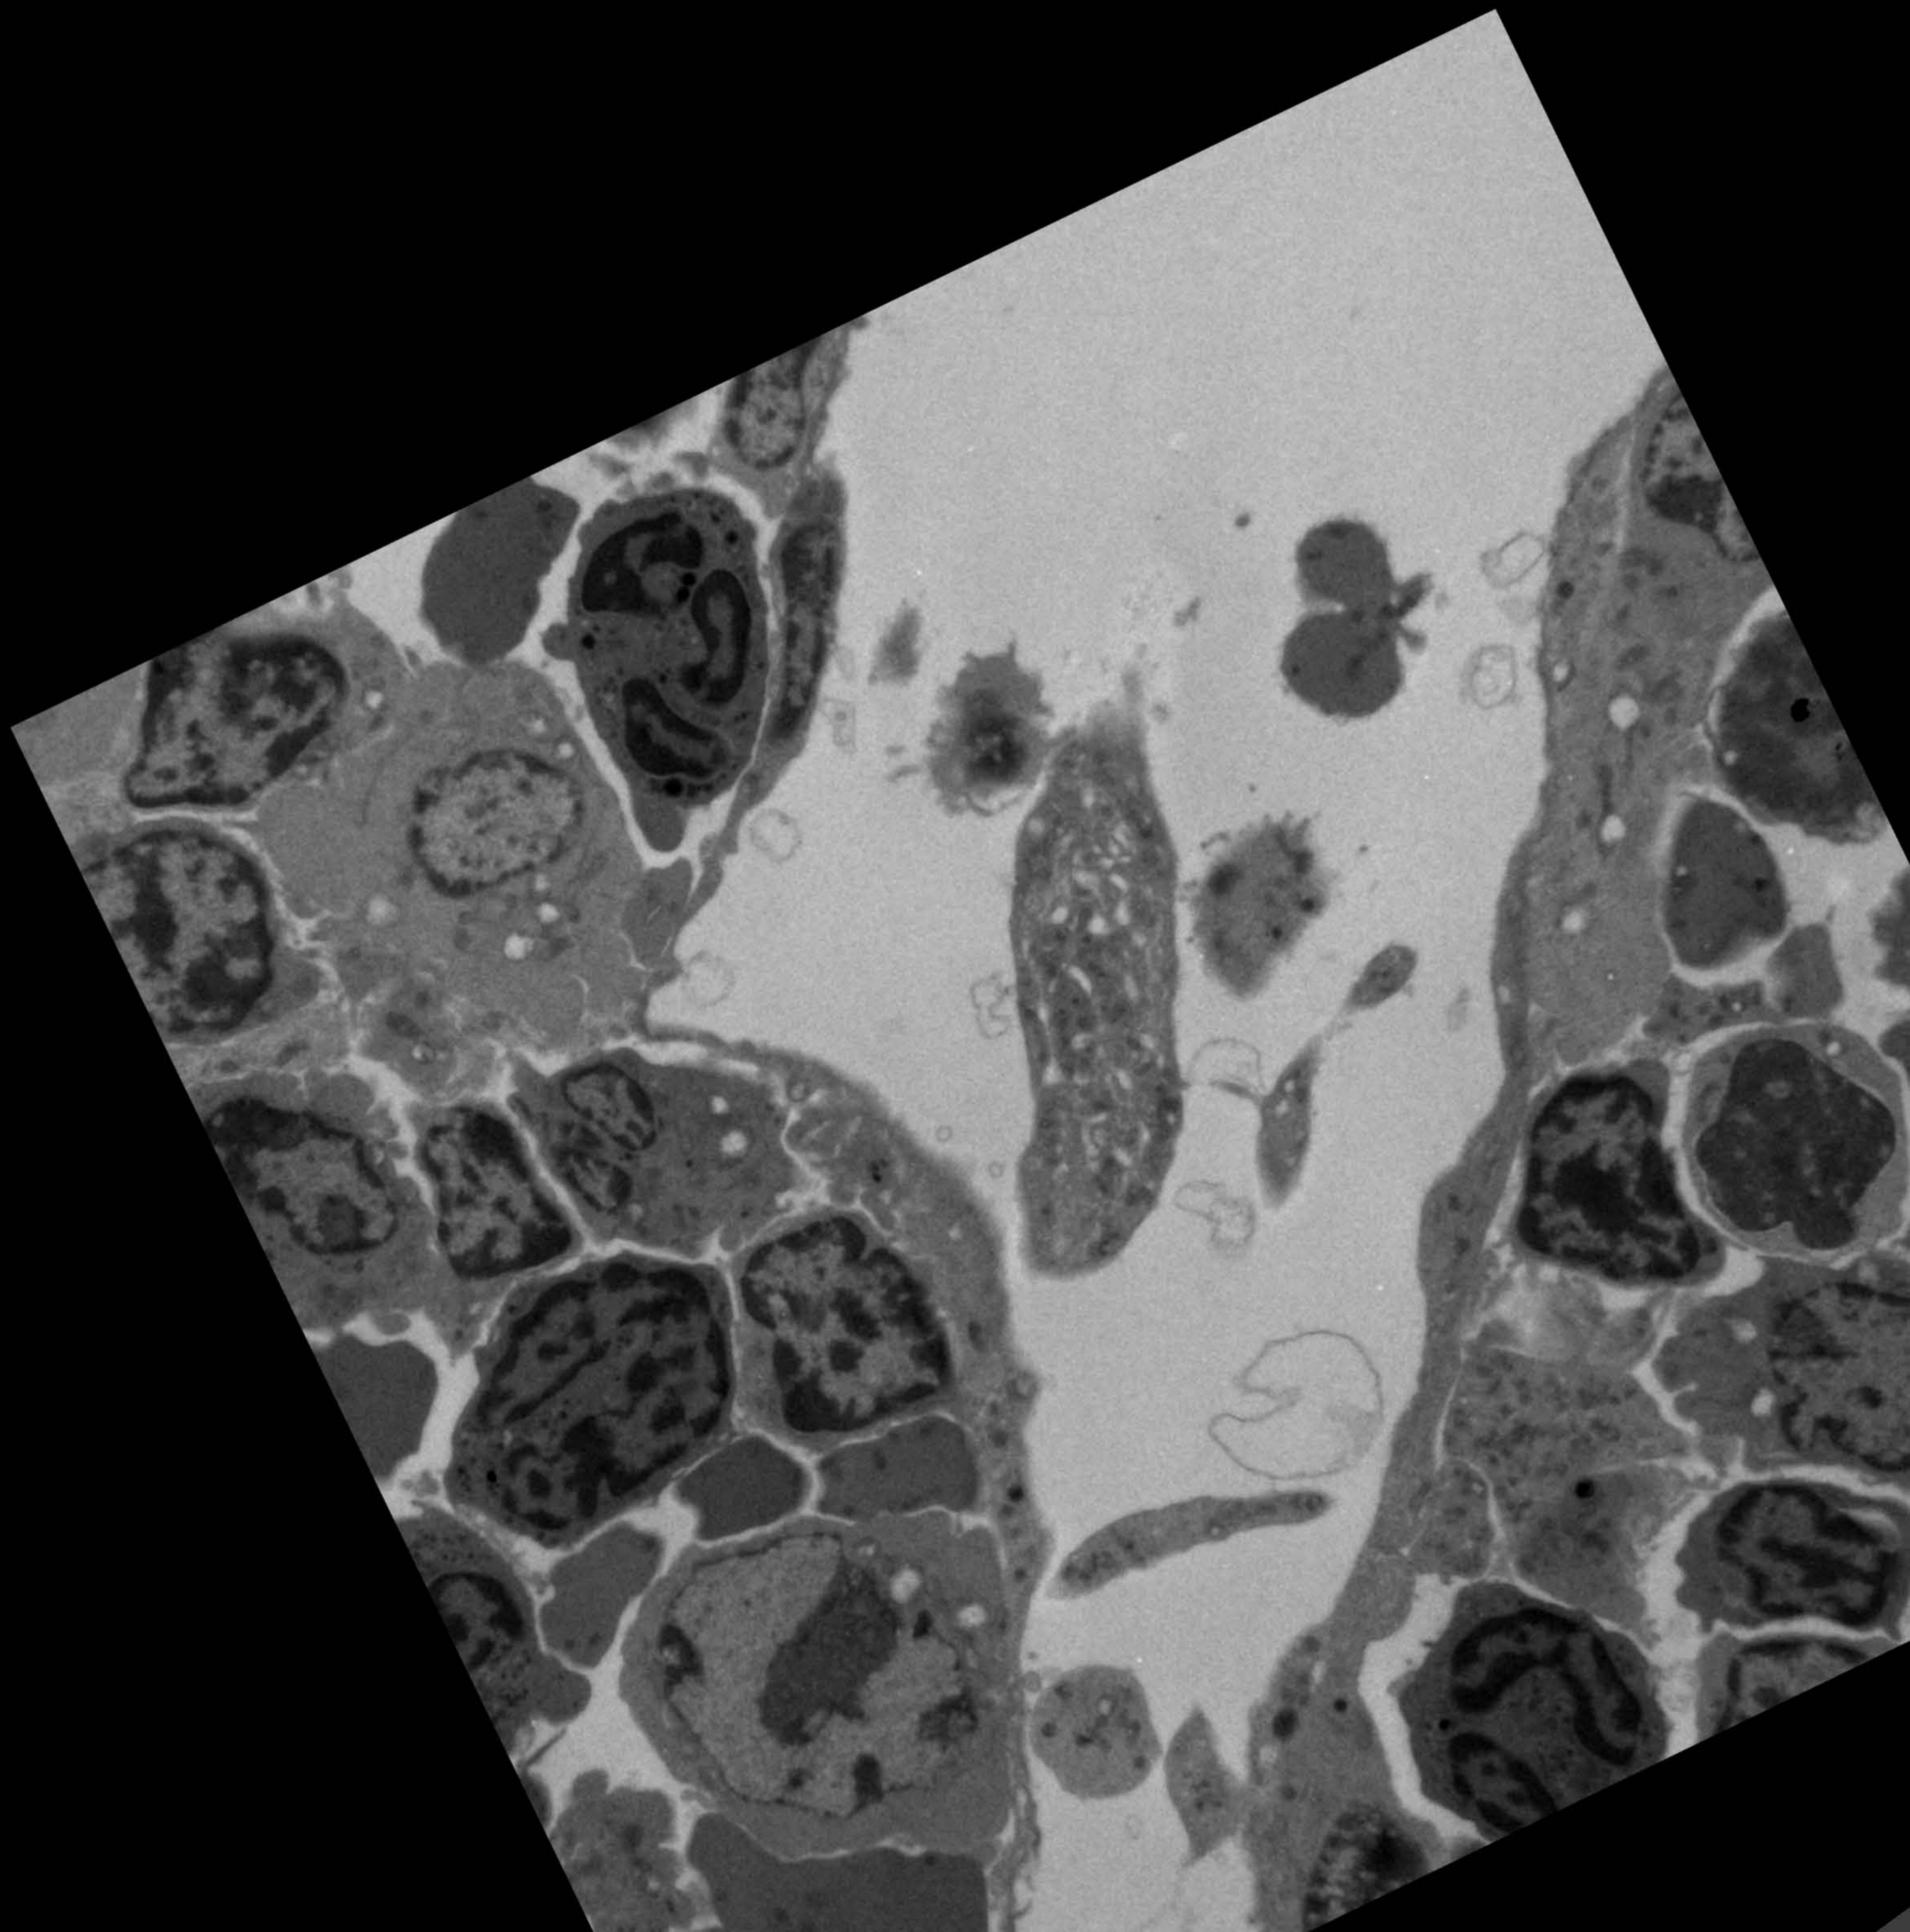



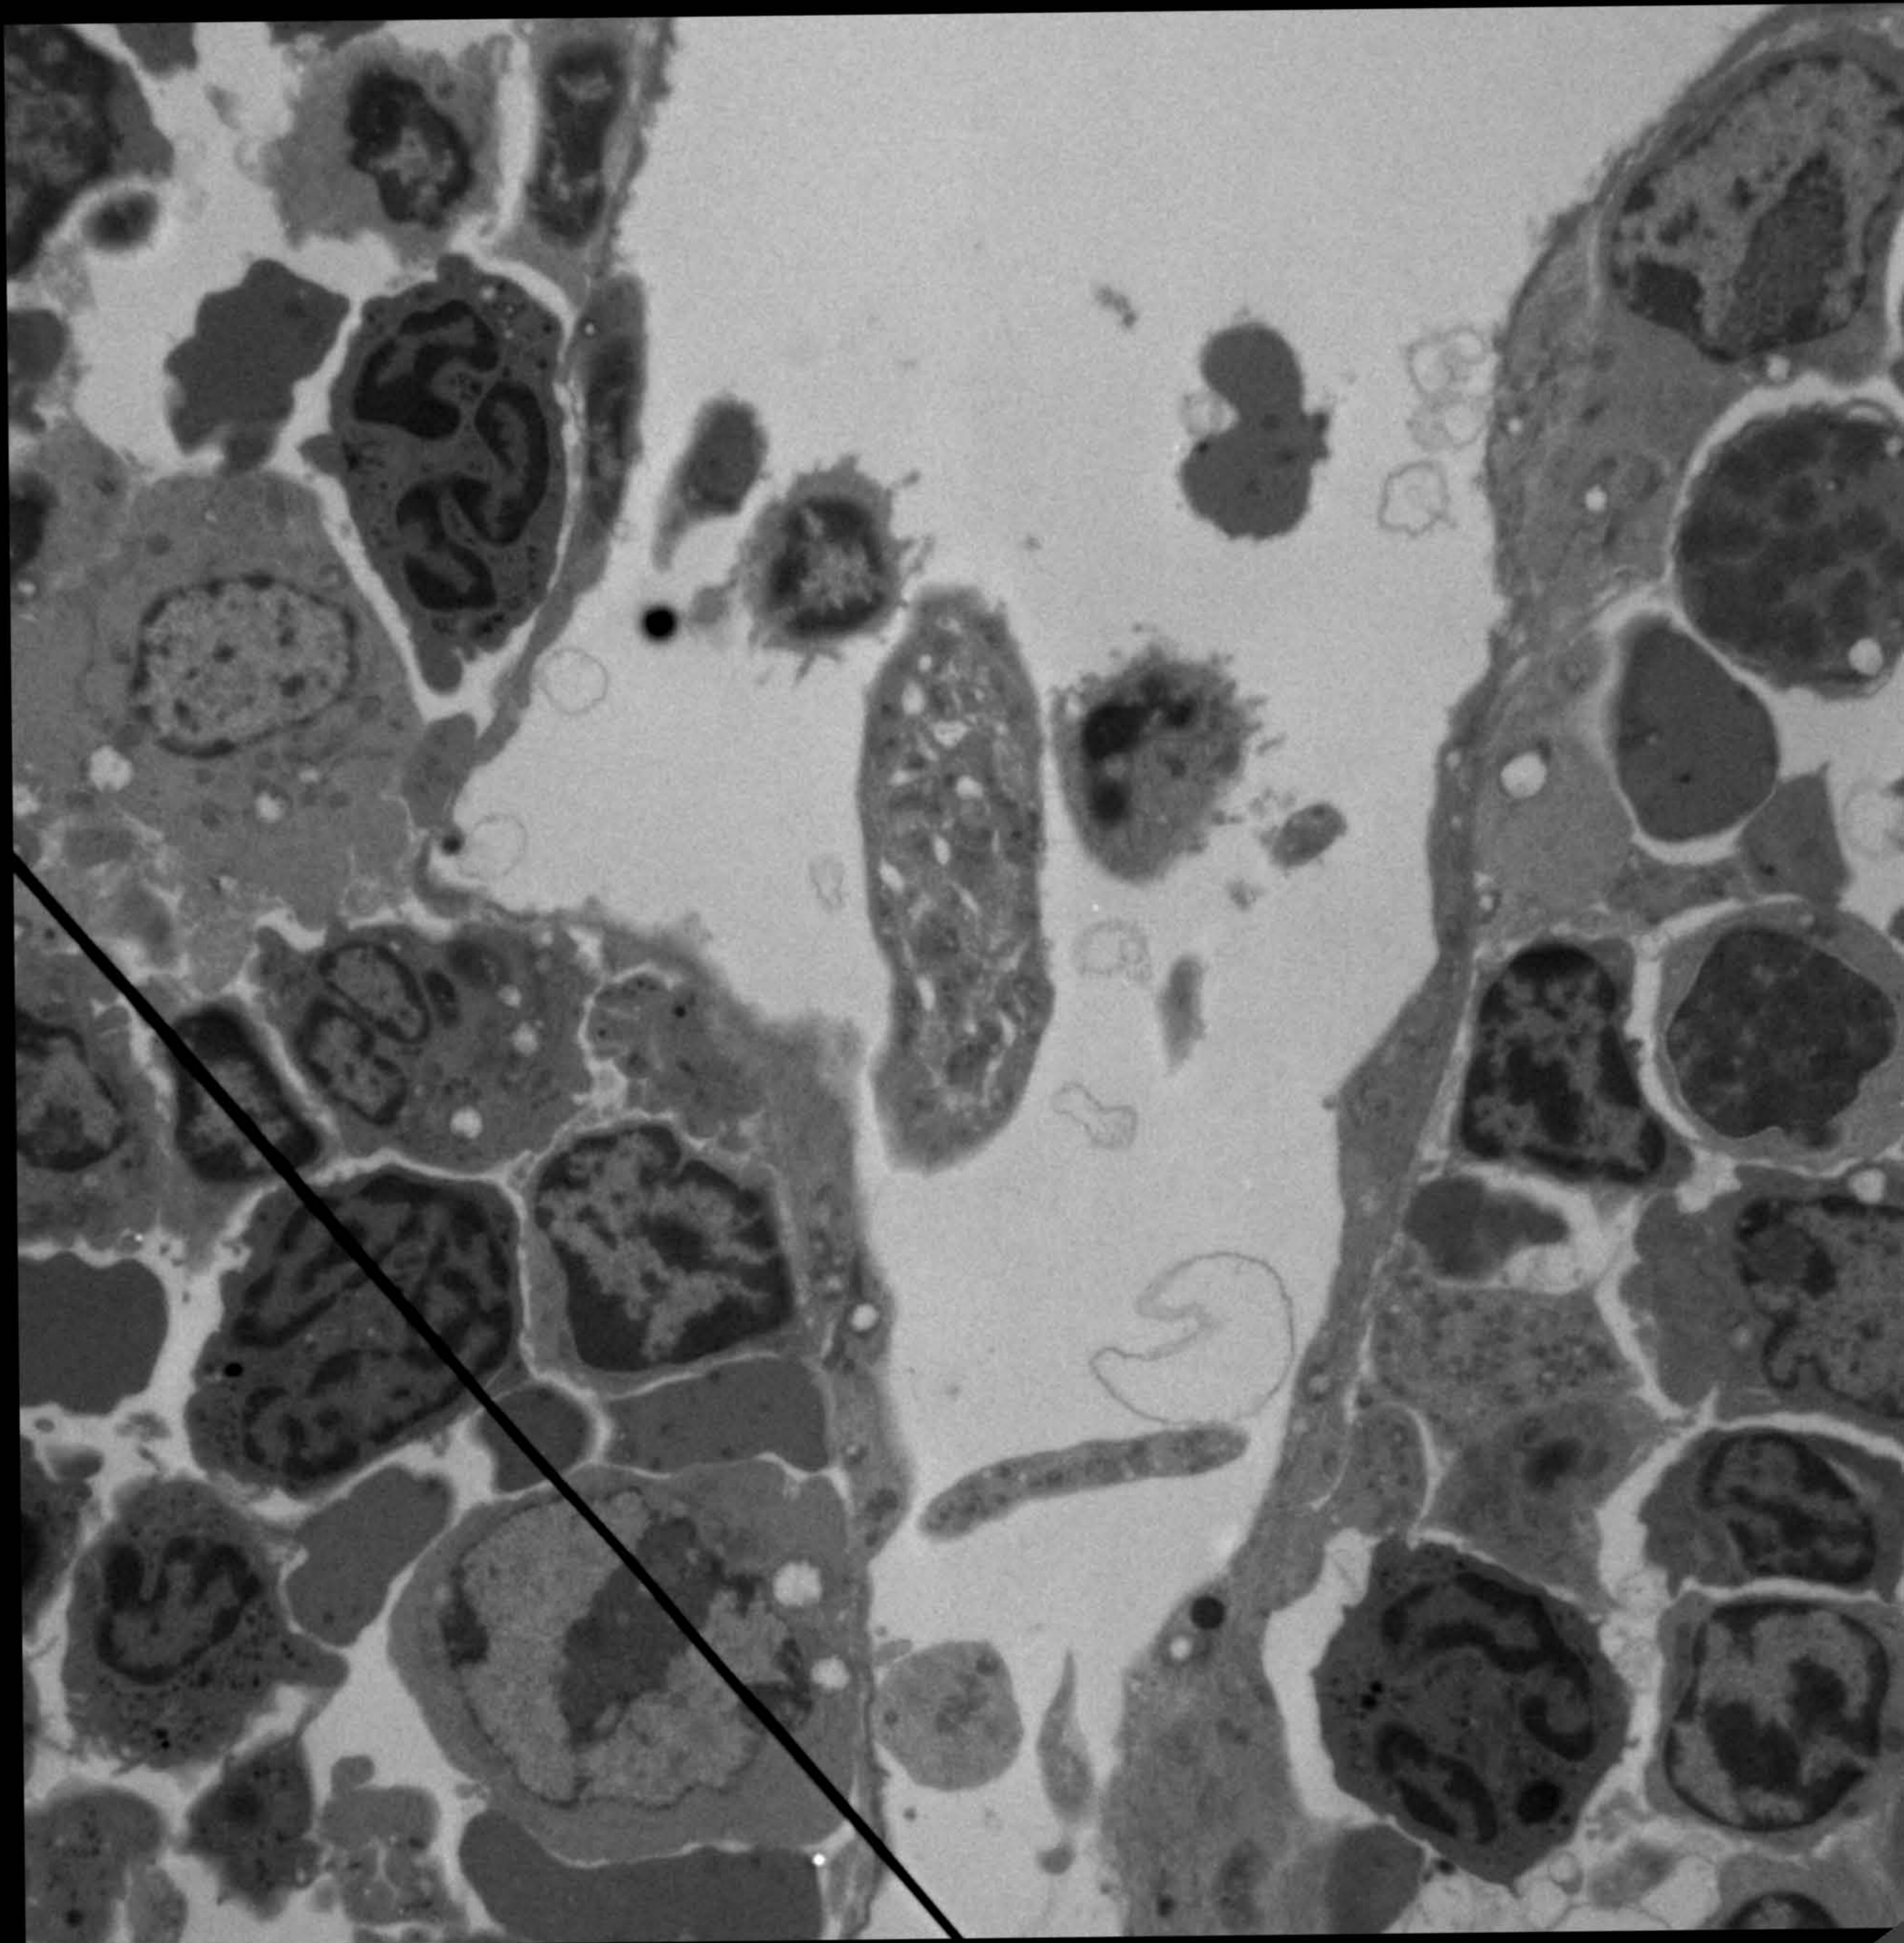



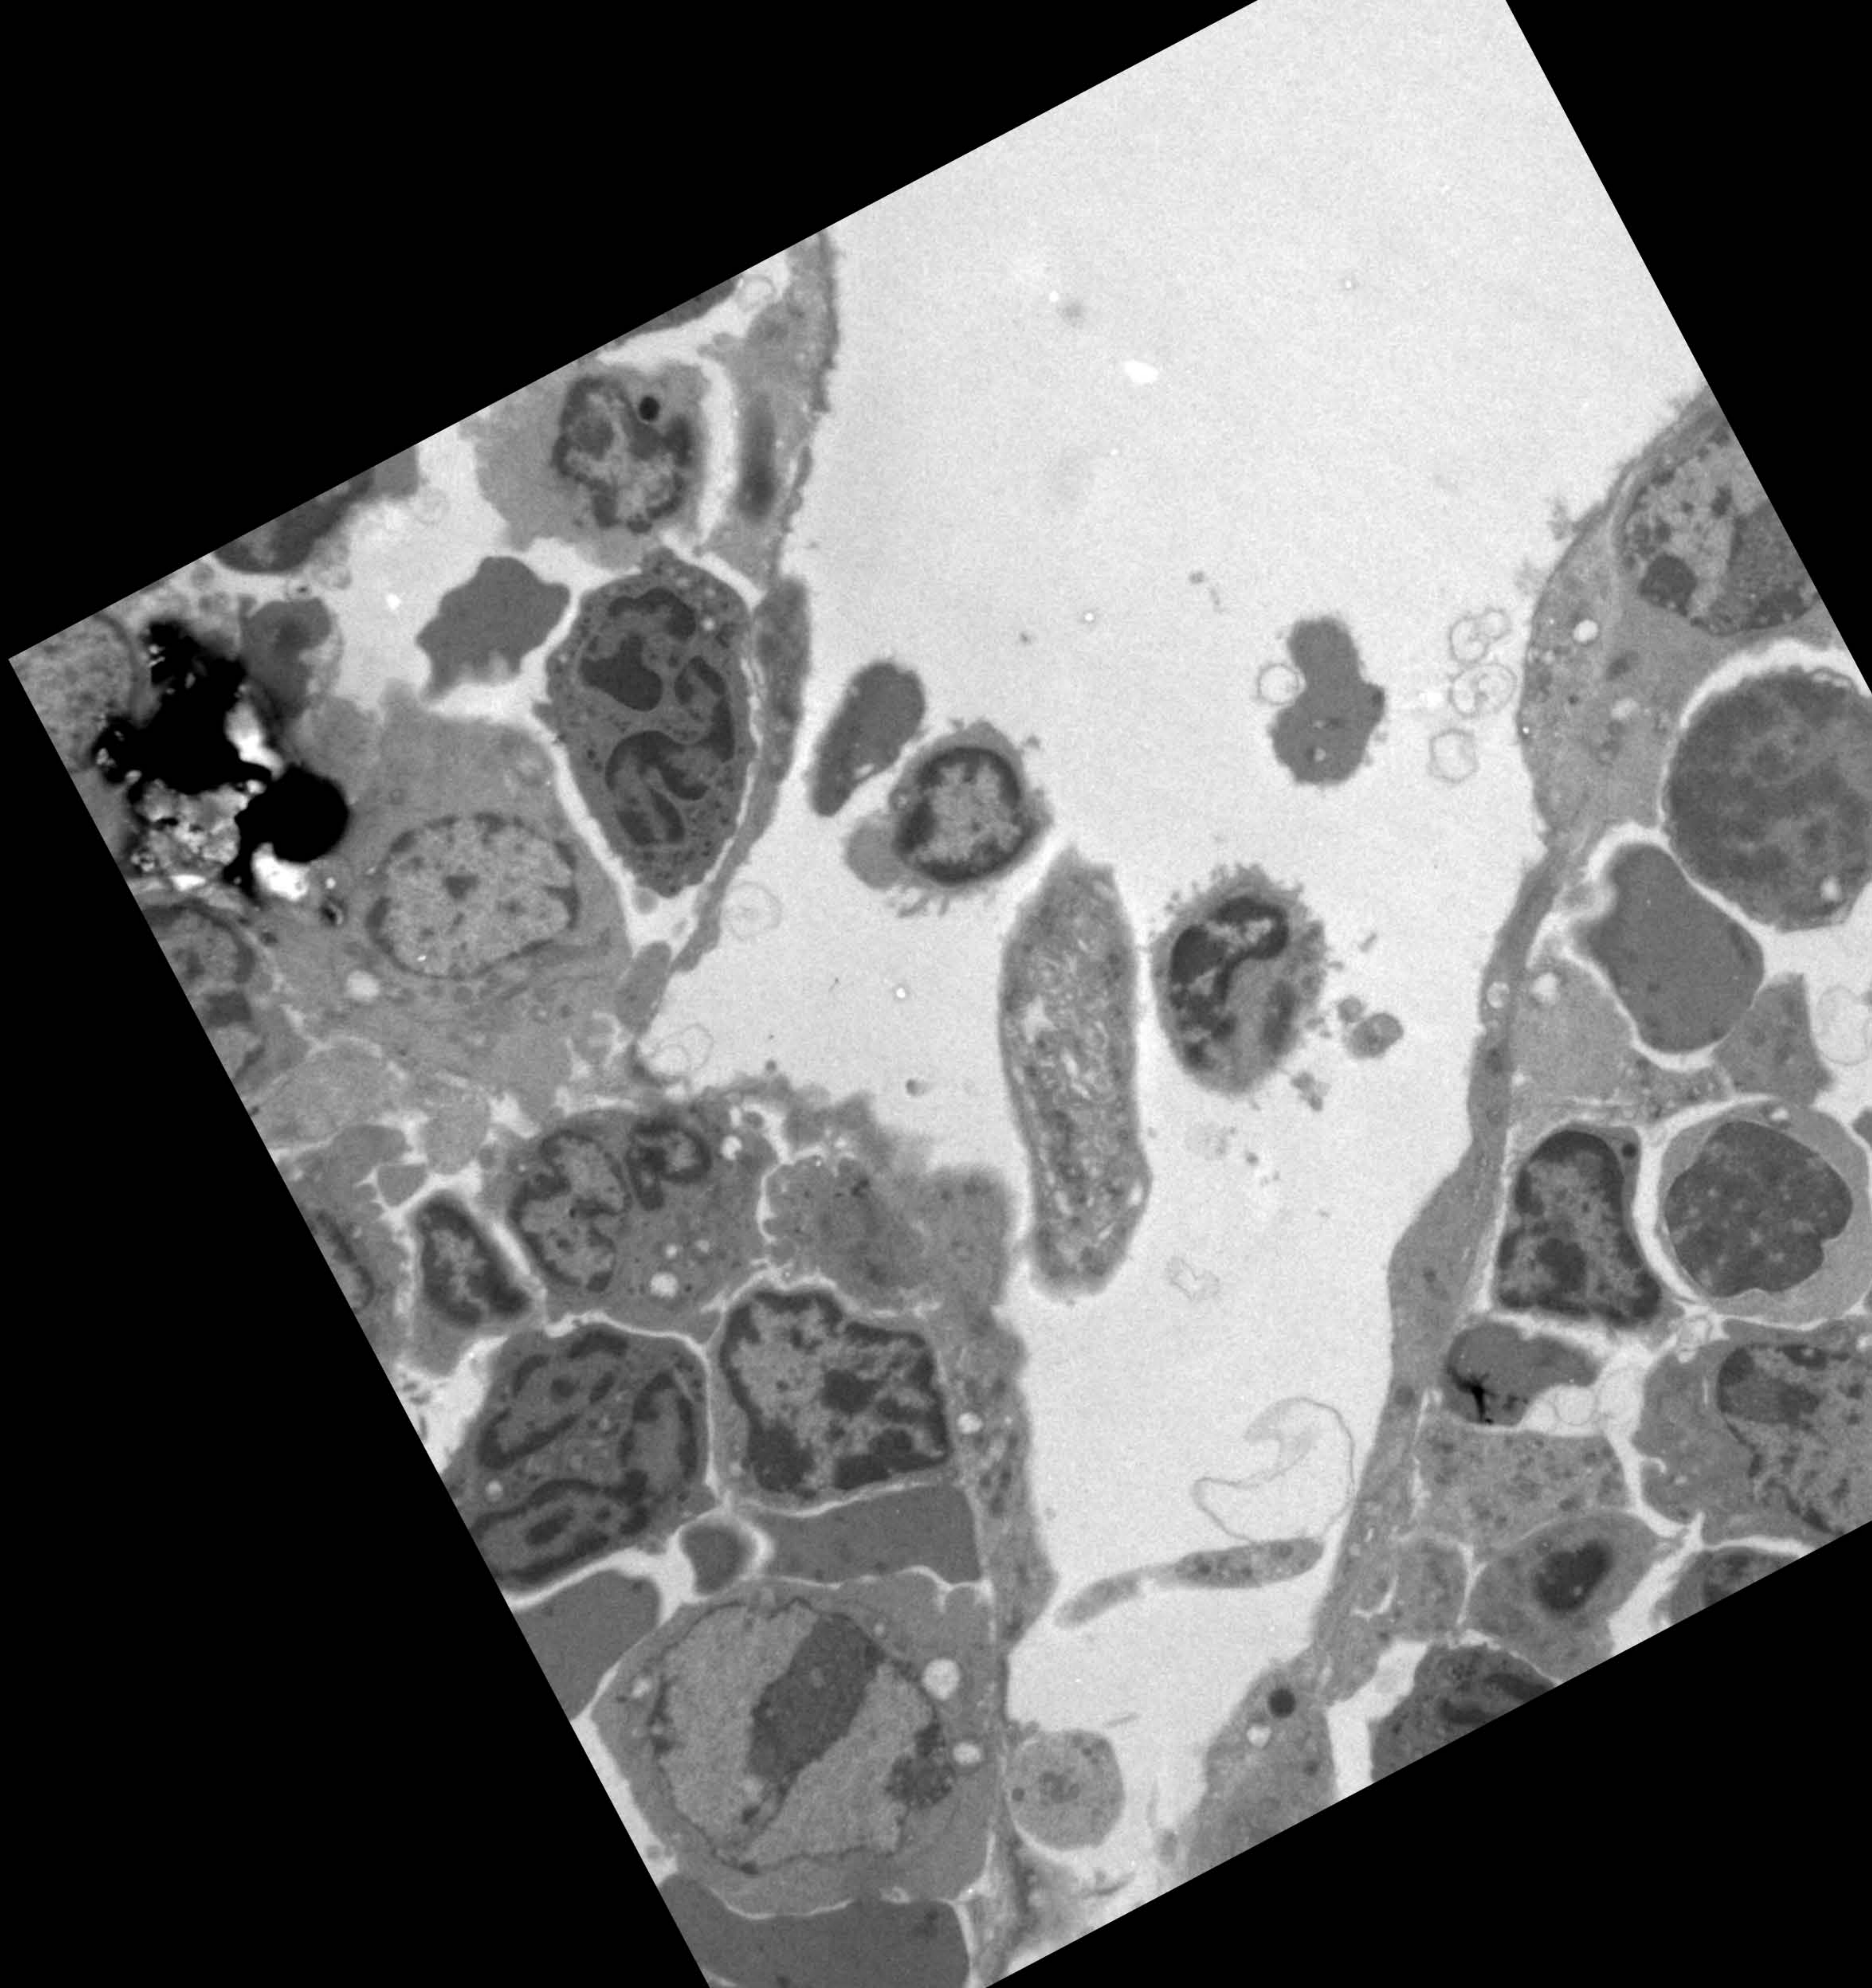



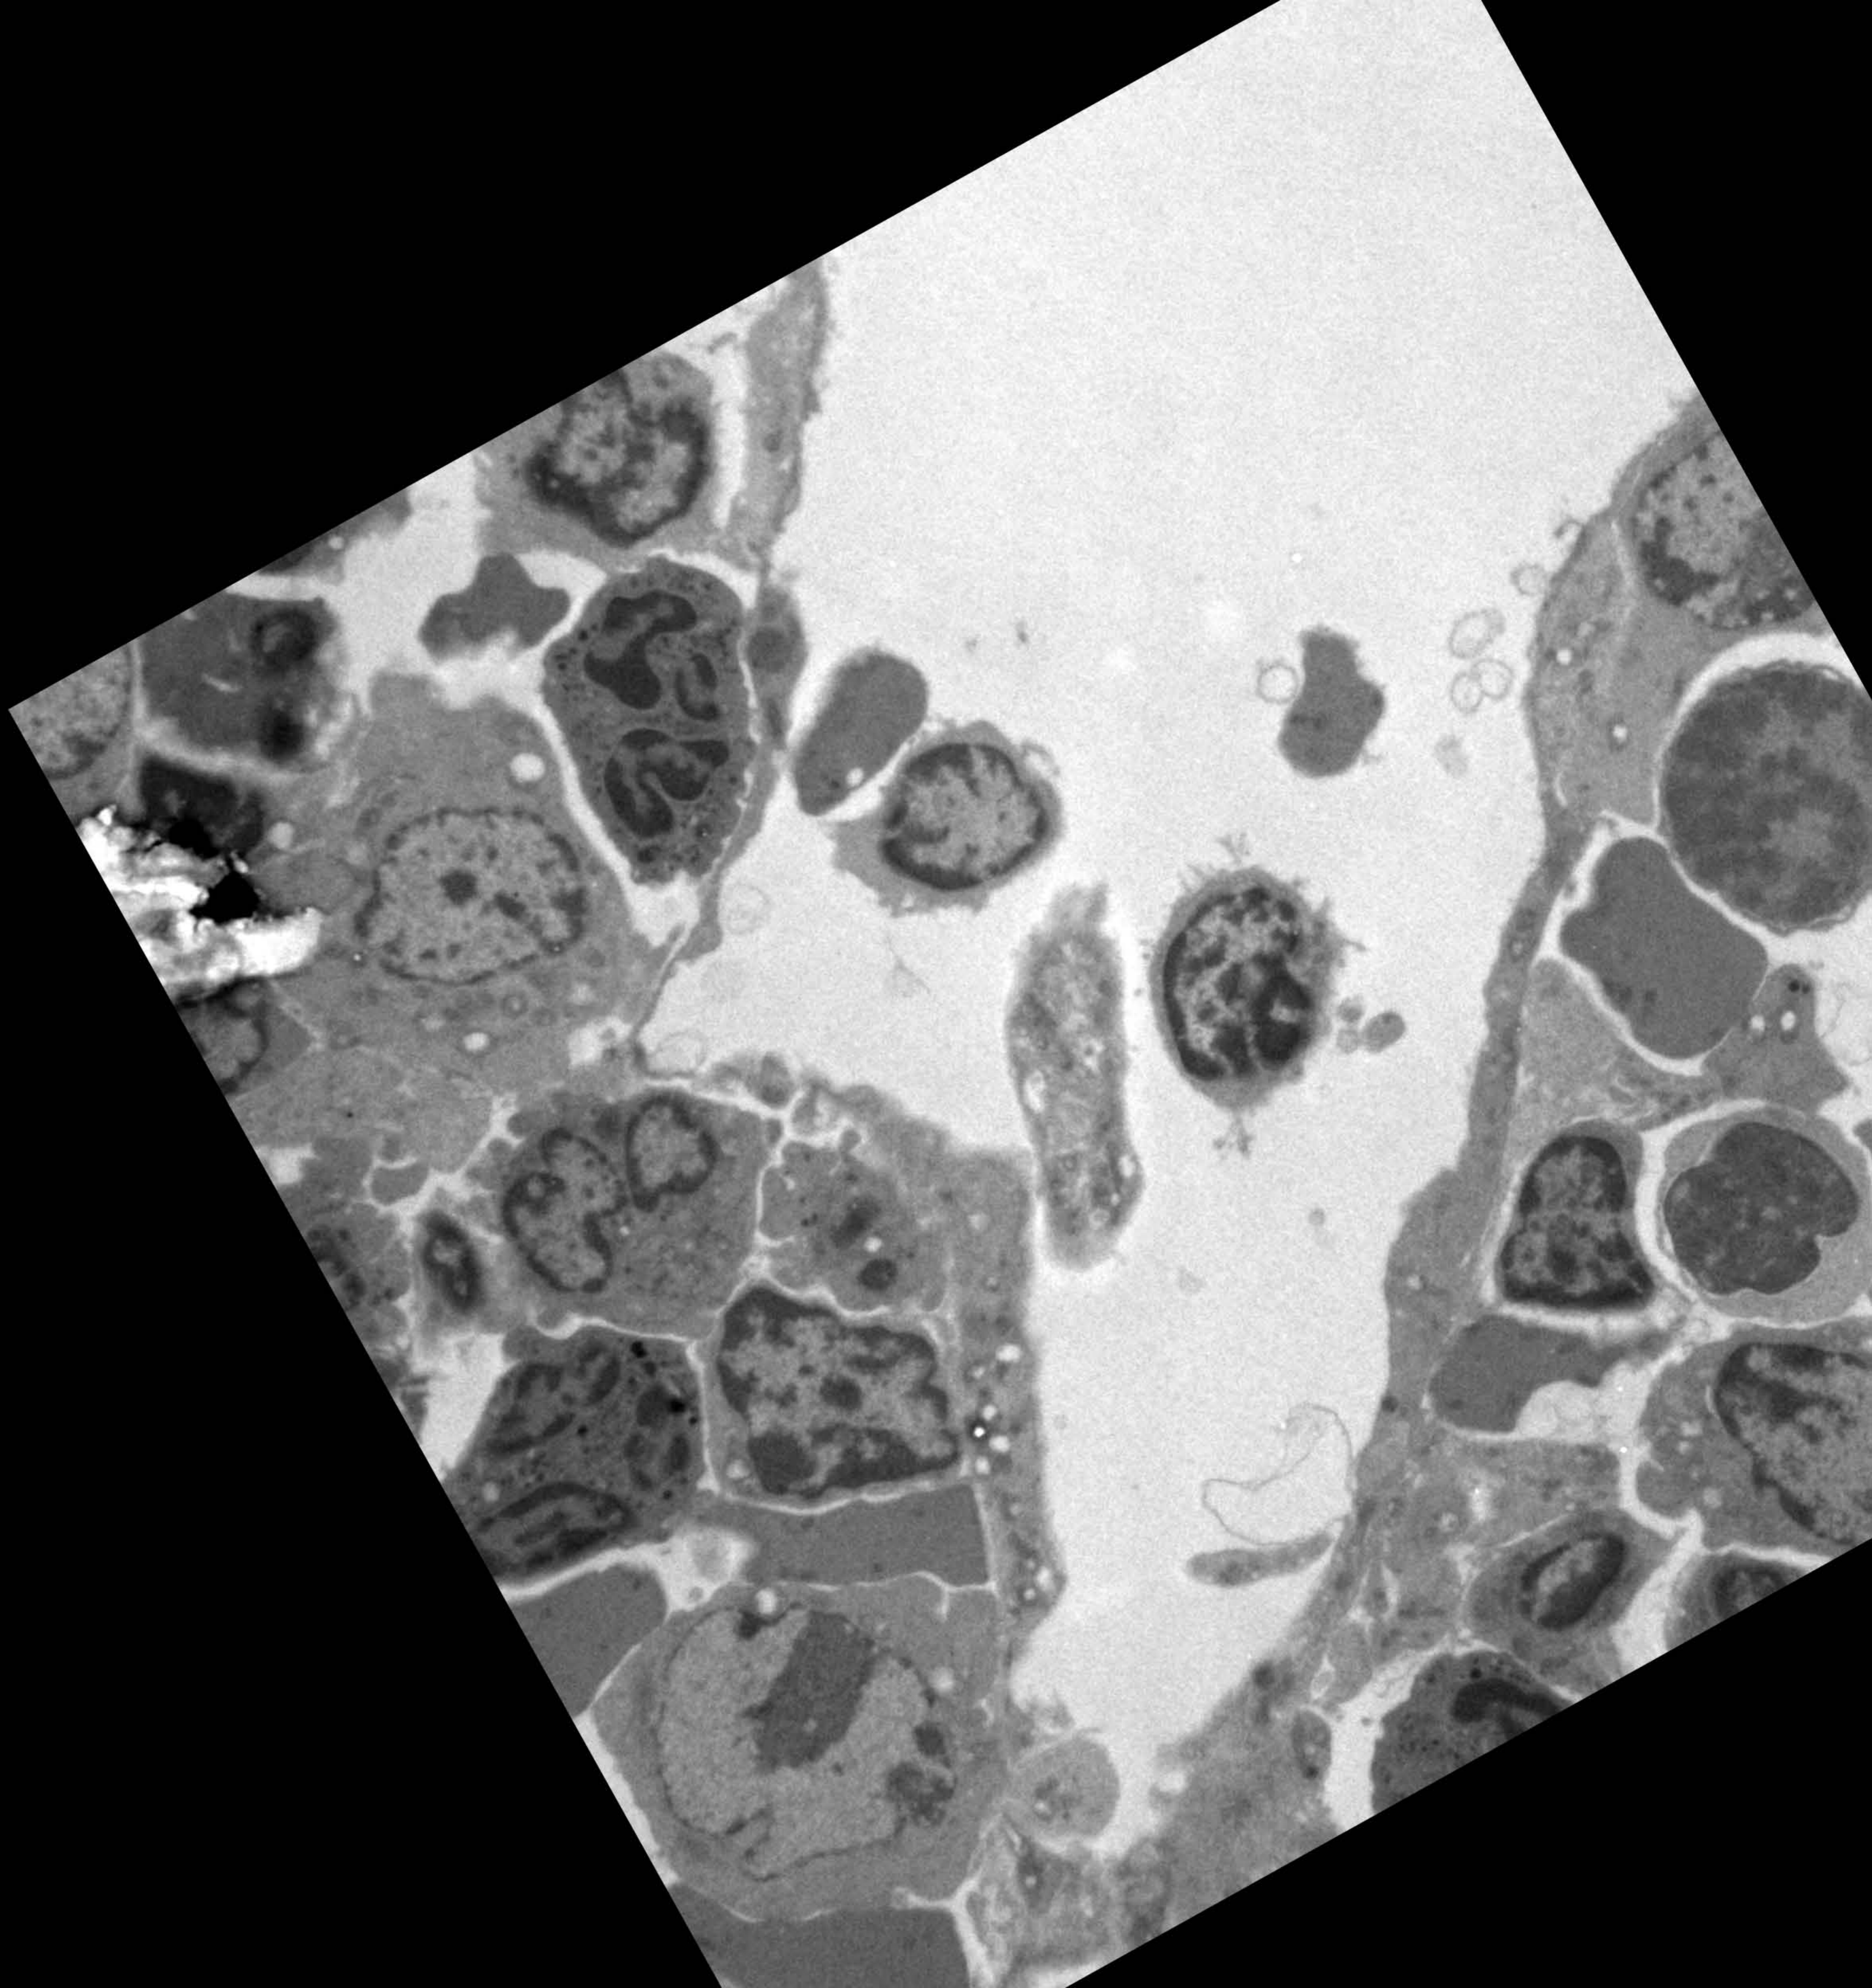



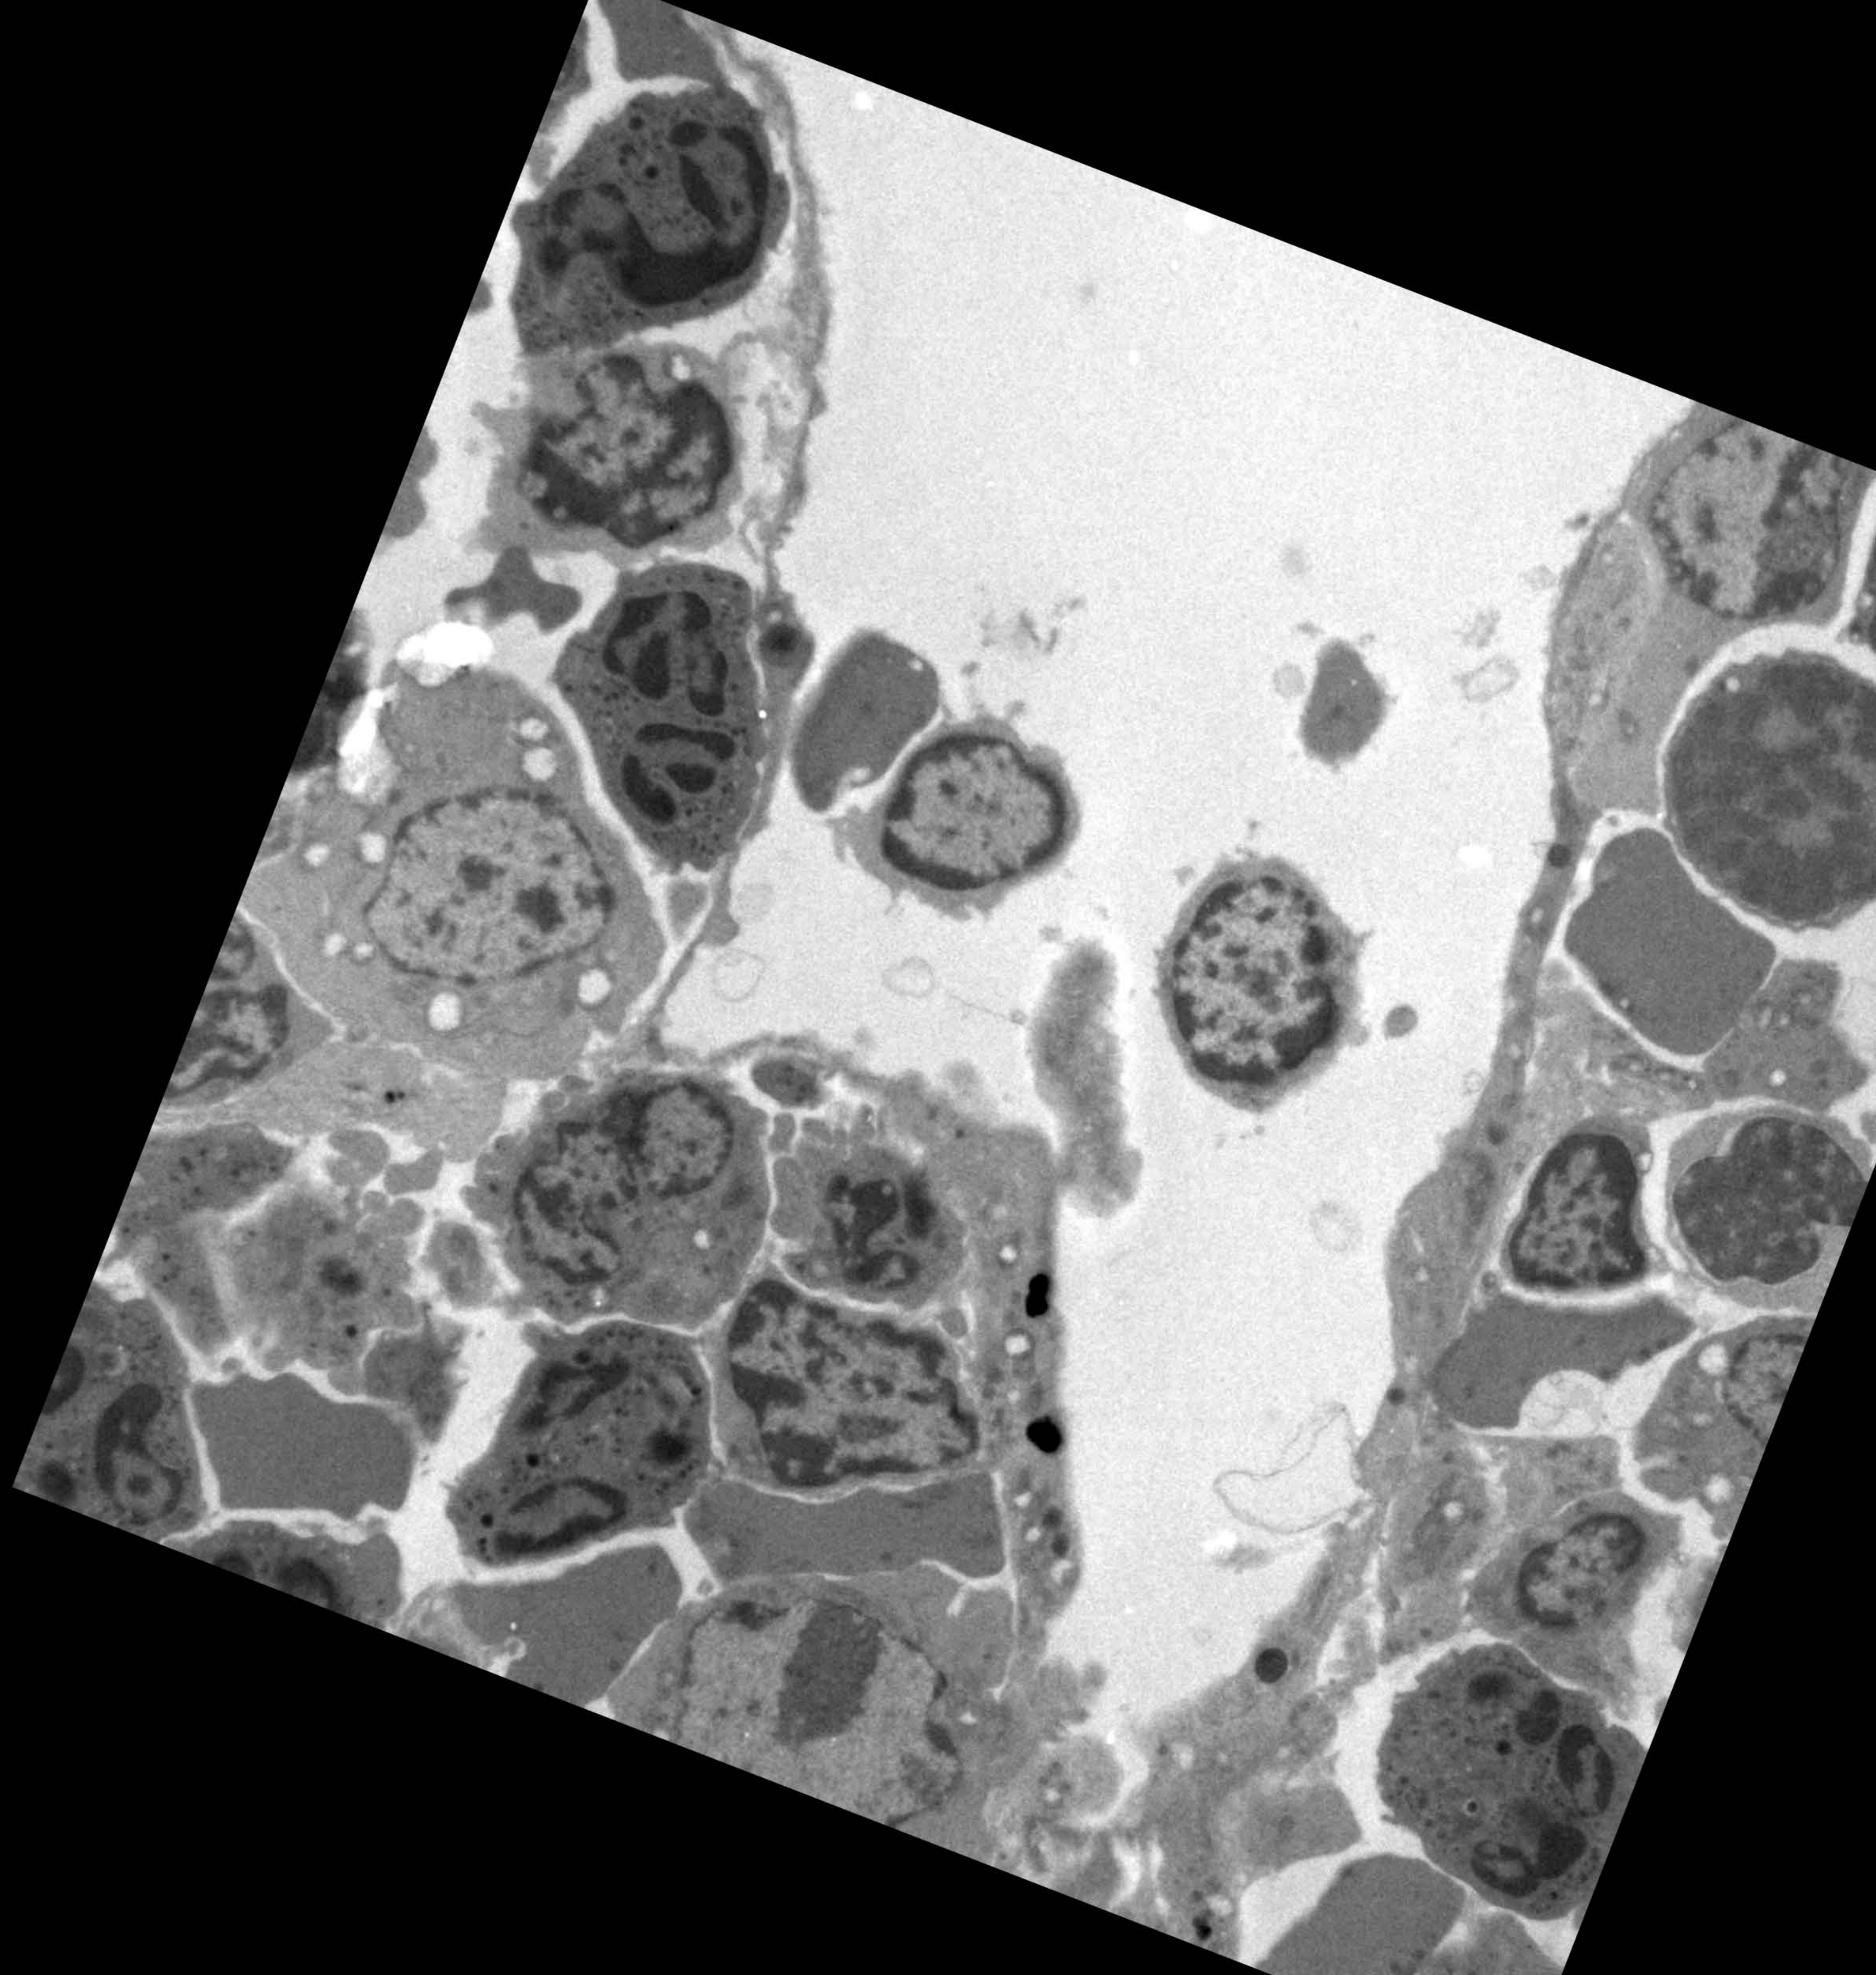



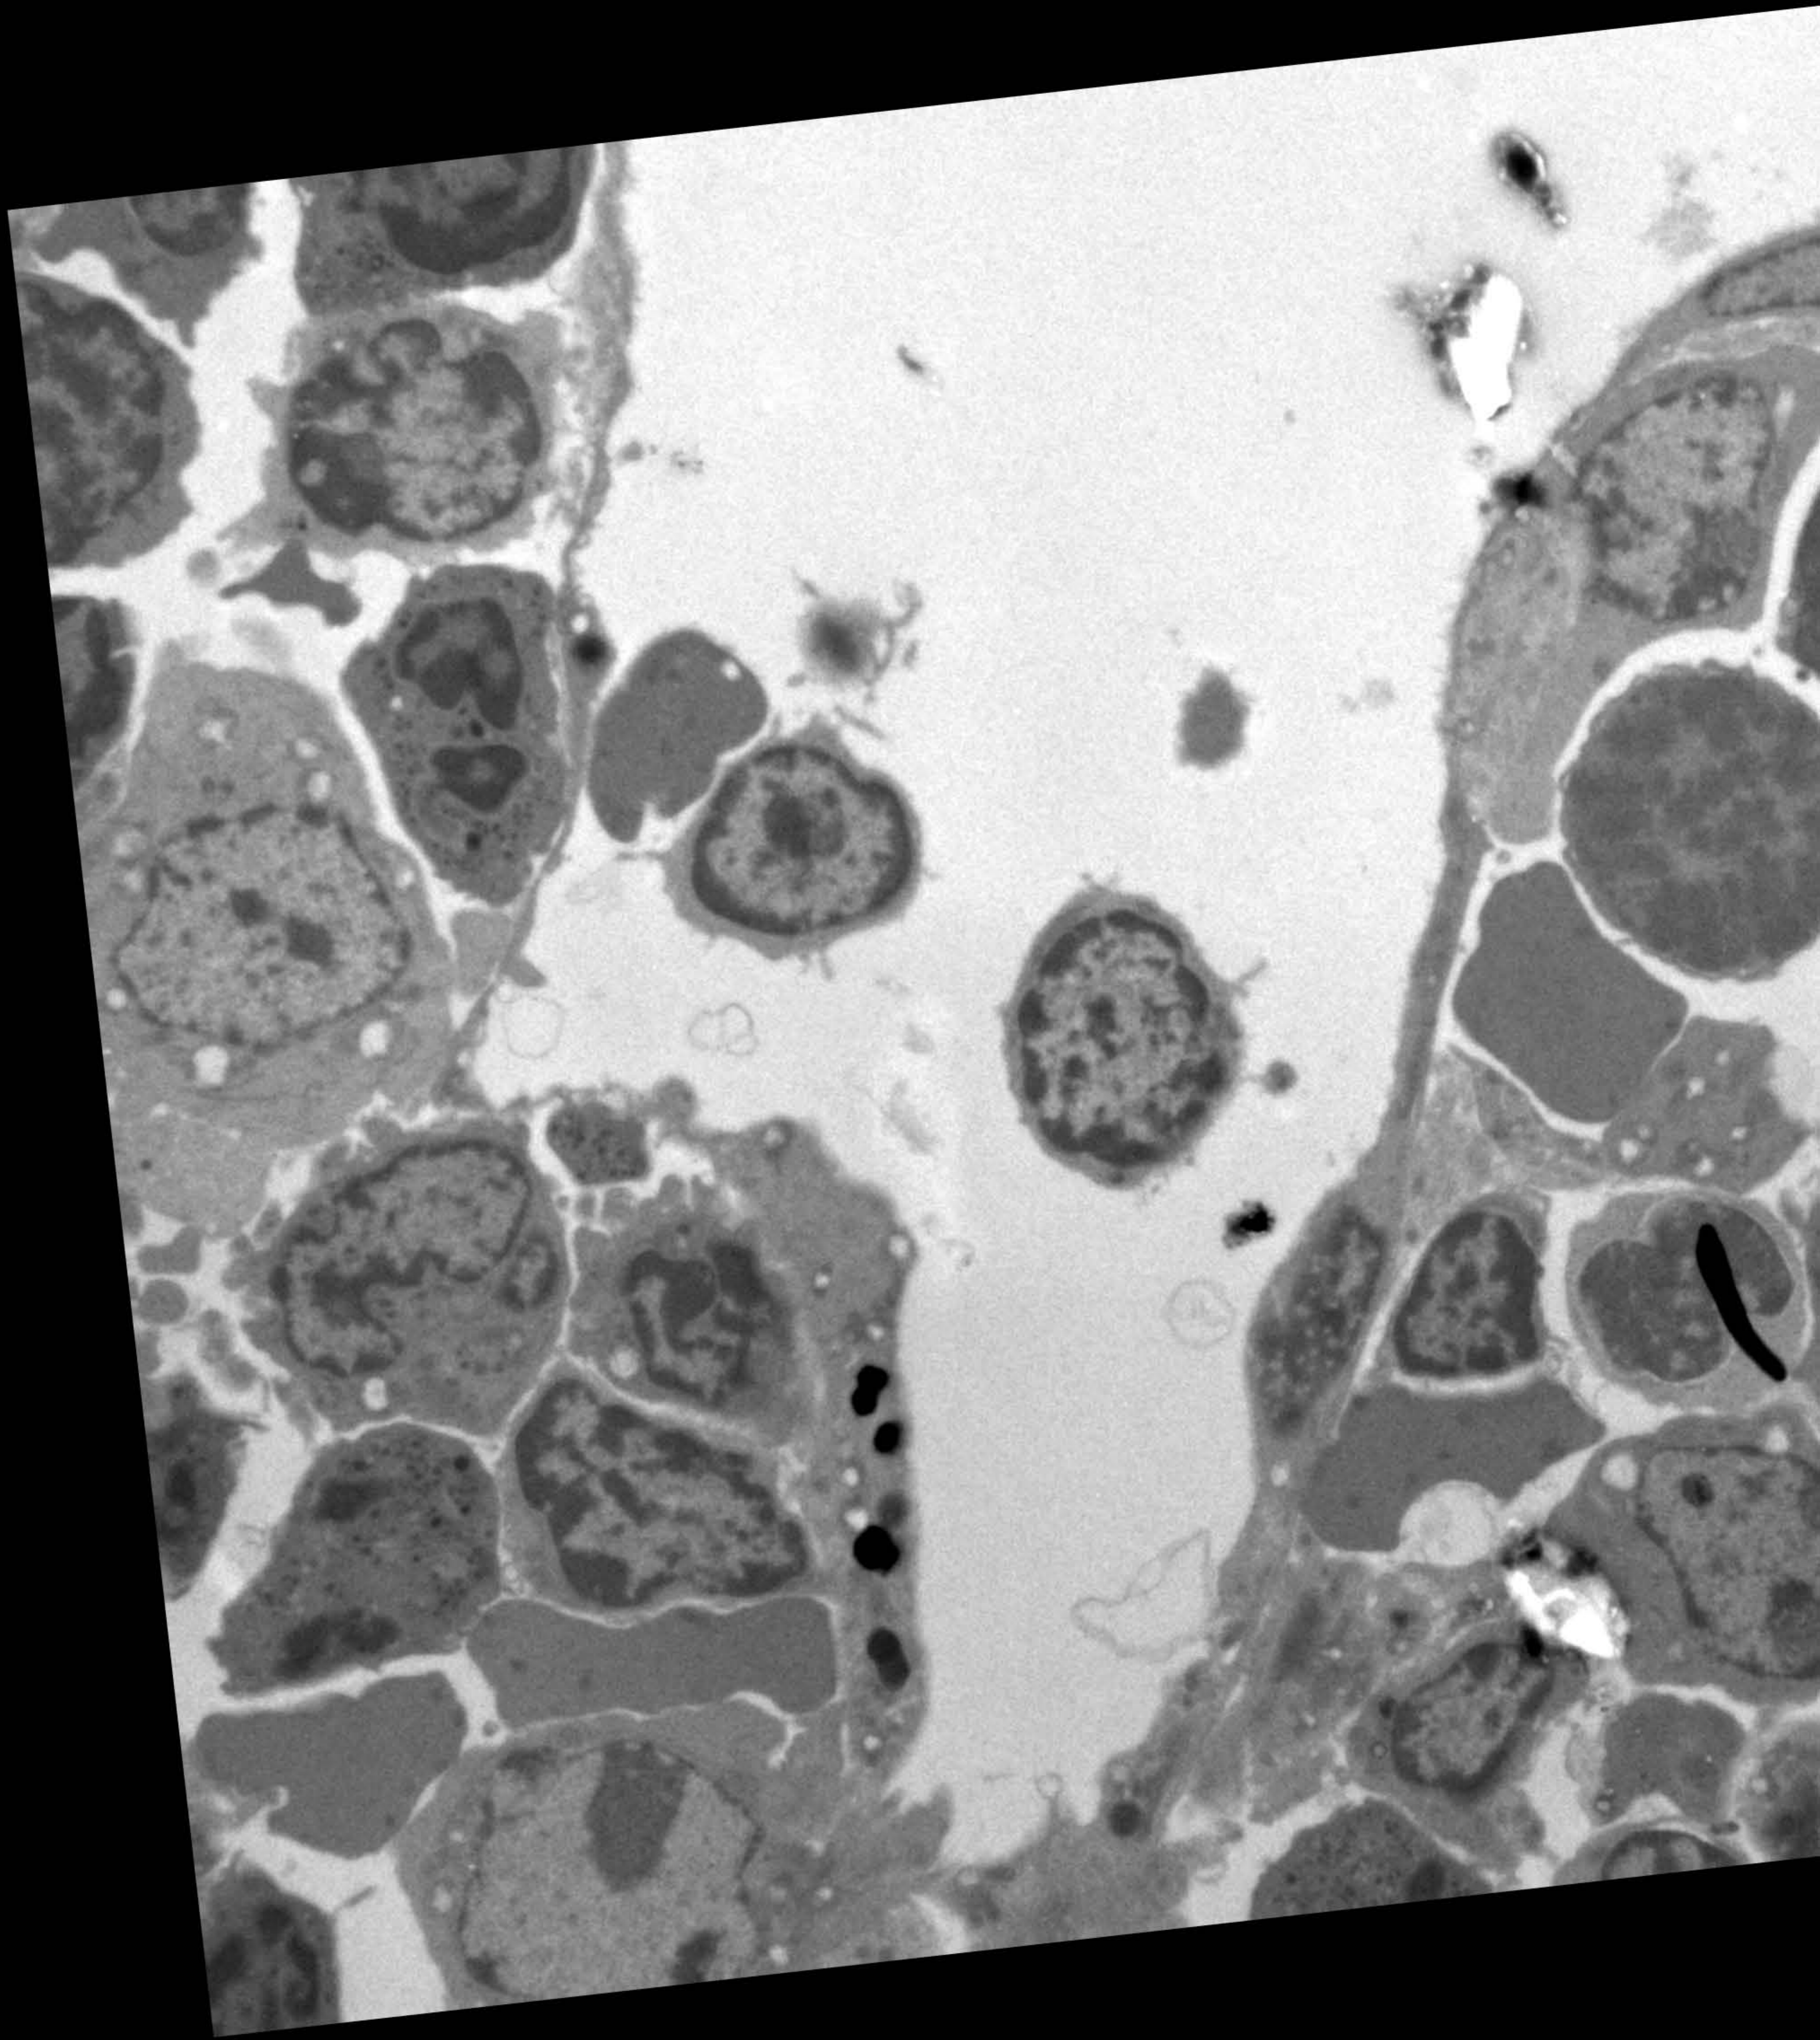

Supplement: inline-supplementary-material-1 [file inline-supplementary-material-1.pdf]
